# Supplementary material for: Programming of the respiratory epithelium in utero - insights from the amniotic epithelial methylome
Source: medRxiv preprint, doi:10.1101/2025.10.02.25337047, version 2 (2026-02-09)
Supplement: Table E1 [file 337047_file04.xlsx]

## Sheet: Sheet1
	Table E1. Tissue-Specific Differentially Methylated Regions (DMRs) and Positions (DMPs).
	Results of differential methylation analysis comparing amniotic and nasal epithelium.

## Sheet: DMR
seqnames	start	end	width	strand	no.cpgs	min_smoothed_fdr	Stouffer	HMFDR	Fisher	maxdiff	meandiff	overlapping.genes	log_width
chr9	97857708	97857909	202	*	56	0	0	6e-32	0	3.33182	2.40134	intergenic	5.30827
chr5	13810017	13810223	207	*	52	0	0	4.7e-19	0	1.45698	1.10609	DNAH5	5.33272
chr6	44076554	44076770	217	*	64	0	0	4.81e-40	0	2.85177	1.01805	AL109615.2	5.3799
chr14	90525423	90525694	272	*	63	0	0	2.32e-43	0	3.74396	1.87076	TTC7B	5.6058
chr19	57317532	57317807	276	*	55	0	0	7.34e-24	0	2.24261	1.21383	AC005261.4	5.6204
chr17	1588773	1589057	285	*	50	0	5.71e-268	2.59e-19	0	-2.88	-1.10759	SLC43A2	5.65249
chr16	28367810	28368103	294	*	50	0	0	7e-26	0	2.37908	1.39779	AC009093.11	5.68358
chr19	4954567	4954867	301	*	56	0	0	2.18e-21	0	-2.55895	-1.14434	UHRF1	5.70711
chr2	230847987	230848308	322	*	55	0	0	7.75e-47	0	4.24352	1.09303	intergenic	5.77455
chr12	124466122	124466450	329	*	50	0	0	1.05e-26	0	-3.6226	-2.65957	NCOR2	5.79606
chr1	16938740	16939072	333	*	50	0	0	1.43e-53	0	4.94129	3.9942	CROCC	5.80814
chr7	65764424	65764760	337	*	58	0	0	7.06e-30	0	2.96534	2.01783	AC073107.2, AC073107.1	5.82008
chr12	120397783	120398123	341	*	64	0	5.65e-276	3.46e-18	7.38850470073292e-319	-2.43914	-1.02542	intergenic	5.83188
chr10	18710215	18710556	342	*	56	0	0	1.63e-18	0	1.79745	1.2225	AL512641.1	5.83481
chr22	27677923	27678269	347	*	50	0	0	4.18e-44	0	-3.40109	-1.33735	AL121885.2	5.84932
chr17	82138619	82138971	353	*	54	0	0	8.58e-50	0	3.77609	1.79625	CCDC57	5.86647
chr19	15453058	15453410	353	*	82	0	0	5.02e-29	0	4.14772	3.632	RASAL3	5.86647
chr14	91303707	91304074	368	*	60	0	0	8.14e-46	0	3.0968	2.20422	CCDC88C	5.90808
chr11	1338807	1339175	369	*	52	0	0	5e-45	0	-4.69552	-2.02735	intergenic	5.9108
chr19	38519152	38519525	374	*	54	0	0	3.53e-53	0	3.43705	1.31487	RYR1	5.92426
chr4	10077555	10077930	376	*	52	0	0	3.28e-52	0	-3.14854	-1.03046	WDR1	5.92959
chr1	227447580	227447955	376	*	50	0	0	4.65e-18	0	1.86816	1.18206	intergenic	5.92959
chr2	23663139	23663515	377	*	59	0	0	5.69e-54	0	-3.88617	-2.2343	KLHL29	5.93225
chr19	11406384	11406760	377	*	55	0	0	6.1e-21	0	-1.91014	-1.062	RGL3	5.93225
chr4	112379289	112379665	377	*	54	0	0	2.74e-35	0	3.9245	3.24099	ALPK1	5.93225
chr19	52428862	52429244	383	*	53	0	0	3.38e-19	0	1.50657	1.15123	ZNF534	5.94803
chr15	27248908	27249291	384	*	50	0	0	7.8e-71	0	4.6086	1.45761	GABRG3	5.95064
chr12	124344559	124344943	385	*	82	0	0	3.9e-37	0	-2.85167	-1.28474	NCOR2	5.95324
chr16	70294670	70295054	385	*	52	0	0	7.62e-25	0	1.95888	1.10371	DDX19B	5.95324
chr16	88766014	88766399	386	*	50	0	0	1.05e-73	0	7.75235	5.62865	PIEZO1	5.95584
chr8	61023626	61024012	387	*	62	0	0	1.1e-36	0	4.23862	1.3201	intergenic	5.95842
chr7	1654932	1655318	387	*	50	0	0	3.16e-50	0	4.39496	2.69692	intergenic	5.95842
chr19	5229498	5229886	389	*	54	0	0	3.12e-19	0	1.9392	1.46489	PTPRS	5.96358
chr6	28977370	28977765	396	*	64	0	0	3.84e-42	0	4.1547	1.64365	RN7SL471P	5.98141
chr1	3125500	3125895	396	*	54	0	0	3.5e-71	0	5.6082	1.80142	PRDM16	5.98141
chr2	121018703	121019099	397	*	54	0	0	1.91e-61	0	3.91104	2.94795	intergenic	5.98394
chr19	3456184	3456582	399	*	58	0	0	1.32e-43	0	2.98432	1.36687	NFIC	5.98896
chr13	36154731	36155129	399	*	58	0	0	3.7e-53	0	4.54848	1.56936	intergenic	5.98896
chr19	38193443	38193842	400	*	59	0	0	3.29e-45	0	-3.45798	-2.51409	SIPA1L3	5.99146
chr4	184168504	184168903	400	*	61	0	0	1.39e-61	0	5.35625	1.95376	ENPP6	5.99146
chr5	139759256	139759656	401	*	66	0	0	7.84e-60	0	-5.02706	-3.23237	intergenic	5.99396
chr8	65560359	65560759	401	*	50	0	0	5.13e-40	0	3.46962	1.60919	LINC01299	5.99396
chr1	3598298	3598700	403	*	55	0	0	3.39e-69	0	-5.6271	-3.59618	MEGF6	5.99894
chr11	76795820	76796223	404	*	50	0	0	4.68e-33	0	-2.7787	-1.91163	TSKU	6.00141
chr17	19980012	19980415	404	*	62	0	0	3.47e-25	0	1.95819	1.16434	intergenic	6.00141
chr5	138257575	138257978	404	*	60	0	0	8.34e-41	0	2.93004	2.43929	GFRA3	6.00141
chr5	171667741	171668144	404	*	60	0	0	1.44e-35	0	4.35843	3.69782	intergenic	6.00141
chr10	48745770	48746174	405	*	50	0	0	1.54e-51	0	3.30346	2.37084	WDFY4, RPL13AP19	6.00389
chr6	138424212	138424616	405	*	56	0	0	7.01e-42	0	3.4336	2.50846	NHSL1	6.00389
chr8	70032883	70033288	406	*	52	0	0	2.91e-44	0	3.32631	1.17951	intergenic	6.00635
chr22	43424815	43425221	407	*	50	0	0	1.28e-36	0	-4.24931	-2.78336	MPPED1	6.00881
chr17	81740558	81740964	407	*	52	0	0	1.36e-43	0	-3.55976	-2.30138	intergenic	6.00881
chr17	4595029	4595437	409	*	52	0	1.26e-238	7.51e-47	1.11e-296	3.62217	1.06367	SMTNL2	6.01372
chr4	8908514	8908922	409	*	54	0	0	1.11e-64	0	6.34598	2.87944	intergenic	6.01372
chr13	20946015	20946424	410	*	61	0	0	9.81e-27	0	3.23866	2.03016	HNRNPA1P30	6.01616
chr11	15941266	15941676	411	*	70	0	0	1.29e-22	0	2.39747	1.34304	intergenic	6.01859
chr17	82180899	82181310	412	*	53	0	0	1.35e-61	0	4.53361	1.22146	CCDC57	6.02102
chr19	50162890	50163301	412	*	65	0	0	2.37e-23	0	2.33525	1.25694	IZUMO2	6.02102
chr1	223129357	223129768	412	*	54	0	0	1.32e-55	0	3.96355	2.04956	TLR5	6.02102
chr16	1106999	1107411	413	*	52	0	0	1e-71	0	5.7303	2.53716	intergenic	6.02345
chr16	1288089	1288502	414	*	57	0	0	1.01e-61	0	3.69729	2.21708	TPSP2	6.02587
chr4	186919431	186919845	415	*	50	0	0	9.02e-26	0	-2.50356	-1.13444	intergenic	6.02828
chr16	30194533	30194948	416	*	69	0	0	2.63e-14	0	1.81556	1.02695	SLX1A, SLX1A-SULT1A3	6.03069
chr7	437533	437949	417	*	55	0	0	3.15e-58	0	5.71789	3.34685	AC188617.1	6.03309
chr10	132497225	132497642	418	*	50	0	0	4.87e-74	0	-5.90733	-2.80723	intergenic	6.03548
chr3	195851061	195851478	418	*	53	0	0	4.21e-56	0	-4.69771	-1.15381	LINC01983	6.03548
chr19	41025728	41026145	418	*	57	0	0	5.69e-26	0	2.53431	1.23723	CYP2A7P1	6.03548
chr19	17294150	17294567	418	*	72	0	0	1.1e-42	0	3.19978	1.28406	MRPL34, ABHD8	6.03548
chr17	38918564	38918982	419	*	67	0	0	1.27e-53	0	3.3657	1.9601	LASP1, AC006441.3	6.03787
chr4	1043753	1044172	420	*	50	0	0	7.5e-71	0	6.36775	3.22475	intergenic	6.04025
chr2	15945533	15945953	421	*	55	0	0	2.49e-27	0	-3.04939	-1.84581	MYCN	6.04263
chr19	1299663	1300083	421	*	65	0	0	6.81e-37	0	2.3424	1.42535	EFNA2	6.04263
chr22	17748639	17749059	421	*	53	0	0	1.76e-40	0	2.85053	2.27819	BID	6.04263
chr12	124506265	124506686	422	*	52	0	0	9.14e-73	0	-6.08179	-4.3311	NCOR2	6.04501
chr19	17497174	17497596	423	*	76	0	0	3.69e-28	0	3.36659	2.64202	SLC27A1, AC010618.3	6.04737
chr17	49556197	49556620	424	*	54	0	0	1.35e-65	0	5.22257	1.41312	AC006487.1, AC006487.2	6.04973
chr7	4792480	4792904	425	*	82	0	0	4.47e-29	0	-2.30925	-1.58462	AP5Z1	6.05209
chr12	132480183	132480607	425	*	61	0	0	6.21e-27	0	1.73632	1.01305	intergenic	6.05209
chr22	20155194	20155621	428	*	55	0	0	4.09e-31	0	-2.10298	-1.0941	intergenic	6.05912
chr7	65731571	65731998	428	*	51	0	0	1.16e-21	0	2.35014	1.58547	AC073107.1	6.05912
chr20	34215985	34216413	429	*	74	0	0	1.31e-41	0	3.25725	1.12065	ASIP	6.06146
chr19	17766609	17767037	429	*	56	0	0	7.02e-20	0	2.05175	1.23953	FCHO1	6.06146
chr14	104784850	104785279	430	*	51	0	0	2.07e-66	0	-4.79361	-2.53589	AKT1	6.06379
chr9	135989805	135990234	430	*	52	0	0	2.07e-55	0	-3.36873	-2.07375	intergenic	6.06379
chr6	41653175	41653604	430	*	50	0	0	1.87e-47	0	4.70809	3.73396	MDFI	6.06379
chr22	43174014	43174443	430	*	53	0	0	5.28e-63	0	6.14735	3.77988	TTLL12	6.06379
chr12	101642354	101642785	432	*	55	0	0	6.06e-38	0	2.46382	1.23104	MYBPC1	6.06843
chr11	865559	865991	433	*	56	0	0	1.93e-27	0	-2.30643	-1.01692	TSPAN4	6.07074
chr19	36775692	36776124	433	*	94	0	0	1.8e-37	0	3.85763	3.30274	AC020928.1, AC020928.2	6.07074
chr13	113981495	113981929	435	*	56	0	0	1.72e-46	0	-5.12539	-1.80256	RASA3	6.07535
chr19	13955815	13956250	436	*	59	0	0	1.88e-51	0	3.78332	1.00827	DCAF15	6.07764
chr5	177116788	177117225	438	*	77	0	0	2.51e-58	0	5.28708	1.6611	intergenic	6.08222
chr17	80198377	80198814	438	*	64	0	0	2.1e-71	0	6.35297	1.66253	CARD14	6.08222
chr19	47716630	47717077	448	*	72	0	0	8.72e-58	0	4.89574	1.26663	AC010519.1, EHD2	6.10479
chr6	50823410	50823859	450	*	65	0	0	1.77e-36	0	3.99876	2.56824	TFAP2B	6.10925
chr12	124738871	124739320	450	*	56	0	0	5.28e-54	0	4.28852	3.82629	intergenic	6.10925
chr6	34263298	34263756	459	*	65	0	0	2.96e-30	0	2.58383	1.30487	AL354740.1, RPL35P2	6.12905
chrX	9890511	9890982	472	*	55	0	0	3.05e-38	0	-3.62454	-1.65275	SHROOM2	6.15698
chr19	35300048	35300520	473	*	60	0	0	3.3e-31	0	2.62273	1.3856	MAG	6.1591
chr13	36125687	36126160	474	*	50	0	0	3.95e-50	0	3.63839	1.94077	DCLK1	6.16121
chr9	113900712	113901189	478	*	54	0	0	6.96e-24	0	2.03238	1.17234	ZNF618	6.16961
chr19	1295505	1295986	482	*	90	0	0	3.77e-30	0	2.53363	1.29271	EFNA2	6.17794
chr11	355857	356339	483	*	68	0	0	5.54e-60	0	3.75031	1.05687	intergenic	6.18002
chr2	233868094	233868580	487	*	85	0	0	3.99e-33	0	2.20484	1.02661	MSL3P1	6.18826
chr20	63931127	63931613	487	*	60	0	0	2.44e-49	0	4.3042	1.77616	DNAJC5	6.18826
chr4	26359300	26359788	489	*	72	0	0	2.57e-37	0	2.95765	2.24135	RBPJ	6.19236
chr17	80586653	80587144	492	*	56	0	0	2.43e-33	0	-3.60146	-2.47093	RPTOR	6.19848
chr14	75546466	75546959	494	*	62	0	0	1.76e-41	0	4.22923	1.27233	BATF	6.20254
chr22	26756671	26757169	499	*	93	0	0	4.43e-65	0	5.34121	1.62652	MIATNB	6.21261
chr6	29863870	29864371	502	*	51	0	5.61e-266	1.02e-17	3.89e-289	2.09702	1.07754	AL645929.2	6.2186
chr10	4188093	4188595	503	*	54	0	0	1.89e-22	0	-2.96864	-1.20928	intergenic	6.22059
chr19	49132878	49133391	514	*	64	0	0	2.11e-24	0	2.45033	1.53782	PPFIA3	6.24222
chr2	241866253	241866766	514	*	50	0	0	6.1e-50	0	4.25283	1.69501	intergenic	6.24222
chr9	84271619	84272134	516	*	55	0	0	4.59e-47	0	3.07126	1.18777	intergenic	6.24611
chr16	1691941	1692457	517	*	50	0	0	1.75e-51	0	4.73895	2.0456	JPT2	6.24804
chr9	124487238	124487755	518	*	74	0	0	1.58e-50	0	3.51117	1.56149	NR5A1	6.24998
chr2	239383522	239384052	531	*	50	0	0	3.04e-33	0	-4.069	-1.34614	HDAC4	6.27476
chr17	80880161	80880691	531	*	54	0	0	7.59e-37	0	-2.97729	-1.06155	RPTOR	6.27476
chr17	35769996	35770526	531	*	94	0	0	3.6e-37	0	2.38161	1.12044	TAF15, MMP28	6.27476
chr2	95525223	95525757	535	*	69	0	0	1.73e-25	0	1.90405	1.08056	AC009237.3, AC009237.14	6.28227
chr10	95295209	95295745	537	*	75	0	0	9.8e-27	0	3.15452	1.2492	intergenic	6.286
chr19	12555429	12555966	538	*	84	0	0	8.94e-36	0	2.95818	2.07848	AC010422.6	6.28786
chr19	23203847	23204388	542	*	81	0	0	2.53e-36	0	3.06139	1.33186	AC092329.2	6.29527
chr19	54063485	54064029	545	*	56	0	0	3.2e-34	0	-3.20813	-2.1919	VSTM1	6.30079
chr19	35224720	35225264	545	*	72	0	0	2.62e-49	0	4.60122	2.64189	FAM187B	6.30079
chr1	116534130	116534676	547	*	85	0	0	2.96e-36	0	3.28047	2.20491	CD58	6.30445
chr8	39978105	39978652	548	*	50	0	0	2.11e-50	0	3.69058	1.16918	IDO2, AC007991.3	6.30628
chr6	156630961	156631509	549	*	58	0	0	2.73e-32	0	2.35088	1.13064	intergenic	6.3081
chr5	98839519	98840067	549	*	63	0	0	1.67e-21	0	1.80334	1.29564	intergenic	6.3081
chr19	870866	871416	551	*	74	0	0	1.19e-36	0	-3.62613	-1.06782	MED16	6.31173
chr19	45940398	45940949	552	*	81	0	0	4.95e-25	0	1.96981	1.21063	NOVA2	6.31355
chr1	31586644	31587196	553	*	79	0	0	5.6e-49	0	-3.34859	-1.85457	TINAGL1	6.31536
chr19	35944555	35945107	553	*	83	0	0	2.52e-34	0	2.44472	1.76262	LRFN3	6.31536
chr9	14978096	14978649	554	*	78	0	0	6.83e-22	0	1.52499	1.06997	CLCN3P1	6.31716
chr22	39405378	39405933	556	*	52	0	3.07e-275	5.08e-32	0	-2.69405	-1.1068	TAB1	6.32077
chr3	308775	309330	556	*	65	0	0	1.45e-39	0	3.7871	2.24324	CHL1, RPS8P6	6.32077
chr19	2076484	2077042	559	*	92	0	0	6.96e-29	0	-2.81274	-1.16897	MOB3A	6.32615
chr3	129343987	129344545	559	*	62	0	1.31e-279	8.72e-47	0	3.50397	1.04078	intergenic	6.32615
chr15	64905296	64905855	560	*	55	0	0	2.29e-50	0	3.62723	1.72382	AC069368.1	6.32794
chr1	157978735	157979294	560	*	64	0	0	1.18e-32	0	3.00403	2.01257	intergenic	6.32794
chr2	98311900	98312461	562	*	54	0	0	2.25e-49	0	3.64323	1.51343	VWA3B	6.3315
chr10	12605965	12606527	563	*	52	0	0	8.78e-80	0	-6.55975	-4.92867	CAMK1D	6.33328
chr11	57349630	57350192	563	*	50	0	0	6.86e-65	0	5.45533	2.28058	P2RX3	6.33328
chr3	23671768	23672330	563	*	54	0	0	7.49e-65	0	5.7419	3.51955	intergenic	6.33328
chr17	75128542	75129108	567	*	58	0	0	7.76e-50	0	-3.98868	-2.25031	ARMC7	6.34036
chr19	14070342	14070909	568	*	52	0	0	3.81e-56	0	4.69715	2.34292	EEF1DP1	6.34212
chr10	131475536	131476108	573	*	52	0	0	1.08e-54	0	3.76922	1.43891	intergenic	6.35089
chr1	21436349	21436922	574	*	55	0	0	8.46e-39	0	3.01124	1.29549	CROCCP5	6.35263
chr17	903798	904373	576	*	52	0	0	1.54e-61	0	-5.24959	-2.98865	NXN	6.35611
chr8	143474848	143475423	576	*	70	0	0	2.21e-36	0	-2.84472	-1.83638	ZC3H3	6.35611
chr9	136840393	136840971	579	*	56	0	0	4.01e-32	0	3.10702	1.03158	RABL6	6.3613
chr19	4361473	4362051	579	*	64	0	0	1.72e-68	0	5.63817	3.18346	SH3GL1	6.3613
chr2	120978004	120978582	579	*	53	0	0	4.68e-66	0	7.16407	3.41088	GLI2	6.3613
chr1	31588661	31589240	580	*	112	0	0	5.57e-59	0	5.16009	2.95152	intergenic	6.36303
chr7	75559530	75560109	580	*	53	0	0	6.36e-65	0	5.21146	2.95321	HIP1	6.36303
chr16	85495989	85496569	581	*	80	0	0	2.04e-46	0	3.67915	1.14847	GSE1	6.36475
chr2	233204146	233204726	581	*	98	0	0	2.28e-28	0	2.24173	1.16021	INPP5D	6.36475
chr19	5567627	5568209	583	*	59	0	0	1.55e-34	0	3.08103	1.1785	TINCR	6.36819
chr4	6953701	6954285	585	*	70	0	0	2.89e-40	0	4.73223	3.91001	TBC1D14	6.37161
chr19	3387769	3388355	587	*	60	0	0	7.53e-49	0	-4.97027	-3.34895	NFIC	6.37502
chr20	57748877	57749463	587	*	55	0	0	2.71e-75	0	-5.7004	-1.29506	intergenic	6.37502
chr2	15984388	15984975	588	*	60	0	0	1.16e-36	0	-2.79256	-1.27358	intergenic	6.37673
chr16	67399187	67399776	590	*	92	0	0	1.92e-45	0	3.26831	1.10871	ZDHHC1	6.38012
chr8	80893501	80894091	591	*	70	0	0	4.79e-64	0	4.55963	1.3281	AC012533.1	6.38182
chr1	168387296	168387886	591	*	50	0	0	3.12e-33	0	2.91443	1.58934	intergenic	6.38182
chr19	13298725	13299316	592	*	134	0	0	1.24e-25	0	2.62051	1.04802	CACNA1A	6.38351
chr16	4334930	4335521	592	*	54	0	0	7.21e-63	0	4.56868	1.61647	GLIS2, PAM16	6.38351
chr6	27772167	27772759	593	*	59	0	0	1.67e-33	0	3.80182	1.61511	intergenic	6.38519
chr6	155247763	155248355	593	*	50	0	0	1.31e-69	0	7.19534	5.83053	TIAM2	6.38519
chr7	1083787	1084381	595	*	60	0	0	8.03e-57	0	-4.42804	-1.97256	GPER1, C7orf50	6.38856
chr1	211478882	211479476	595	*	87	0	0	6.14e-36	0	2.81377	1.34631	RD3	6.38856
chr17	78669929	78670524	596	*	52	0	0	4.06e-30	0	-2.60337	-1.1996	intergenic	6.39024
chr4	3363119	3363715	597	*	53	0	0	1.14e-26	0	-3.13973	-1.49145	RGS12	6.39192
chr16	85642658	85643255	598	*	68	0	0	1.28e-43	0	-3.52068	-1.14159	GSE1	6.39359
chr7	36084788	36085385	598	*	60	0	0	8.31e-70	0	5.42686	1.9842	AC083864.1	6.39359
chr4	13530963	13531563	601	*	64	0	0	1.49e-25	0	2.73149	1.38932	LINC01097	6.39859
chr19	5147825	5148425	601	*	67	0	0	4.63e-60	0	5.27548	3.57483	KDM4B	6.39859
chr8	41725423	41726025	603	*	100	0	0	3.4e-41	0	2.95482	1.35578	ANK1	6.40192
chr17	83087548	83088150	603	*	77	0	0	1.59e-56	0	4.78956	1.97911	METRNL	6.40192
chr2	88283948	88284551	604	*	86	0	0	4.92e-38	0	2.95703	1.36566	intergenic	6.40357
chr7	53218893	53219498	606	*	75	0	0	1.18e-29	0	2.59895	1.18612	intergenic	6.40688
chr19	44646956	44647561	606	*	73	0	0	1.28e-41	0	4.13276	2.86611	PVR, AC243964.3	6.40688
chr21	44848796	44849402	607	*	69	0	0	5.39e-22	0	-2.18463	-1.03747	intergenic	6.40853
chr12	52879362	52879968	607	*	59	0	0	4.95e-50	0	3.6564	1.30171	intergenic	6.40853
chr17	37510260	37510867	608	*	51	0	0	9.4e-38	0	-2.86789	-1.2175	DUSP14	6.41017
chr19	45553433	45554040	608	*	84	0	0	1.07e-23	0	3.37005	2.07752	OPA3	6.41017
chr10	71805661	71806269	609	*	56	0	0	4.72e-35	0	2.34343	1.2297	CDH23	6.41182
chr13	19818233	19818841	609	*	53	0	0	7.16e-55	0	4.50779	3.26654	ST6GALNAC4P1	6.41182
chr10	8074973	8075581	609	*	50	0	0	2.25e-79	0	8.20725	5.72676	GATA3	6.41182
chr11	70176925	70177535	611	*	66	0	0	1.93e-41	0	-4.10603	-1.28242	ANO1	6.4151
chr13	113026341	113026953	613	*	50	0	0	3.75e-77	0	7.34081	3.58669	MCF2L	6.41836
chr18	62384637	62385250	614	*	104	0	0	1.63e-62	0	5.12393	3.53988	TNFRSF11A	6.41999
chr17	44911341	44911955	615	*	98	0	0	9.21e-41	0	2.8534	1.03746	GFAP	6.42162
chr2	127408111	127408725	615	*	119	0	0	8.06e-61	0	4.66689	1.07228	AC068282.2	6.42162
chr19	35126307	35126921	615	*	85	0	0	1.97e-46	0	4.73179	1.88906	LGI4	6.42162
chr15	68256821	68257436	616	*	91	0	0	6.81e-30	0	2.98	1.20611	CLN6	6.42325
chr12	52965150	52965765	616	*	70	0	0	8.64e-58	0	6.5853	2.06422	intergenic	6.42325
chr16	85584457	85585073	617	*	58	0	0	2.04e-33	0	2.47109	1.14097	GSE1	6.42487
chr14	28777906	28778522	617	*	61	0	0	1.96e-55	0	5.63067	4.88287	AL049777.1, LINC01551	6.42487
chr2	660325	660942	618	*	50	0	0	2.89e-24	0	2.85821	1.42692	intergenic	6.42649
chr3	75655347	75655964	618	*	62	0	0	6.54e-26	0	3.11102	2.18116	RPL23AP49	6.42649
chr7	2168683	2169300	618	*	72	0	0	4.03e-43	0	3.74574	2.63527	MAD1L1, AC069288.1	6.42649
chr19	1957775	1958393	619	*	56	0	0	3.4e-55	0	-4.82588	-3.11516	CSNK1G2	6.42811
chr5	2742997	2743616	620	*	60	0	0	1.1e-58	0	-4.85823	-3.34253	intergenic	6.42972
chr12	131003810	131004429	620	*	74	0	0	5.92e-48	0	-3.12879	-1.56966	ADGRD1	6.42972
chr16	10818281	10818900	620	*	58	0	2.61e-228	1.19e-23	1.41e-292	2.74115	1.00395	TVP23A	6.42972
chr14	104574790	104575409	620	*	66	0	0	6.44e-43	0	2.39001	1.04411	TMEM179	6.42972
chr14	101955719	101956339	621	*	86	0	0	3.92e-27	0	1.75005	1.11241	intergenic	6.43133
chr18	11947535	11948155	621	*	63	0	0	1.02e-40	0	3.47507	1.30769	intergenic	6.43133
chr22	50072751	50073372	622	*	52	0	0	4.37e-50	0	2.70511	1.12394	MLC1	6.43294
chr17	8888153	8888775	623	*	76	0	0	1.92e-39	0	3.79342	1.47832	PIK3R5	6.43455
chr6	137878920	137879542	623	*	52	0	0	5.43e-52	0	4.32304	2.52938	TNFAIP3	6.43455
chr11	1232639	1233262	624	*	93	0	0	2.69e-41	0	-2.98503	-1.26483	MUC5B	6.43615
chr4	185004873	185005496	624	*	68	0	0	1.91e-21	0	2.5452	1.04967	LINC02437	6.43615
chr20	3745081	3745705	625	*	53	0	0	5.87e-35	0	3.38191	1.85847	HSPA12B	6.43775
chr1	2969945	2970570	626	*	60	0	0	1.31e-44	0	-3.64745	-1.63686	intergenic	6.43935
chr15	71802440	71803066	627	*	52	0	0	3.43e-42	0	2.40538	1.06284	NR2E3	6.44095
chr22	46685736	46686363	628	*	68	0	0	5.3e-76	0	-6.6579	-3.52309	CERK	6.44254
chr8	798280	798907	628	*	66	0	0	4.03e-52	0	-5.69337	-2.7322	DLGAP2	6.44254
chr14	104545548	104546176	629	*	60	0	0	5.59e-26	0	-2.2333	-1.23998	TMEM179	6.44413
chr19	48735073	48735701	629	*	78	0	0	2.17e-52	0	4.37718	4.02487	RASIP1	6.44413
chr1	27615183	27615812	630	*	93	0	0	9.37e-40	0	4.10171	2.58254	FGR	6.44572
chr22	50461220	50461849	630	*	69	0	0	2.52e-68	0	7.78029	3.41129	SBF1	6.44572
chr10	128470217	128470847	631	*	56	0	0	1.31e-49	0	-4.98512	-2.20287	intergenic	6.44731
chr15	41585184	41585814	631	*	112	0	0	1.7e-70	0	5.65063	1.29959	intergenic	6.44731
chr8	96333215	96333845	631	*	58	0	0	1.05e-39	0	3.73392	1.39993	PTDSS1	6.44731
chr14	77981020	77981651	632	*	71	0	0	2.73e-31	0	3.06779	1.13591	intergenic	6.44889
chr13	24718552	24719183	632	*	77	0	0	6.32e-61	0	3.97146	1.27463	intergenic	6.44889
chr9	69411937	69412568	632	*	92	0	0	5.1e-42	0	3.11715	2.14222	intergenic	6.44889
chr8	143140490	143141122	633	*	55	0	0	5.85e-37	0	-2.17329	-1.25352	intergenic	6.45047
chr17	81135591	81136223	633	*	50	0	0	6.08e-31	0	-2.56872	-1.00684	AC115099.1, AATK	6.45047
chr2	8693087	8693719	633	*	64	0	0	1.35e-56	0	5.87532	2.45189	intergenic	6.45047
chr13	113559932	113560564	633	*	86	0	0	6.25e-58	0	4.777	2.67365	intergenic	6.45047
chr19	1117037	1117670	634	*	78	0	0	7.25e-40	0	-2.82175	-1.14258	SBNO2	6.45205
chr8	54621009	54621642	634	*	80	0	0	1.82e-25	0	2.33284	1.25462	RP1	6.45205
chr6	25027267	25027900	634	*	56	0	0	1.12e-65	0	5.43946	2.02219	RIPOR2	6.45205
chr10	5534228	5534862	635	*	66	0	0	1.58e-72	0	-5.76882	-3.43137	intergenic	6.45362
chr10	119042127	119042761	635	*	82	0	0	4.46e-26	0	-3.28368	-1.31308	EIF3A	6.45362
chr16	83926463	83927097	635	*	54	0	0	9.5e-33	0	4.14674	1.2549	MLYCD	6.45362
chr19	5145715	5146349	635	*	80	0	0	4.64e-58	0	5.6879	1.28668	KDM4B	6.45362
chr2	238225966	238226601	636	*	54	0	0	8.98e-36	0	-3.41239	-1.25587	LINC02610	6.4552
chrX	642055	642691	637	*	96	0	0	2.02e-46	0	-4.6662	-2.95011	SHOX	6.45677
chr17	3924338	3924974	637	*	69	0	0	6.78e-43	0	3.00017	1.22357	ATP2A3	6.45677
chr8	30442163	30442799	637	*	60	0	0	6.81e-36	0	2.94182	1.954	RBPMS	6.45677
chr1	53470167	53470803	637	*	86	0	0	1.97e-35	0	3.21128	2.10617	intergenic	6.45677
chr4	7772616	7773254	639	*	57	0	0	3.55e-51	0	2.5601	1.14336	AFAP1-AS1, AFAP1	6.4599
chr19	18719443	18720082	640	*	56	0	0	3.34e-70	0	5.76173	3.12972	CRTC1	6.46147
chr19	685172	685811	640	*	52	0	0	5.94e-70	0	6.27483	3.97232	PRSS57	6.46147
chr2	240351018	240351657	640	*	56	0	0	4.69e-59	0	6.18461	4.38282	intergenic	6.46147
chr19	14565364	14566004	641	*	70	0	0	3.83e-38	0	-2.75403	-1.17315	TECR	6.46303
chr1	85615996	85616636	641	*	107	0	0	1e-75	0	7.67747	2.82688	intergenic	6.46303
chr15	39976219	39976859	641	*	120	0	0	1.91e-58	0	5.27034	3.53199	EIF2AK4	6.46303
chr16	3295046	3295687	642	*	120	0	0	1.24e-21	0	1.7412	1.17596	ZNF263	6.46459
chr17	47720818	47721459	642	*	52	0	6.7e-283	7.53e-27	0	3.01372	1.23991	intergenic	6.46459
chr9	136701023	136701665	643	*	57	0	0	4e-32	0	-3.148	-1.36242	intergenic	6.46614
chr4	2731647	2732292	646	*	66	0	0	6.64e-65	0	-4.57401	-1.61529	FAM193A	6.4708
chr7	159112255	159112900	646	*	90	0	0	9.97e-50	0	3.86355	1.1023	VIPR2	6.4708
chr19	1998686	1999332	647	*	88	0	0	1.31e-18	0	-1.82285	-1.03727	BTBD2	6.47235
chr11	123261375	123262021	647	*	50	0	0	3.51e-53	0	4.33842	1.75703	intergenic	6.47235
chr2	231900463	231901109	647	*	52	0	0	1.13e-58	0	3.84939	2.73815	intergenic	6.47235
chr8	2006561	2007208	648	*	50	0	0	1.6e-79	0	-7.32251	-3.40218	KBTBD11	6.47389
chr3	184386266	184386913	648	*	80	0	0	1.77e-17	0	1.76843	1.00441	CHRD	6.47389
chr16	583679	584326	648	*	68	0	0	1.5e-15	0	2.0372	1.0597	PIGQ	6.47389
chr1	242890122	242890769	648	*	92	0	0	1.07e-67	0	6.30041	1.13034	AL445675.2	6.47389
chr11	400096	400743	648	*	100	0	0	3.63e-19	0	2.52595	1.24648	PKP3	6.47389
chr8	2144682	2145330	649	*	57	0	0	4.15e-36	0	-3.98665	-1.40918	MYOM2	6.47543
chr10	71377155	71377803	649	*	78	0	0	6.11e-28	0	3.00997	1.05801	SLC29A3	6.47543
chr16	71441375	71442023	649	*	134	0	0	6.36e-38	0	2.20138	1.17983	TLE7	6.47543
chr19	17998054	17998702	649	*	63	0	0	5.55e-54	0	3.37254	1.43137	KCNN1	6.47543
chr21	45874813	45875461	649	*	64	0	0	3.63e-46	0	2.61141	1.5426	PCBP3, AJ011931.2	6.47543
chr16	1432550	1433199	650	*	102	0	0	2.69e-24	0	-2.16529	-1.24673	PERCC1	6.47697
chr13	113080663	113081312	650	*	61	0	0	1.35e-75	0	5.22845	1.617	MCF2L	6.47697
chr19	52585005	52585654	650	*	57	0	0	1.28e-21	0	3.07736	2.22696	ZNF701, AC022150.1	6.47697
chr9	5042617	5043268	652	*	75	0	0	2.89e-18	0	1.72985	1.07984	JAK2	6.48004
chr10	96369989	96370640	652	*	68	0	0	9.54e-79	0	6.52433	3.03388	TLL2	6.48004
chr20	21607878	21608530	653	*	57	0	0	1.85e-29	0	-3.06168	-1.68672	LINC01727	6.48158
chr10	129896251	129896903	653	*	75	0	0	2.82e-38	0	-3.66875	-1.2401	EBF3	6.48158
chr19	2546539	2547191	653	*	75	0	0	8.8e-28	0	1.99654	1.17986	GNG7	6.48158
chr12	4561912	4562565	654	*	86	0	0	4.46e-28	0	2.8091	1.13427	DYRK4	6.48311
chr1	214464504	214465157	654	*	52	0	0	3.19e-60	0	3.71347	1.3846	PTPN14	6.48311
chr17	1190669	1191322	654	*	59	0	0	2.96e-76	0	7.76397	4.71531	ABR	6.48311
chr3	119401694	119402348	655	*	60	0	0	1.42e-23	0	2.13419	1.27228	ARHGAP31	6.48464
chr17	17700216	17700870	655	*	164	0	0	2.57e-43	0	3.97854	3.02214	RAI1	6.48464
chr16	85947703	85948358	656	*	84	0	0	1.91e-28	0	-3.61177	-1.88104	AC092723.5	6.48616
chr7	16850806	16851461	656	*	61	0	0	2.46e-36	0	-2.87802	-1.42269	intergenic	6.48616
chr7	332663	333318	656	*	106	0	0	7.91e-33	0	3.73841	1.09945	AC188616.1	6.48616
chr10	75043512	75044167	656	*	79	0	0	5.58e-49	0	3.59521	2.17559	AC018511.6, DUSP29	6.48616
chr16	47013697	47014354	658	*	81	0	0	2.69e-30	0	2.35235	1.0432	AC018845.1, AC018845.2	6.4892
chr1	40884076	40884734	659	*	126	0	0	2.32e-41	0	3.77283	1.3829	intergenic	6.49072
chr2	1591630	1592289	660	*	88	0	0	1.46e-65	0	4.11955	3.1462	AC141930.1	6.49224
chr19	53037443	53038105	663	*	78	0	0	3.77e-19	0	2.25142	1.11858	ZNF702P	6.49677
chr6	13769292	13769955	664	*	116	0	0	4.31e-19	0	2.10904	1.02304	intergenic	6.49828
chr21	42234689	42235353	665	*	63	0	0	8.71e-73	0	6.5762	1.79905	ABCG1	6.49979
chr10	75276193	75276861	669	*	63	0	0	2.94e-23	0	2.42689	1.32136	ZNF503-AS1, HMGA1P5	6.50578
chr6	29956135	29956803	669	*	56	0	0	1.86e-23	0	2.32062	1.35251	HLA-W	6.50578
chr20	63190939	63191608	670	*	52	0	2.95e-243	1.32e-41	0	-4.50564	-1.40767	intergenic	6.50728
chr4	152045705	152046374	670	*	78	0	0	3.56e-31	0	3.29102	1.20004	intergenic	6.50728
chr10	28925094	28925763	670	*	57	0	0	6.35e-39	0	3.34425	1.99865	LINC01517	6.50728
chr9	124277688	124278357	670	*	56	0	0	6.79e-73	0	6.23602	3.97268	NEK6	6.50728
chr22	36409940	36410610	671	*	93	0	0	3.95e-30	0	3.93825	1.60573	intergenic	6.50877
chr16	30473975	30474645	671	*	88	0	0	3.57e-43	0	3.52896	2.36308	ITGAL	6.50877
chr1	146486492	146487163	672	*	74	0	0	3.19e-24	0	3.14539	1.41765	HYDIN2	6.51026
chr14	68628298	68628970	673	*	100	0	0	1.14e-18	0	2.28987	1.57477	RAD51B, AL121820.2	6.51175
chr19	19145552	19146226	675	*	55	0	0	5.34e-23	0	2.22375	1.10537	MEF2B, BORCS8-MEF2B	6.51471
chr16	88508835	88509510	676	*	67	0	0	2.01e-46	0	-3.88905	-1.0909	ZFPM1	6.51619
chr5	43033831	43034508	678	*	76	0	0	8.47e-28	0	3.4264	2.433	AC025171.5, AC025171.1	6.51915
chr19	35309646	35310327	682	*	88	0	0	9.01e-72	0	6.34994	3.32536	MAG	6.52503
chr8	142381661	142382343	683	*	70	0	0	1.77e-53	0	-5.05489	-2.75073	TSNARE1	6.52649
chr17	8315371	8316053	683	*	74	0	0	4.65e-38	0	4.37263	3.20678	ARHGEF15	6.52649
chr4	3466324	3467008	685	*	52	0	0	5.4e-61	0	3.23133	1.26063	DOK7	6.52942
chr2	230849705	230850389	685	*	67	0	0	2.38e-37	0	1.95058	1.31868	intergenic	6.52942
chr7	101869205	101869892	688	*	61	0	0	1.26e-49	0	5.22552	2.8688	CUX1	6.53379
chr16	268213	268901	689	*	76	0	0	8.88e-31	0	-2.96178	-1.01422	FAM234A, Z69667.1, RGS11	6.53524
chr3	186772437	186773126	690	*	65	0	0	1.65e-37	0	3.0644	1.93179	GPS2P2, AC068631.1	6.53669
chr1	225677123	225677813	691	*	69	0	0	3.58e-40	0	3.22598	1.39278	intergenic	6.53814
chr8	73285336	73286026	691	*	84	0	0	7.88e-31	0	3.58777	1.90077	intergenic	6.53814
chr7	93043170	93043861	692	*	51	0	0	1.64e-29	0	3.48736	2.42066	intergenic	6.53959
chr19	996075	996767	693	*	114	0	0	1.17e-47	0	3.06205	1.10659	WDR18	6.54103
chr12	49389182	49389874	693	*	55	0	0	1.52e-53	0	4.46329	2.01862	SPATS2, AC125611.2	6.54103
chr3	183491750	183492445	696	*	80	0	0	2.76e-22	0	2.56845	1.38291	KLHL6	6.54535
chr19	45385510	45386206	697	*	144	0	0	3.9e-80	0	-5.7002	-3.67802	PPP1R13L	6.54679
chr12	117155315	117156012	698	*	89	0	0	1.32e-45	0	2.6274	1.51921	FBXO21	6.54822
chr10	5641685	5642385	701	*	62	0	0	1.36e-67	0	4.22765	1.38811	ASB13	6.55251
chr15	90275096	90275797	702	*	80	0	0	2.66e-22	0	1.84496	1.02102	NGRN, AC091167.6, AC091167.1	6.55393
chrX	27863709	27864411	703	*	58	0	0	1.9e-19	0	2.03141	1.43278	VKORC1P1	6.55536
chr10	132486768	132487471	704	*	54	0	0	9.13e-41	0	2.90914	1.16058	intergenic	6.55678
chr7	74480242	74480948	707	*	77	0	0	3.15e-34	0	3.57198	1.64386	GTF2IRD1	6.56103
chr10	100114741	100115449	709	*	87	0	0	3.33e-52	0	3.55837	1.46242	CYP2C23P, TPM4P1	6.56386
chr11	126424229	126424938	710	*	60	0	0	6.32e-68	0	4.40962	1.21463	ST3GAL4, KIRREL3	6.56526
chr22	50074673	50075382	710	*	53	0	0	2.26e-58	0	5.26409	3.68129	MLC1	6.56526
chr11	70544897	70545611	715	*	57	0	0	7.7e-66	0	5.81525	1.58989	SHANK2	6.57228
chr13	113854952	113855669	718	*	65	0	0	4.03e-28	0	-3.95998	-1.21752	GAS6	6.57647
chr1	217924604	217925322	719	*	79	0	0	3.63e-28	0	2.32636	1.17858	intergenic	6.57786
chr12	8564252	8564975	724	*	50	0	0	1.67e-35	0	3.1506	1.98545	AC092746.1	6.58479
chr15	72184004	72184728	725	*	72	0	0	2.52e-73	0	6.46219	1.65274	GRAMD2A	6.58617
chr7	82269	82994	726	*	65	0	0	1.95e-30	0	2.67331	1.13334	AC093627.1	6.58755
chr20	18504210	18504935	726	*	60	0	0	2.69e-61	0	4.32114	1.55085	RPS19P1	6.58755
chr16	67980064	67980796	733	*	131	0	0	4.38e-28	0	2.04276	1.1213	DPEP3	6.59715
chr9	91899917	91900649	733	*	56	0	0	1.75e-47	0	3.44806	1.13776	ROR2	6.59715
chr9	33019761	33020493	733	*	53	0	0	1.96e-45	0	3.9779	2.69051	APTX, LAGE3P1	6.59715
chr15	70584884	70585617	734	*	108	0	0	5.09e-69	0	6.28728	1.78717	LINC02204	6.59851
chr14	105481809	105482543	735	*	53	0	0	7.74e-36	0	4.13374	1.34745	intergenic	6.59987
chr18	63948925	63949659	735	*	58	0	0	2.7e-34	0	3.1068	1.43864	HMSD	6.59987
chr1	153532789	153533524	736	*	60	0	0	2.93e-26	0	3.91349	1.64427	intergenic	6.60123
chr1	15065722	15066459	738	*	60	0	0	6.77e-32	0	-3.08829	-1.13098	KAZN	6.60394
chr10	101740271	101741008	738	*	54	0	0	1.19e-31	0	2.20175	1.04072	intergenic	6.60394
chr10	42951514	42952251	738	*	75	0	0	2.54e-34	0	3.76323	2.12093	intergenic	6.60394
chr5	173555342	173556081	740	*	58	0	0	1.45e-44	0	-3.90049	-2.06712	intergenic	6.60665
chr7	1892014	1892753	740	*	66	0	0	8.1e-66	0	6.24868	2.14143	MAD1L1, AC069288.1	6.60665
chr1	27113915	27114655	741	*	56	0	0	7.46e-30	0	-3.90767	-1.68245	SLC9A1	6.608
chr7	5253006	5253746	741	*	51	0	0	4.66e-35	0	2.63576	1.09343	intergenic	6.608
chr11	114082733	114083474	742	*	50	0	0	1.11e-43	0	-4.16918	-2.64233	ZBTB16	6.60935
chr5	179631957	179632698	742	*	85	0	0	1.02e-22	0	2.01197	1.30488	HNRNPH1	6.60935
chr9	88006653	88007394	742	*	85	0	0	3.49e-59	0	5.80613	2.46523	intergenic	6.60935
chr2	71560300	71561041	742	*	53	0	0	7.12e-47	0	4.56761	3.1545	DYSF	6.60935
chr5	171336423	171337166	744	*	68	0	0	1.3e-18	0	2.58665	1.11021	intergenic	6.61204
chr17	77477262	77478005	744	*	51	0	0	2.32e-72	0	7.16398	5.3399	SEPTIN9	6.61204
chr17	81445015	81445761	747	*	56	0	0	9.61e-64	0	4.55062	2.04721	BAHCC1	6.61607
chr8	143463463	143464209	747	*	76	0	0	3.74e-60	0	5.19008	2.64937	ZC3H3	6.61607
chr6	168232669	168233416	748	*	50	0	0	1.3e-42	0	2.95051	1.24818	AL606970.2	6.6174
chr12	52601103	52601850	748	*	96	0	0	2.52e-58	0	4.72202	1.93791	KRT73-AS1, KRT72	6.6174
chr15	42056902	42057650	749	*	67	0	0	2.68e-35	0	2.70599	1.0399	intergenic	6.61874
chr11	59898106	59898858	753	*	69	0	0	2.3e-21	0	2.04679	1.22771	SRD5A3P1	6.62407
chr19	17576847	17577599	753	*	53	0	0	2.04e-26	0	3.13206	2.1794	COLGALT1	6.62407
chr4	82758667	82759419	753	*	53	0	0	1.27e-65	0	3.96946	2.28769	SCD5	6.62407
chr12	132595781	132596534	754	*	58	0	0	2.53e-73	0	7.74452	3.04161	intergenic	6.62539
chr17	42653420	42654174	755	*	57	0	0	1.37e-29	0	2.71297	1.31188	intergenic	6.62672
chr17	78125126	78125881	756	*	64	0	0	6.01e-29	0	-3.62103	-1.91424	TMC6	6.62804
chr19	15195543	15196298	756	*	89	0	0	1.78e-24	0	2.68456	1.03652	NOTCH3	6.62804
chr1	16724580	16725335	756	*	72	0	0	1.24e-35	0	2.67768	1.2304	intergenic	6.62804
chr8	38650505	38651262	758	*	132	0	0	5.84e-33	0	2.90505	1.36722	intergenic	6.63068
chr2	127042946	127043703	758	*	64	0	0	4.57e-69	0	6.61738	3.1876	intergenic	6.63068
chr10	103472965	103473723	759	*	98	0	0	8.79e-37	0	2.51308	1.01571	CALHM3	6.632
chr19	12596882	12597641	760	*	86	0	0	1.46e-43	0	3.43007	2.54778	ZNF490	6.63332
chr9	137370872	137371633	762	*	118	0	0	7.81e-35	0	-3.24869	-1.34622	EXD3	6.63595
chr13	112956819	112957580	762	*	50	0	0	3.95e-62	0	3.73686	1.0774	MCF2L	6.63595
chr7	157418331	157419092	762	*	75	0	0	8.67e-51	0	4.0746	1.22338	intergenic	6.63595
chr12	1639589	1640350	762	*	83	0	0	9.46e-26	0	2.86077	1.77017	WNT5B	6.63595
chr16	88642809	88643574	766	*	94	0	0	2.62e-57	0	4.58732	1.99444	CYBA	6.64118
chr16	88296829	88297595	767	*	55	0	0	1.67e-43	0	2.28532	1.08963	AC138512.1	6.64249
chr17	81196587	81197354	768	*	70	0	0	3.34e-25	0	-3.09897	-1.15383	CEP131	6.64379
chr11	44957072	44957840	769	*	72	0	0	4.07e-58	0	4.91949	2.84669	intergenic	6.64509
chr17	3981510	3982281	772	*	60	0	0	1.9e-61	0	4.66643	1.82682	LINC01975	6.64898
chr19	8584868	8585639	772	*	144	0	0	3.39e-36	0	2.81927	1.99008	ADAMTS10	6.64898
chr11	58900438	58901210	773	*	58	0	0	2.24e-32	0	3.5821	1.37622	GLYATL2	6.65028
chr7	4803733	4804507	775	*	59	0	0	1.1e-45	0	3.48078	1.67718	RADIL	6.65286
chr19	1503038	1503813	776	*	104	0	0	3.12e-36	0	3.10421	1.17529	intergenic	6.65415
chr10	5646217	5646993	777	*	52	0	0	4.1e-55	0	-3.65234	-2.06335	ASB13	6.65544
chr12	106903050	106903827	778	*	61	0	0	7.19e-31	0	2.07059	1.19165	intergenic	6.65673
chr1	10960464	10961241	778	*	63	0	0	2.77e-49	0	3.4705	1.34687	C1orf127	6.65673
chr7	50158814	50159591	778	*	56	0	0	6.46e-27	0	2.12534	1.45135	SPATA48	6.65673
chr10	3257492	3258269	778	*	50	0	0	8.5e-68	0	7.45371	5.35586	LINC02668	6.65673
chr19	45398094	45398872	779	*	52	0	0	4.61e-45	0	3.58011	1.86333	PPP1R13L	6.65801
chr6	35181853	35182631	779	*	110	0	0	2.55e-55	0	6.09355	3.25047	intergenic	6.65801
chr1	230356970	230357750	781	*	74	0	0	3.55e-30	0	-2.72435	-1.0594	PGBD5	6.66058
chr4	154332669	154333450	782	*	105	0	0	1.24e-47	0	3.57119	1.27064	DCHS2	6.66185
chr5	2537095	2537877	783	*	53	0	0	5.49e-70	0	-4.76864	-3.22457	intergenic	6.66313
chr2	239348863	239349645	783	*	56	0	0	1.5e-41	0	-3.95369	-2.00156	HDAC4	6.66313
chrX	1536986	1537771	786	*	68	0	0	3.4e-80	0	-6.3601	-3.5048	P2RY8	6.66696
chr17	44779100	44779885	786	*	67	0	0	1.5e-51	0	3.82119	1.09441	ADAM11	6.66696
chr3	194296691	194297476	786	*	79	0	0	1.3e-51	0	4.63864	3.1035	LINC00887	6.66696
chr1	2428019	2428805	787	*	81	0	0	4.35e-47	0	-5.5565	-3.58434	PLCH2	6.66823
chr22	25178806	25179592	787	*	105	0	0	1.07e-78	0	5.62895	3.56066	KIAA1671, Z99916.2	6.66823
chr19	7267308	7268097	790	*	68	0	0	2.33e-41	0	-4.35887	-1.06259	INSR	6.67203
chr10	101121015	101121804	790	*	93	0	0	6.04e-25	0	2.57221	1.10072	TLX1NB	6.67203
chr1	211698617	211699406	790	*	52	0	0	2.41e-55	0	4.094	1.85226	intergenic	6.67203
chr5	171629818	171630608	791	*	57	0	0	1.27e-30	0	2.38649	1.3718	intergenic	6.6733
chr17	27349158	27349949	792	*	124	0	0	4.09e-75	0	6.82201	2.41426	AC026254.2	6.67456
chr2	44086758	44087550	793	*	80	0	0	6.18e-46	0	3.34532	1.22415	intergenic	6.67582
chr2	172674283	172675076	794	*	64	0	0	6.33e-35	0	2.11189	1.15153	AC018712.1	6.67708
chr19	2511016	2511809	794	*	72	0	0	8.77e-77	0	4.18935	1.53185	GNG7	6.67708
chr6	27544997	27545791	795	*	82	0	0	4e-50	0	-3.08556	-1.9231	intergenic	6.67834
chr11	130197835	130198629	795	*	64	0	0	2.11e-39	0	3.14902	1.25314	ST14	6.67834
chr7	118214003	118214798	796	*	100	0	0	6.14e-31	0	2.52822	1.29325	ANKRD7	6.6796
chr22	17792416	17793211	796	*	58	0	0	5.67e-50	0	4.60011	1.419	MICAL3, AC016026.1	6.6796
chr19	35123964	35124760	797	*	72	0	0	1.47e-54	0	3.88173	1.04351	AC020907.6, FXYD3, LGI4	6.68085
chr13	30445535	30446331	797	*	84	0	0	1.22e-59	0	4.63488	1.56321	intergenic	6.68085
chr21	38912898	38913694	797	*	74	0	0	3.41e-34	0	3.94721	2.73089	AP001042.1	6.68085
chr9	136695985	136696782	798	*	52	0	0	5.4e-54	0	-4.95935	-1.5902	intergenic	6.68211
chr3	105353692	105354491	800	*	76	0	0	2.21e-74	0	8.17204	2.11233	intergenic	6.68461
chr19	16417486	16418285	800	*	58	0	0	1.56e-70	0	5.50968	2.3911	EPS15L1	6.68461
chr9	121299031	121299833	803	*	78	0	0	1.7e-35	0	4.113	1.25039	GSN	6.68835
chr4	26028267	26029069	803	*	73	0	0	1.28e-42	0	3.15307	1.38254	intergenic	6.68835
chr8	1912167	1912970	804	*	72	0	0	3.79e-50	0	-3.50241	-1.80611	AC019257.8, ARHGEF10	6.6896
chr15	71214628	71215431	804	*	96	0	0	9.36e-40	0	4.11329	1.17952	THSD4	6.6896
chr16	89031918	89032722	805	*	50	0	0	2.86e-58	0	-5.45379	-3.19966	intergenic	6.69084
chr10	132231984	132232788	805	*	61	0	0	6.44e-45	0	-3.54248	-2.24861	STK32C	6.69084
chr1	12539963	12540767	805	*	67	0	0	6.78e-76	0	5.83305	4.73511	intergenic	6.69084
chr17	40863108	40863914	807	*	100	0	0	2.44e-38	0	2.80991	1.04381	AC004231.4, KRT12	6.69332
chr20	2820944	2821750	807	*	116	0	0	1.04e-37	0	3.3088	1.39853	intergenic	6.69332
chr18	69402608	69403414	807	*	51	0	0	6.92e-55	0	3.83959	1.52866	DOK6	6.69332
chr13	111853232	111854040	809	*	57	0	0	4.52e-40	0	-3.33394	-1.70971	intergenic	6.6958
chr7	2993509	2994318	810	*	61	0	0	1.3e-37	0	-3.47556	-1.75947	CARD11	6.69703
chr20	34997236	34998046	811	*	56	0	0	4.56e-44	0	2.20407	1.31836	MYH7B	6.69827
chr16	88527415	88528225	811	*	50	0	0	6.01e-38	0	3.51819	1.46141	ZFPM1, AC116552.1	6.69827
chr19	1287148	1287960	813	*	85	0	0	5.02e-39	0	-2.92597	-1.15681	EFNA2	6.70073
chr6	168132632	168133444	813	*	78	0	0	1.29e-39	0	3.5791	1.36126	intergenic	6.70073
chr6	16305864	16306676	813	*	70	0	0	2.59e-58	0	4.41702	1.81966	ATXN1	6.70073
chr2	64609072	64609884	813	*	67	0	0	2.14e-59	0	4.48464	1.85813	LINC02579	6.70073
chr20	35174353	35175167	815	*	77	0	0	2.65e-36	0	3.51854	2.10125	PROCR, AL356652.1	6.70319
chr11	58963360	58964174	815	*	71	0	0	4.53e-42	0	4.04221	3.0825	GLYATL1, AP001636.3	6.70319
chr12	114671520	114672336	817	*	106	0	0	6.38e-71	0	-5.06973	-3.29954	TBX3	6.70564
chr7	52273772	52274588	817	*	119	0	0	7.35e-36	0	2.93124	1.08736	intergenic	6.70564
chr18	77111673	77112490	818	*	54	0	0	1.53e-25	0	-3.65601	-1.81037	MBP	6.70686
chr20	25479073	25479891	819	*	54	0	0	3.39e-64	0	-4.33993	-2.42793	NINL	6.70808
chr19	4369293	4370111	819	*	63	0	0	9.44e-48	0	-3.67919	-1.81884	SH3GL1	6.70808
chr1	48898882	48899700	819	*	62	0	0	1.05e-20	0	1.8836	1.15149	AGBL4	6.70808
chr17	7173606	7174425	820	*	122	0	0	1.12e-62	0	4.54941	2.25754	ASGR1	6.7093
chr3	137509192	137510013	822	*	66	0	0	1.92e-32	0	-3.48407	-2.08582	intergenic	6.71174
chr5	101783309	101784130	822	*	54	0	0	4.39e-41	0	-3.88708	-1.54631	intergenic	6.71174
chr1	3166250	3167071	822	*	59	0	0	1.12e-43	0	-4.07187	-1.08463	PRDM16	6.71174
chr3	9862445	9863266	822	*	97	0	0	1.49e-74	0	7.65808	1.6076	intergenic	6.71174
chr2	231604301	231605123	823	*	85	0	0	2.68e-35	0	4.03169	1.00206	intergenic	6.71296
chr4	8649336	8650158	823	*	56	0	0	7.32e-68	0	4.65217	2.02041	intergenic	6.71296
chr2	239239883	239240708	826	*	64	0	0	6.35e-62	0	-4.59976	-2.23715	HDAC4	6.71659
chr14	99737392	99738217	826	*	76	0	0	2.08e-45	0	3.89006	-1.06272	EML1	6.71659
chr10	277319	278146	828	*	74	0	0	1.44e-25	0	-3.6577	-1.30918	DIP2C	6.71901
chr7	151390399	151391226	828	*	60	0	0	1.35e-29	0	-3.69015	-1.23791	WDR86	6.71901
chr5	1139896	1140724	829	*	54	0	0	7.92e-31	0	-2.39551	-1.02345	intergenic	6.72022
chr17	80187107	80187939	833	*	64	0	0	8.77e-32	0	-3.09637	-1.34291	CARD14	6.72503
chr1	178486417	178487250	834	*	122	0	0	8.28e-50	0	3.90014	1.89975	CLEC20A	6.72623
chr3	9135730	9136564	835	*	81	0	0	1.35e-57	0	5.15633	1.29984	SRGAP3	6.72743
chr17	78925417	78926253	837	*	58	0	0	2.85e-67	0	4.65117	1.32248	intergenic	6.72982
chr22	45880435	45881271	837	*	107	0	0	1.37e-40	0	3.81876	1.41998	BX324167.1	6.72982
chr6	6759291	6760127	837	*	53	0	0	1e-54	0	3.56065	1.83768	AL136361.1	6.72982
chr12	46825577	46826414	838	*	62	0	0	3.97e-50	0	3.75313	1.94129	AC008014.1, SLC38A4	6.73102
chr6	42911083	42911921	839	*	76	0	0	1.89e-32	0	3.46725	1.1679	intergenic	6.73221
chr19	5821780	5822619	840	*	51	0	0	1.01e-25	0	-2.97454	-1.5118	intergenic	6.7334
chr6	37492740	37493580	841	*	61	0	0	7.11e-48	0	-4.21392	-1.6465	CCDC167	6.73459
chr18	9017264	9018104	841	*	68	0	0	1.23e-62	0	4.99982	2.10058	intergenic	6.73459
chr7	1930991	1931831	841	*	75	0	0	2.06e-72	0	8.37516	3.16828	MAD1L1, AC069288.1	6.73459
chr10	4024089	4024930	842	*	50	0	0	2.98e-78	0	6.52017	1.50233	AC025822.1	6.73578
chr17	917601	918443	843	*	52	0	0	1.02e-42	0	-4.26654	-2.79661	NXN	6.73697
chr1	2855256	2856099	844	*	120	0	0	1.68e-36	0	-4.0313	-2.65915	intergenic	6.73815
chr1	2025585	2026428	844	*	101	0	0	7.72e-20	0	-2.24648	-1.0669	GABRD	6.73815
chr5	123285215	123286058	844	*	51	0	0	1.41e-41	0	2.86296	1.85971	intergenic	6.73815
chr15	25596628	25597471	844	*	75	0	0	3.41e-77	0	6.37952	2.93385	intergenic	6.73815
chr17	896767	897611	845	*	68	0	0	5.09e-52	0	-4.23957	-3.2643	NXN	6.73934
chr13	100526221	100527065	845	*	59	0	0	5.59e-64	0	5.36981	3.1625	PCCA	6.73934
chr8	948406	949251	846	*	54	0	0	6.28e-27	0	-3.74126	-1.04037	DLGAP2	6.74052
chr16	87995754	87996600	847	*	68	0	0	9.02e-40	0	-3.25784	-1.10684	BANP	6.7417
chr2	96470704	96471550	847	*	72	0	0	3.09e-53	0	3.91896	2.18425	intergenic	6.7417
chr11	133575801	133576648	848	*	59	0	0	3.95e-35	0	2.10364	1.03145	intergenic	6.74288
chr3	65356487	65357334	848	*	134	0	0	6.57e-52	0	4.18422	2.32876	MAGI1	6.74288
chr19	41330994	41331841	848	*	55	0	0	8.12e-47	0	4.11548	3.40645	TGFB1	6.74288
chr19	827428	828277	850	*	52	0	0	3.16e-70	0	-4.64093	-2.61426	AZU1	6.74524
chr4	94758428	94759277	850	*	64	0	0	1.34e-22	0	2.83205	1.16248	BMPR1B	6.74524
chr17	1186762	1187611	850	*	64	0	0	2.12e-65	0	4.25487	2.00934	ABR	6.74524
chr7	155483354	155484205	852	*	53	0	0	1.09e-36	0	-3.33386	-1.10219	CNPY1, AC009403.2	6.74759
chr11	2526956	2527808	853	*	66	0	0	2.69e-78	0	-4.87846	-1.76368	KCNQ1	6.74876
chr5	14959537	14960389	853	*	57	0	7.44e-243	5.79e-38	0	-3.9653	-1.07642	SEPHS2P1	6.74876
chr18	50729135	50729988	854	*	148	0	0	6.66e-30	0	-2.7159	-1.07285	MAPK4	6.74993
chr1	223748640	223749494	855	*	144	0	0	4.62e-44	0	4.5262	1.75168	CAPN2	6.7511
chr6	170058498	170059352	855	*	71	0	0	2e-77	0	6.08512	2.06993	intergenic	6.7511
chr2	24827428	24828282	855	*	53	0	0	4.91e-71	0	4.96117	2.07122	ADCY3	6.7511
chr14	20622723	20623578	856	*	79	0	0	6.29e-35	0	2.60694	-1.24197	intergenic	6.75227
chr4	55793460	55794315	856	*	111	0	0	3.62e-46	0	3.32166	1.4939	intergenic	6.75227
chr5	142551104	142551959	856	*	52	0	0	1.4e-40	0	3.44151	2.46616	SPRY4-AS1	6.75227
chr10	76111845	76112700	856	*	77	0	0	2.21e-41	0	4.5795	3.12849	LRMDA	6.75227
chr19	51103904	51104760	857	*	169	0	0	6.52e-20	0	1.97934	1.3055	CTU1	6.75344
chr7	21169304	21170161	858	*	56	0	0	1.46e-53	0	4.34761	2.27553	intergenic	6.7546
chr9	134545336	134546193	858	*	67	0	0	6.62e-66	0	6.01455	2.97679	intergenic	6.7546
chr9	131621802	131622661	860	*	58	0	0	3.02e-49	0	-4.21904	-1.48652	RAPGEF1	6.75693
chr1	248811458	248812317	860	*	113	0	0	4.07e-32	0	2.62079	1.29114	SH3BP5L	6.75693
chr2	43067803	43068662	860	*	114	0	0	6.66e-73	0	7.65022	2.66423	intergenic	6.75693
chr8	806322	807182	861	*	57	0	0	3.82e-49	0	-4.8346	-2.63818	DLGAP2	6.75809
chr19	38949734	38950594	861	*	133	0	0	3.87e-44	0	3.21864	1.14658	AC011455.2, FBXO17	6.75809
chr4	41644275	41645135	861	*	85	0	0	3.53e-25	0	3.0537	1.24031	LIMCH1	6.75809
chr10	133240885	133241746	862	*	52	0	0	5.57e-63	0	-4.91561	-2.70269	VENTX	6.75926
chr14	97033146	97034008	863	*	140	0	0	2.28e-51	0	3.42487	1.24098	intergenic	6.76041
chr2	172109401	172110265	865	*	62	0	0	5.43e-42	0	3.90589	1.2748	DLX2-DT	6.76273
chr22	44172196	44173061	866	*	52	0	0	1.28e-76	0	-6.64653	-3.88188	PARVB, PARVG	6.76388
chr9	136224981	136225846	866	*	59	0	0	1.97e-53	0	-3.7676	-2.40822	QSOX2	6.76388
chr16	86827118	86827984	867	*	54	0	0	6.8e-96	0	-7.86603	-2.5236	intergenic	6.76504
chr19	43901223	43902089	867	*	64	0	0	6.08e-31	0	3.09513	1.00994	AC006213.3, ZNF404, AC006213.2	6.76504
chr1	236347606	236348474	869	*	97	0	0	5.55e-34	0	2.85481	1.3183	EDARADD	6.76734
chr13	100521325	100522194	870	*	55	0	0	1.78e-67	0	-4.35199	-1.63317	PCCA	6.76849
chr15	89999972	90000842	871	*	124	0	0	5.54e-42	0	4.74356	2.12711	intergenic	6.76964
chr14	102900649	102901520	872	*	75	0	0	2.82e-42	0	-3.85641	-1.87017	TRAF3	6.77079
chr12	55935254	55936125	872	*	66	0	0	1.68e-59	0	5.85893	3.88722	DGKA	6.77079
chr6	77650141	77651013	873	*	78	0	0	1.21e-49	0	3.27294	1.94052	MEI4	6.77194
chr2	144389292	144390165	874	*	62	0	0	1.13e-38	0	4.42723	2.8609	ZEB2	6.77308
chr2	170973400	170974275	876	*	149	0	0	4.35e-66	0	4.84598	1.0339	intergenic	6.77537
chr14	36508549	36509428	880	*	57	0	3.48e-308	1.58e-21	0	2.14304	1.02511	AL132857.1, SFTA3, SFTA3	6.77992
chr1	2397346	2398225	880	*	54	0	0	2.19e-40	0	4.51385	1.16826	RER1	6.77992
chr17	969498	970378	881	*	51	0	0	2.5e-50	0	4.73129	3.7983	NXN	6.78106
chr14	103138202	103139083	882	*	139	0	0	1.95e-50	0	3.96184	2.15145	intergenic	6.78219
chr2	241762651	241763536	886	*	50	0	0	7.15e-35	0	4.1928	2.12861	D2HGDH	6.78672
chr1	235971430	235972316	887	*	51	0	0	5.16e-37	0	3.00247	1.06122	LINC02768	6.78784
chr2	197164344	197165230	887	*	70	0	0	1.42e-34	0	3.31396	1.71665	ANKRD44	6.78784
chr2	7031737	7032624	888	*	78	0	0	1.38e-78	0	-5.20434	-2.04925	RNF144A	6.78897
chr7	99598031	99598919	889	*	72	0	0	4.27e-17	0	1.63349	1.05854	AC005020.2, TMEM225B	6.7901
chr15	67967969	67968858	890	*	53	0	6.21e-234	6.64e-36	0	3.89838	1.10299	intergenic	6.79122
chr17	83089198	83090087	890	*	72	0	0	6.11e-61	0	6.32856	4.1786	METRNL	6.79122
chr7	132614792	132615682	891	*	56	0	0	5.73e-63	0	4.1045	1.63553	PLXNA4	6.79234
chr15	40290670	40291560	891	*	94	0	0	2.98e-33	0	4.2515	3.88431	PLCB2	6.79234
chr7	158508485	158509376	892	*	55	0	0	7.08e-33	0	-2.75455	-1.11483	PTPRN2	6.79347
chr8	37830668	37831559	892	*	50	0	0	1.36e-54	0	3.61429	1.42024	ADGRA2	6.79347
chr15	67863379	67864271	893	*	108	0	0	5.5e-69	0	4.5016	1.03382	AC009292.2	6.79459
chr7	1824007	1824899	893	*	62	0	0	2.62e-42	0	3.91701	1.03928	MAD1L1, AC069288.1	6.79459
chr11	111735444	111736336	893	*	50	0	0	2.13e-59	0	3.93831	1.55598	PPP2R1B	6.79459
chr7	996914	997810	897	*	71	0	0	1.29e-39	0	3.94289	1.08427	C7orf50	6.79906
chr10	62812820	62813716	897	*	67	0	0	8.35e-37	0	2.79475	1.49364	EGR2	6.79906
chr15	77027559	77028455	897	*	93	0	0	1.59e-57	0	4.22193	2.8843	PSTPIP1	6.79906
chr3	196219298	196220195	898	*	53	0	0	4.99e-36	0	-2.9076	-1.31542	SLC51A, PCYT1A	6.80017
chr10	97043142	97044039	898	*	77	0	0	6.65e-70	0	3.58605	1.34655	SLIT1	6.80017
chr10	14532784	14533683	900	*	62	0	0	2.5e-79	0	7.26444	4.59642	FAM107B	6.80239
chr11	123577093	123577993	901	*	89	0	0	1.88e-54	0	3.1157	1.20241	GRAMD1B	6.80351
chr1	46485512	46486412	901	*	56	0	0	3.44e-46	0	4.45656	2.60836	intergenic	6.80351
chr21	45392521	45393422	902	*	75	0	0	1.45e-41	0	-4.03508	-2.29455	intergenic	6.80461
chr4	7655287	7656188	902	*	68	0	0	2.04e-62	0	6.42276	4.27098	SORCS2	6.80461
chrX	47077975	47078877	903	*	63	0	0	3.26e-21	0	2.25136	1.08295	RGN	6.80572
chr2	111366009	111366911	903	*	69	0	0	1.99e-68	0	3.79372	1.1753	MIR4435-2HG	6.80572
chr11	8206141	8207044	904	*	50	0	0	6.12e-74	0	-5.35946	-3.81314	intergenic	6.80683
chr11	85934671	85935574	904	*	130	0	0	1.4e-32	0	2.62034	1.40276	SLC25A1P1	6.80683
chr13	113666573	113667477	905	*	60	0	0	2.84e-49	0	3.09493	1.01743	GRK1	6.80793
chr13	20301259	20302164	906	*	129	0	0	7.94e-47	0	4.43833	2.49835	intergenic	6.80904
chr1	148246207	148247112	906	*	77	0	0	4.22e-54	0	4.79867	2.65203	AC239809.2, AC239809.3	6.80904
chr8	6549580	6550486	907	*	63	0	0	6.88e-78	0	4.82231	2.19666	MCPH1, ANGPT2	6.81014
chr5	135049773	135050679	907	*	89	0	0	1.38e-36	0	4.14026	3.21099	C5orf66	6.81014
chr5	1513641	1514548	908	*	58	0	0	4.04e-71	0	7.18466	3.65711	LPCAT1	6.81124
chr21	45000441	45001349	909	*	54	0	3.73e-252	1.51e-25	0	3.5823	1.24598	PICSAR	6.81235
chr7	111727923	111728831	909	*	87	0	0	1.67e-43	0	3.03411	1.95866	DOCK4	6.81235
chr20	62959298	62960208	911	*	76	0	0	2.63e-28	0	-2.4626	-1.51338	SLC17A9	6.81454
chr8	140577972	140578883	912	*	64	0	0	7.28e-61	0	6.77307	1.30623	AGO2	6.81564
chr22	27614288	27615199	912	*	87	0	0	4.32e-57	0	4.26616	1.6721	intergenic	6.81564
chr5	72179065	72179976	912	*	50	0	0	6.19e-41	0	4.30524	1.78053	MAP1B	6.81564
chr17	81067679	81068591	913	*	62	0	0	5.41e-52	0	-4.17999	-1.33532	BAIAP2	6.81674
chr3	49133012	49133924	913	*	82	0	0	5.21e-21	0	2.5285	1.08068	LAMB2	6.81674
chr19	694728	695641	914	*	54	0	0	1.95e-52	0	-3.6917	-2.60065	PRSS57	6.81783
chr8	69941998	69942911	914	*	75	0	0	2.7e-73	0	4.15353	1.23158	intergenic	6.81783
chr1	2290367	2291281	915	*	76	0	0	1.35e-88	0	-7.59857	-5.57056	SKI	6.81892
chr20	21019722	21020638	917	*	82	0	0	4.3e-41	0	3.4954	1.53219	intergenic	6.82111
chr8	141146915	141147831	917	*	52	0	0	6.96e-82	0	8.61404	4.39688	DENND3	6.82111
chr7	155287499	155288416	918	*	58	0	0	1.85e-29	0	-3.76177	-1.22992	intergenic	6.8222
chr21	44293011	44293928	918	*	68	0	0	2.45e-59	0	6.36885	2.27721	AIRE	6.8222
chr6	28615877	28616795	919	*	99	0	0	1.61e-59	0	4.79368	2.33321	ZBED9	6.82329
chr12	124486440	124487361	922	*	54	0	0	1.36e-27	0	-3.03767	-1.18118	NCOR2	6.82655
chr11	69479962	69480884	923	*	54	0	0	2.9e-53	0	3.38468	1.01445	LINC02747	6.82763
chr13	112885394	112886316	923	*	60	0	0	1.89e-25	0	3.31243	1.38875	ATP11A	6.82763
chr8	102738529	102739452	924	*	60	0	0	1.4e-42	0	3.33053	1.81735	intergenic	6.82871
chr7	152366109	152367033	925	*	50	0	0	5.03e-50	0	4.09437	2.70322	AC104692.2, KMT2C	6.82979
chr11	70670380	70671306	927	*	78	0	0	6.75e-54	0	-3.41144	-1.48943	SHANK2	6.83195
chr4	183758159	183759085	927	*	57	0	0	2.48e-70	0	6.85014	2.75435	intergenic	6.83195
chr17	48526588	48527517	930	*	94	0	0	1.17e-43	0	-3.17298	-1.13761	intergenic	6.83518
chr21	44900799	44901728	930	*	59	0	0	3.93e-50	0	4.99887	2.57044	ITGB2	6.83518
chr1	3541138	3542068	931	*	50	0	0	1.89e-54	0	4.2881	1.31023	MEGF6	6.83626
chr2	131723375	131724305	931	*	60	0	0	9.9e-41	0	3.9975	2.07868	C2orf27A, NBEAP2, TOMM40P4	6.83626
chr2	120867231	120868162	932	*	92	0	0	8.96e-41	0	3.01473	1.48455	GLI2, AC017033.1	6.83733
chr17	82008357	82009289	933	*	84	0	0	1.5e-36	0	-3.68244	-1.01608	ASPSCR1	6.83841
chr1	235093121	235094053	933	*	70	0	0	2.13e-56	0	5.4974	2.29534	intergenic	6.83841
chr19	836533	837466	934	*	58	0	0	1.41e-19	0	-2.2472	-1.20834	intergenic	6.83948
chrX	119222823	119223756	934	*	51	0	0	3.74e-26	0	2.1483	1.28609	NUDT19P6	6.83948
chr1	8343481	8344415	935	*	87	0	0	5.15e-43	0	3.85804	1.40864	SLC45A1	6.84055
chr4	8208749	8209684	936	*	55	0	0	2.58e-68	0	-4.72865	-2.0194	SH3TC1	6.84162
chr5	43000171	43001107	937	*	81	0	0	3.35e-36	0	3.0063	1.85963	intergenic	6.84268
chr9	129340956	129341893	938	*	59	0	0	4.44e-55	0	5.29558	2.19912	LINC01503	6.84375
chr11	14258723	14259661	939	*	76	0	0	4.56e-22	0	1.85252	1.19338	SPON1	6.84482
chr6	1598284	1599222	939	*	77	0	0	1.16e-43	0	2.45765	1.3771	intergenic	6.84482
chr17	35596491	35597431	941	*	109	0	0	2.6e-32	0	2.57383	1.0597	AP2B1, AC004134.1	6.84694
chr19	56104469	56105411	943	*	54	0	1.2e-297	8.22e-46	0	-2.96387	-1.01948	ZNF787	6.84907
chr8	1130010	1130955	946	*	59	0	0	2.15e-78	0	7.43256	2.01954	DLGAP2	6.85224
chr6	10112571	10113516	946	*	52	0	0	7.34e-31	0	4.00495	2.4247	OFCC1	6.85224
chr1	204213786	204214732	947	*	84	0	0	6.07e-64	0	3.02361	1.11677	GOLT1A	6.8533
chr14	102523824	102524770	947	*	55	0	0	3.78e-21	0	2.1439	1.36662	intergenic	6.8533
chr4	7393032	7393978	947	*	63	0	0	1.77e-67	0	4.59259	1.75136	SORCS2	6.8533
chr19	19105547	19106497	951	*	56	0	0	4.5e-61	0	5.72833	3.68709	SLC25A42	6.85751
chr20	36540530	36541482	953	*	101	0	0	4.81e-65	0	5.78635	2.60101	DLGAP4-AS1	6.85961
chr11	70110865	70111819	955	*	50	0	0	5.99e-65	0	-3.79048	-2.01211	ANO1	6.86171
chr20	32560139	32561093	955	*	54	0	0	1.32e-57	0	-2.86077	-1.31269	AL133343.2, NOL4L	6.86171
chr20	50171684	50172638	955	*	74	0	0	8.29e-64	0	4.85119	1.04715	AL161937.1, LINC01273	6.86171
chr10	110529693	110530647	955	*	75	0	0	2.71e-38	0	3.9595	1.47818	intergenic	6.86171
chr14	20435207	20436161	955	*	75	0	0	2.29e-32	0	4.18405	2.70558	KLHL33	6.86171
chr10	74813379	74814333	955	*	80	0	0	4.59e-40	0	4.45248	3.12113	intergenic	6.86171
chr10	129707459	129708415	957	*	78	0	0	3.56e-50	0	-5.39077	-2.60194	MGMT	6.8638
chr10	132764736	132765692	957	*	64	0	0	2.06e-59	0	6.06505	4.37488	INPP5A	6.8638
chr21	46554537	46555499	963	*	61	0	0	1.69e-55	0	-4.11576	-1.08552	DIP2A	6.87005
chr13	89362558	89363520	963	*	97	0	0	1.15e-15	0	1.93508	1.30593	SP3P	6.87005
chr16	85586333	85587295	963	*	61	0	0	4.06e-53	0	3.56252	2.08228	GSE1	6.87005
chr13	110624791	110625754	964	*	71	0	0	7.3e-42	0	-3.4818	-1.65418	NAXD	6.87109
chr19	48194425	48195388	964	*	220	0	0	1.57e-25	0	2.02465	1.2409	ZSWIM9, CARD8	6.87109
chr4	3472679	3473645	967	*	61	0	0	3.03e-43	0	-4.33538	-2.24348	DOK7	6.8742
chr1	6385551	6386518	968	*	52	0	0	2.64e-55	0	5.01872	2.47244	ACOT7	6.87523
chr16	85696892	85697860	969	*	54	0	0	4.17e-46	0	-5.3161	-3.76588	C16orf74, AC018695.6	6.87626
chr8	22047950	22048918	969	*	117	0	0	4.31e-36	0	4.82336	2.46945	FGF17	6.87626
chr22	44167151	44168120	970	*	51	0	0	8.28e-78	0	6.09878	1.51118	PARVB	6.8773
chr12	123034225	123035195	971	*	54	0	0	1.42e-62	0	-4.42263	-2.56875	PITPNM2	6.87833
chr9	129664753	129665725	973	*	55	0	0	1.22e-30	0	2.78733	1.08479	PRRX2	6.88038
chr1	16520423	16521395	973	*	59	0	0	4.7e-45	0	3.8285	1.84073	AL137802.3, AL137802.1	6.88038
chr9	133528632	133529604	973	*	52	0	0	6.31e-48	0	4.15081	1.89463	intergenic	6.88038
chr11	62443986	62444959	974	*	60	0	0	6.23e-77	0	-5.94223	-2.55924	AHNAK	6.88141
chr10	92045140	92046113	974	*	94	0	0	3.56e-33	0	2.84175	1.85415	intergenic	6.88141
chr16	88264803	88265776	974	*	70	0	0	2.06e-68	0	7.61314	3.13684	AC138512.1	6.88141
chr1	12549176	12550151	976	*	75	0	0	1.33e-47	0	-4.37197	1.13174	intergenic	6.88346
chr7	73742815	73743790	976	*	75	0	0	1.87e-27	0	3.6508	2.6316	intergenic	6.88346
chr7	2531604	2532580	977	*	101	0	0	4.26e-57	0	-4.34922	-2.71737	intergenic	6.88449
chr19	2321013	2321990	978	*	70	0	0	8.65e-44	0	-3.64832	-1.61718	AC005258.1, LSM7	6.88551
chr4	116925885	116926862	978	*	106	0	0	1.54e-42	0	3.61179	1.21923	AC093765.3	6.88551
chr6	887058	888036	979	*	62	0	0	2.52e-32	0	2.53578	1.63664	intergenic	6.88653
chr16	27225734	27226713	980	*	60	0	0	5.64e-76	0	-5.5332	-2.93219	NSMCE1	6.88755
chr1	212665409	212666388	980	*	65	0	0	2.28e-46	0	3.75553	1.29485	LINC02773	6.88755
chr7	158432084	158433064	981	*	50	0	1.07e-245	7.81e-22	6.10989685041877e-316	-3.07476	-1.23817	PTPRN2	6.88857
chr11	62687415	62688395	981	*	130	0	0	1.16e-36	0	3.23847	1.89491	LRRN4CL	6.88857
chr12	3300238	3301219	982	*	52	0	0	3.83e-49	0	2.60211	1.02468	AC005865.2, AC005865.1	6.88959
chr8	142343369	142344352	984	*	54	0	5.8e-209	1.1e-29	0	-3.38915	-1.06957	TSNARE1	6.89163
chr5	65035004	65035987	984	*	151	0	0	6.36e-34	0	3.95857	1.08013	intergenic	6.89163
chr6	149456656	149457639	984	*	100	0	0	6.42e-54	0	3.97613	2.43214	ZC3H12D	6.89163
chr2	861498	862482	985	*	55	0	6.21e-291	1.56e-32	0	-3.64309	-1.1025	LINC01115	6.89264
chr22	19758632	19759617	986	*	97	0	0	2.29e-40	0	3.84987	2.02813	TBX1	6.89366
chr19	17079314	17080299	986	*	76	0	0	3.57e-52	0	4.71275	2.93738	MYO9B	6.89366
chr10	132685298	132686285	988	*	78	0	0	8.12e-81	0	-6.56646	-2.61377	INPP5A	6.89568
chrX	57137041	57138030	990	*	55	0	0	2e-21	0	2.07059	1.38951	SPIN2A	6.8977
chr10	11874853	11875842	990	*	55	0	0	1.22e-39	0	4.69057	2.46282	PROSER2-AS1	6.8977
chr7	92608061	92609050	990	*	54	0	0	8.47e-58	0	4.51982	3.33097	CDK6	6.8977
chr9	133968279	133969269	991	*	60	0	0	7.01e-54	0	-5.15034	-2.15099	VAV2	6.89871
chr16	1365424	1366416	993	*	64	0	0	1.87e-61	0	-4.263	-1.45748	UNKL	6.90073
chr1	200302148	200303140	993	*	76	0	0	7.87e-55	0	4.68331	1.31861	LINC00862	6.90073
chr17	236599	237594	996	*	68	0	0	7.25e-72	0	6.02948	2.14594	RPH3AL	6.90375
chr13	113449098	113450093	996	*	56	0	0	6.39e-59	0	4.91316	2.75927	ADPRHL1	6.90375
chrX	633992	634989	998	*	172	0	0	7.21e-41	0	-3.21735	-1.82712	SHOX	6.90575
chr19	2634248	2635245	998	*	68	0	0	1.24e-36	0	-3.18824	-1.76783	GNG7	6.90575
chr9	94331860	94332857	998	*	53	0	0	2.82e-19	0	2.33152	1.19566	AL691447.2	6.90575
chr2	70948409	70949406	998	*	70	0	0	3.28e-64	0	4.30405	1.23055	VAX2, ATP6V1B1, AC007040.2, ATP6V1B1-AS1	6.90575
chr6	168283453	168284450	998	*	59	0	0	9.02e-78	0	6.96764	1.69721	intergenic	6.90575
chr7	2508486	2509484	999	*	66	0	0	5.43e-93	0	-6.52615	-4.25094	intergenic	6.90675
chr9	137542565	137543564	1000	*	77	0	0	1.55e-48	0	2.57382	1.02881	PNPLA7	6.90776
chr2	201618861	201619860	1000	*	76	0	0	7.32e-31	0	2.40485	1.36304	C2CD6	6.90776
chr7	151687635	151688634	1000	*	50	0	0	1.22e-59	0	5.28009	2.19075	PRKAG2	6.90776
chr9	128099816	128100816	1001	*	56	0	0	3.06e-59	0	5.50237	1.99078	SLC25A25	6.90875
chr2	444461	445464	1004	*	68	0	0	7.48e-23	0	-2.41707	-1.00094	intergenic	6.91175
chr19	3720613	3721616	1004	*	53	0	0	7.58e-50	0	3.09667	1.06029	TJP3	6.91175
chr19	6463938	6464942	1005	*	112	0	0	2.87e-24	0	2.72544	1.04036	CRB3, SLC25A23	6.91274
chr16	2163377	2164381	1005	*	56	0	0	7.08e-58	0	5.83271	2.44915	TRAF7	6.91274
chr21	41678327	41679331	1005	*	50	0	0	4.24e-41	0	3.55629	2.57471	LINC00111	6.91274
chr2	164955196	164956200	1005	*	70	0	0	4.02e-67	0	5.27575	3.00429	AC019197.1, SLC38A11	6.91274
chr7	2571546	2572550	1005	*	54	0	0	8.35e-74	0	7.29456	3.46275	IQCE	6.91274
chr17	81265718	81266723	1006	*	51	0	1.05e-227	5.89e-29	0	-3.87635	-1.14055	SLC38A10	6.91374
chr19	993506	994511	1006	*	110	0	0	2.78e-67	0	5.7642	2.23693	WDR18	6.91374
chr4	8010435	8011441	1007	*	55	0	0	9.4e-35	0	-2.7607	-1.32026	ABLIM2	6.91473
chr9	132164360	132165367	1008	*	52	0	0	2.69e-36	0	3.61978	1.3571	NTNG2	6.91572
chr11	1667304	1668311	1008	*	53	0	0	4.74e-60	0	3.86605	1.55618	FAM99A	6.91572
chr1	44637345	44638353	1009	*	67	0	0	3.08e-36	0	-3.23585	-2.15333	RNF220, TMEM53	6.91672
chr9	35035729	35036737	1009	*	72	0	0	1.06e-21	0	2.12124	1.00579	intergenic	6.91672
chr5	10649230	10650239	1010	*	108	0	0	6.58e-22	0	3.50159	1.794	ANKRD33B	6.91771
chr12	111076651	111077660	1010	*	59	0	0	1.85e-58	0	4.60623	2.82954	CUX2	6.91771
chr18	13641473	13642483	1011	*	170	0	0	1.59e-46	0	2.77684	1.17378	LDLRAD4	6.9187
chr16	31042101	31043111	1011	*	115	0	0	1.08e-46	0	4.79098	3.09779	STX4	6.9187
chr10	64041222	64042233	1012	*	59	0	0	1.13e-42	0	3.09962	1.22373	AC013287.1	6.91968
chr2	101435033	101436044	1012	*	58	0	0	1.45e-25	0	3.67988	2.33601	RFX8	6.91968
chr11	67310594	67311605	1012	*	62	0	0	4.94e-55	0	6.74546	2.89513	SSH3	6.91968
chr3	184773127	184774138	1012	*	87	0	0	1.7e-76	0	8.77102	4.65522	LINC02069	6.91968
chr7	2680691	2681703	1013	*	53	0	0	2.09e-41	0	2.24227	1.0614	AMZ1	6.92067
chr2	127400470	127401482	1013	*	82	0	0	2.75e-63	0	6.83281	5.14787	MAP3K2-DT	6.92067
chr1	159900112	159901125	1014	*	53	0	0	8.4e-54	0	5.5161	1.73058	AL590560.5, CFAP45	6.92166
chr17	17993989	17995003	1015	*	58	0	0	7.21e-55	0	5.31351	2.07742	DRC3, ATPAF2	6.92264
chr6	170265744	170266759	1016	*	60	0	0	1.86e-77	0	-4.32607	-1.85607	AL109910.2	6.92363
chr10	69494096	69495112	1017	*	62	0	0	3.14e-42	0	-4.04857	-2.50261	TSPAN15	6.92461
chr19	4064043	4065059	1017	*	132	0	0	8.06e-43	0	4.65022	1.44684	ZBTB7A	6.92461
chr12	124814310	124815327	1018	*	70	0	0	2.96e-77	0	-6.39815	-2.43837	SCARB1	6.9256
chr8	144623535	144624552	1018	*	78	0	0	2.17e-58	0	5.78591	1.50965	intergenic	6.9256
chr12	12926704	12927721	1018	*	58	0	0	9.15e-71	0	6.86591	2.5814	intergenic	6.9256
chr12	30169755	30170773	1019	*	89	0	0	2.59e-33	0	3.13966	1.0647	AC023511.2	6.92658
chr13	111327898	111328917	1020	*	71	0	0	5.85e-51	0	-4.03288	-1.15765	TEX29	6.92756
chr19	38417704	38418723	1020	*	106	0	0	1e-31	0	3.9859	1.32159	RASGRP4	6.92756
chr19	3057461	3058482	1022	*	58	0	0	1.17e-54	0	-4.08089	-2.00756	TLE5	6.92952
chr16	88186358	88187379	1022	*	114	0	0	6.52e-58	0	3.82526	1.27892	LINC02182, AC134312.5	6.92952
chr10	69232444	69233465	1022	*	55	0	0	1.48e-74	0	7.75274	3.71182	HKDC1, AL596223.1	6.92952
chr15	64911276	64912298	1023	*	158	0	0	3.5e-52	0	3.19024	1.07762	AC069368.1, ANKDD1A	6.93049
chr19	52492393	52493415	1023	*	61	0	8.05e-297	3.87e-50	0	3.76358	1.12267	ZNF578	6.93049
chr1	91546155	91547179	1025	*	111	0	0	3.77e-33	0	-2.74779	1.29823	intergenic	6.93245
chr15	78800196	78801220	1025	*	74	0	0	1.5e-27	0	2.30958	1.77359	ADAMTS7	6.93245
chr5	91188	92213	1026	*	122	0	0	1.52e-48	0	5.23668	1.18209	PLEKHG4B	6.93342
chr21	44989980	44991005	1026	*	108	0	0	9.3e-81	0	6.76921	1.25091	LINC00163	6.93342
chr10	5596117	5597143	1027	*	52	0	0	3.13e-80	0	7.44872	5.15222	LASTR	6.9344
chr20	62811500	62812527	1028	*	87	0	0	3.86e-27	0	-2.95784	-1.07202	OGFR	6.93537
chr1	226127159	226128186	1028	*	52	0	0	5.71e-27	0	2.94357	2.2545	AL512343.1	6.93537
chr20	4180912	4181940	1029	*	59	0	1.62e-288	4.3e-40	0	-3.27469	-1.03987	SMOX	6.93634
chr19	10587013	10588041	1029	*	63	0	0	4.05e-30	0	3.95497	2.03672	AP1M2	6.93634
chr4	185513838	185514869	1032	*	54	0	0	5.1e-64	0	-4.58155	-1.15717	PDLIM3	6.93925
chr17	83152464	83153495	1032	*	168	0	0	4.77e-79	0	6.05565	1.14313	AC139099.2	6.93925
chr15	62952589	62953621	1033	*	62	0	0	1.98e-39	0	-2.94309	-1.62363	AC079328.1	6.94022
chr21	46378315	46379348	1034	*	60	0	0	1.18e-43	0	-2.89797	-1.06408	PCNT	6.94119
chr19	1070778	1071812	1035	*	216	0	0	3.37e-30	0	4.14645	3.62171	ARHGAP45	6.94216
chr10	131098633	131099667	1035	*	51	0	0	2.5e-67	0	7.0958	4.94842	TCERG1L	6.94216
chr10	43361852	43362887	1036	*	137	0	0	9.21e-60	0	4.4738	1.19543	intergenic	6.94312
chr19	45216859	45217894	1036	*	96	0	0	1.88e-52	0	3.83331	2.05261	MARK4, BLOC1S3, EXOC3L2	6.94312
chr22	39685514	39686549	1036	*	139	0	0	7.33e-56	0	5.47856	3.41989	CACNA1I	6.94312
chr8	1144462	1145498	1037	*	54	0	0	6.28e-39	0	-3.9671	-2.30202	DLGAP2	6.94409
chr16	87918481	87919517	1037	*	56	0	0	2.05e-55	0	3.59814	1.00214	CA5A	6.94409
chr11	3232340	3233376	1037	*	103	0	0	2.16e-58	0	4.33184	2.24693	AC109309.1, MRGPRE	6.94409
chr17	36721759	36722796	1038	*	68	0	0	1.01e-70	0	-4.92556	-1.02189	AC243830.1	6.94505
chr19	37334079	37335116	1038	*	116	0	0	3.55e-37	0	3.49961	1.2236	ZNF875	6.94505
chr9	13322707	13323745	1039	*	56	0	0	1.24e-33	0	-3.5004	-1.69126	AL162386.1	6.94601
chr6	44727457	44728495	1039	*	58	0	0	3.33e-69	0	3.66668	1.44137	AL133334.1	6.94601
chr20	62963961	62965000	1040	*	85	0	0	8.6e-57	0	-3.72773	-1.31195	SLC17A9	6.94698
chr3	98657376	98658415	1040	*	64	0	0	2.24e-32	0	2.66333	1.66273	WWP1P1	6.94698
chr6	168035123	168036163	1041	*	87	0	0	1.25e-43	0	3.14406	1.20456	KIF25	6.94794
chr17	74919435	74920475	1041	*	177	0	0	8.93e-38	0	2.70237	1.3449	USH1G	6.94794
chr2	112137603	112138644	1042	*	118	0	0	1.74e-37	0	3.18695	1.02949	FBLN7	6.9489
chr1	211415796	211416837	1042	*	138	0	0	4.6e-12	0	1.87423	1.29321	LINC00467	6.9489
chr4	1978345	1979389	1045	*	112	0	0	3.05e-43	0	-3.94256	-1.65849	NSD2	6.95177
chr11	126327335	126328379	1045	*	63	0	0	1.54e-54	0	-5.04217	-1.49718	DCPS	6.95177
chr6	148964528	148965572	1045	*	65	0	0	9.91e-25	0	-2.33984	-1.03009	UST, UST-AS1	6.95177
chr6	35485860	35486904	1045	*	122	0	0	3.33e-33	0	4.55825	4.10232	TEAD3	6.95177
chr16	2690269	2691314	1046	*	86	0	0	1.18e-37	0	-3.50327	-1.75171	KCTD5	6.95273
chrX	136097756	136098801	1046	*	82	0	0	1.31e-40	0	3.07024	1.02272	E2F6P4	6.95273
chr22	29825187	29826235	1049	*	54	0	0	6.06e-40	0	-2.52205	-1.21318	ASCC2	6.95559
chr10	132773580	132774628	1049	*	60	0	0	2.62e-32	0	-2.1358	-1.15066	INPP5A	6.95559
chr7	143391345	143392393	1049	*	56	0	0	1.26e-74	0	7.55075	2.13458	EPHA1	6.95559
chr7	665231	666281	1051	*	52	0	0	4.82e-33	0	2.41677	1.08797	PRKAR1B	6.9575
chr16	89343777	89344829	1053	*	63	0	0	1.12e-28	0	-2.95097	-1.4817	ANKRD11	6.9594
chr16	3880844	3881896	1053	*	163	0	0	1.16e-53	0	5.26267	1.82439	intergenic	6.9594
chr19	6821573	6822625	1053	*	55	0	0	2.44e-52	0	3.47645	1.83525	VAV1	6.9594
chr21	45294290	45295342	1053	*	82	0	0	6.19e-71	0	6.81097	3.2991	LINC00205	6.9594
chr2	3059307	3060360	1054	*	105	0	0	1.46e-62	0	5.42312	1.35804	LINC01250	6.96035
chr13	26742277	26743330	1054	*	62	0	0	4.93e-41	0	3.13568	1.43926	intergenic	6.96035
chr21	45335679	45336733	1055	*	52	0	0	8.32e-74	0	5.07682	1.52529	BX322557.1	6.9613
chr7	63789679	63790735	1057	*	100	0	0	9.4e-17	0	1.58886	1.0024	AC079355.2	6.96319
chr2	69713851	69714908	1058	*	52	0	0	2.97e-61	0	4.1109	1.13817	ANXA4	6.96414
chr2	231680637	231681694	1058	*	159	0	0	2.02e-43	0	4.29238	1.43913	intergenic	6.96414
chr20	37395285	37396342	1058	*	64	0	0	1.39e-57	0	5.05157	2.8871	SRC	6.96414
chr17	3944536	3945594	1059	*	96	0	0	5.08e-39	0	4.56057	3.36103	ATP2A3	6.96508
chr16	29177245	29178304	1060	*	66	0	0	3.92e-67	0	6.21108	4.45824	AC009093.11, AC009093.8, AC009093.10, AC009093.2	6.96602
chr7	4714820	4715880	1061	*	64	0	0	2.53e-88	0	-8.84574	-6.20258	FOXK1	6.96697
chr2	232890884	232891945	1062	*	60	0	0	3.09e-41	0	-4.28653	-1.07878	NGEF	6.96791
chr12	131734214	131735276	1063	*	64	0	0	4.23e-49	0	-4.77712	-1.21002	SFSWAP	6.96885
chr10	79381572	79382634	1063	*	68	0	0	4.36e-64	0	4.38513	1.81948	AL133481.1, ZCCHC24	6.96885
chr17	81647768	81648831	1064	*	139	0	0	3.05e-27	0	2.92673	1.24944	TSPAN10, NPLOC4	6.96979
chr12	113092650	113093713	1064	*	87	0	0	4.27e-40	0	2.88496	1.26199	DTX1	6.96979
chr8	48318537	48319600	1064	*	70	0	0	1.45e-73	0	5.64993	2.15807	intergenic	6.96979
chr10	130833721	130834784	1064	*	90	0	0	1.29e-72	0	5.7101	2.47422	intergenic	6.96979
chr9	127877442	127878507	1066	*	106	0	0	1.6e-32	0	3.19669	1.08388	AK1, AL157935.2	6.97167
chr17	6893425	6894491	1067	*	84	0	0	1.51e-42	0	3.18701	1.67264	ALOX12P2, ALOX12-AS1	6.97261
chr13	22735537	22736604	1068	*	82	0	0	1.5e-57	0	5.60182	2.59416	intergenic	6.97354
chr10	624621	625688	1068	*	90	0	0	9.67e-74	0	6.62554	4.30563	DIP2C	6.97354
chr5	1015675	1016743	1069	*	88	0	0	3.89e-48	0	-5.14776	-2.0868	NKD2	6.97448
chr4	8867300	8868369	1070	*	209	0	0	7.68e-43	0	3.84304	1.21648	HMX1	6.97541
chr16	324512	325582	1071	*	127	0	0	3.18e-47	0	-4.01037	-2.71084	AXIN1	6.97635
chr9	95752117	95753187	1071	*	60	0	8.35e-291	3.62e-17	3.47e-287	1.75366	1.02339	intergenic	6.97635
chr1	27005684	27006754	1071	*	106	0	0	1.63e-63	0	7.75889	2.77446	TENT5B	6.97635
chr6	2890941	2892012	1072	*	50	0	0	1.37e-35	0	-2.82353	-1.50387	SERPINB9	6.97728
chr2	7766537	7767608	1072	*	71	0	5.49e-242	1.35e-67	0	6.12166	1.16833	intergenic	6.97728
chr2	87583919	87584990	1072	*	72	0	0	2.4e-65	0	4.53931	1.37551	CYTOR, AC133644.2	6.97728
chr19	55549502	55550573	1072	*	63	0	0	2.61e-79	0	8.04427	4.03065	intergenic	6.97728
chr9	130478831	130479903	1073	*	80	0	0	1.82e-52	0	-4.90381	-2.48945	ASS1	6.97821
chr2	10777457	10778529	1073	*	75	0	0	2.06e-50	0	-4.51327	-1.79441	ATP6V1C2	6.97821
chr2	25339642	25340715	1074	*	69	0	0	1.08e-26	0	3.78979	1.37336	DNMT3A	6.97915
chr7	1322931	1324006	1076	*	129	0	0	1.59e-62	0	-4.29731	-1.63139	intergenic	6.98101
chr22	31126695	31127770	1076	*	74	0	0	3.66e-43	0	3.8041	1.25574	INPP5J	6.98101
chr5	173972758	173973834	1077	*	72	0	0	2.04e-45	0	3.56831	1.04906	C5orf47	6.98193
chr17	82970471	82971548	1078	*	161	0	0	4.95e-58	0	-4.44821	-1.57466	B3GNTL1	6.98286
chr8	48910572	48911649	1078	*	62	0	0	7.28e-83	0	-7.20118	-1.01694	intergenic	6.98286
chr1	119327207	119328284	1078	*	86	0	0	7.51e-30	0	2.43625	1.01019	LINC01780, AL359915.1	6.98286
chr16	75535082	75536159	1078	*	92	0	0	1.41e-38	0	-2.68578	1.12509	AC009163.3, CHST5	6.98286
chr1	27575149	27576228	1080	*	153	0	0	6.28e-34	0	4.25027	1.10745	AHDC1	6.98472
chr10	132407998	132409077	1080	*	82	0	0	1.7e-28	0	3.64191	1.58852	PWWP2B	6.98472
chr1	59146711	59147790	1080	*	119	0	0	1.86e-87	0	6.76603	2.03123	LINC01358, HSD52	6.98472
chr19	735414	736494	1081	*	67	0	0	5.7e-21	0	-1.98634	-1.09083	PALM	6.98564
chr17	81982426	81983506	1081	*	56	0	0	8.69e-76	0	6.21711	1.98204	ASPSCR1	6.98564
chr11	65478866	65479946	1081	*	73	0	0	8.66e-69	0	5.8984	4.10349	intergenic	6.98564
chr2	120238969	120240049	1081	*	64	0	0	1.51e-68	0	6.63111	4.15775	intergenic	6.98564
chr22	46374143	46375225	1083	*	102	0	0	3.88e-99	0	-9.15061	-3.18488	CELSR1	6.98749
chr10	2772811	2773893	1083	*	85	0	0	1.23e-42	0	-5.12054	-1.6473	intergenic	6.98749
chr16	89003434	89004516	1083	*	81	0	0	4.06e-29	0	-3.05762	-1.38139	intergenic	6.98749
chr7	157568333	157569416	1084	*	91	0	0	7.55e-68	0	-3.9416	-1.08719	PTPRN2	6.98841
chr12	51721328	51722411	1084	*	96	0	0	3.15e-57	0	3.66004	1.46073	SCN8A	6.98841
chr11	20207862	20208945	1084	*	83	0	0	1.69e-29	0	2.541	1.58274	intergenic	6.98841
chr20	1993822	1994906	1085	*	56	0	0	8.16e-39	0	-2.43088	-1.16438	PDYN-AS1, PDYN	6.98934
chr2	628141	629225	1085	*	58	0	0	8.06e-57	0	3.78863	1.41693	intergenic	6.98934
chr10	116324009	116325093	1085	*	65	0	0	7.95e-44	0	2.61284	1.52582	CCDC172	6.98934
chr15	57306313	57307398	1086	*	131	0	0	7.37e-55	0	2.99792	1.02667	LINC00926	6.99026
chr10	131453237	131454322	1086	*	105	0	0	8.43e-38	0	2.86128	1.24226	intergenic	6.99026
chr17	61416597	61417682	1086	*	77	0	0	5.15e-75	0	4.7931	1.46696	intergenic	6.99026
chr19	11418406	11419491	1086	*	125	0	0	1.13e-55	0	4.29848	1.49499	RGL3	6.99026
chr13	110869593	110870680	1088	*	64	0	0	1.39e-67	0	6.48013	3.86268	PRECSIT	6.9921
chr14	102949029	102950117	1089	*	64	0	0	3.66e-54	0	-3.73497	-2.02252	CDC42BPB	6.99302
chr9	137464796	137465885	1090	*	80	0	0	2.34e-53	0	3.08806	1.0625	PNPLA7	6.99393
chr8	48658838	48659930	1093	*	92	0	0	4.45e-33	0	-3.24888	-2.03605	AC022915.2, AC022915.3	6.99668
chr17	41548114	41549206	1093	*	53	0	0	6.18e-34	0	4.16296	1.23728	intergenic	6.99668
chr11	2171743	2172835	1093	*	75	0	0	3.08e-67	0	5.96056	2.65376	TH	6.99668
chr1	222454676	222455769	1094	*	63	0	0	8.01e-76	0	6.33174	2.50173	AL513314.1	6.9976
chr19	38596093	38597186	1094	*	96	0	0	8.16e-35	0	4.40649	3.22437	AC008649.1, MAP4K1	6.9976
chr5	2278269	2279363	1095	*	59	0	0	1.37e-57	0	5.41997	2.96285	intergenic	6.99851
chr11	68035594	68036689	1096	*	66	0	0	8.82e-31	0	-3.68956	-1.80434	NDUFS8	6.99942
chr17	72539636	72540731	1096	*	100	0	0	2.62e-46	0	3.74658	1.08364	LINC00511	6.99942
chr6	125758985	125760080	1096	*	88	0	0	1.28e-54	0	3.83883	1.24568	HEY2	6.99942
chr3	196948261	196949357	1097	*	56	0	0	6.9e-34	0	-2.98332	1.20379	PIGZ	7.00033
chr17	40093012	40094109	1098	*	64	0	0	2.85e-60	0	5.77625	2.2023	THRA, NR1D1	7.00125
chr12	124445006	124446104	1099	*	100	0	0	1.92e-56	0	-4.77808	-1.97382	NCOR2	7.00216
chr20	62285593	62286691	1099	*	75	0	0	3.2e-58	0	4.16656	1.47117	OSBPL2	7.00216
chr16	29132594	29133692	1099	*	59	0	0	3.38e-50	0	3.90421	2.01252	AC009093.11, AC009093.8	7.00216
chr4	40842289	40843388	1100	*	54	0	0	1.62e-57	0	4.89554	1.83234	APBB2	7.00307
chr2	25639012	25640112	1101	*	58	0	0	4.71e-50	0	3.65805	1.13297	DTNB	7.00397
chr10	133005132	133006234	1103	*	58	0	0	2.57e-51	0	-3.05055	-1.06299	intergenic	7.00579
chr15	77999349	78000451	1103	*	82	0	0	1.74e-70	0	-3.84237	-1.02291	TBC1D2B	7.00579
chr8	143420533	143421636	1104	*	112	0	0	2.73e-41	0	4.63408	2.58718	MAFA	7.0067
chr17	78174660	78175764	1105	*	64	0	0	5.17e-65	0	-6.06747	-1.62956	TK1	7.0076
chrX	154516402	154517507	1106	*	83	0	0	4.08e-28	0	3.40436	1.15794	intergenic	7.00851
chr3	80770231	80771336	1106	*	87	0	0	1.44e-45	0	3.61321	1.28524	LINC02050, AC068756.1	7.00851
chr10	131928857	131929962	1106	*	51	0	0	4.3e-60	0	4.55761	1.52445	PPP2R2D	7.00851
chr21	46150517	46151623	1107	*	103	0	0	3.89e-44	0	2.87717	1.0433	FTCD-AS1, FTCD	7.00941
chr7	155961435	155962542	1108	*	50	0	0	6.12e-57	0	-4.37064	-2.66729	intergenic	7.01031
chr10	1466786	1467893	1108	*	51	0	0	2.55e-53	0	-4.17144	-1.38741	ADARB2	7.01031
chr19	834415	835522	1108	*	69	0	0	2.71e-54	0	-2.73863	-1.03834	intergenic	7.01031
chr2	239026877	239027984	1108	*	66	0	0	1.28e-58	0	4.71441	1.87175	intergenic	7.01031
chr16	2022762	2023870	1109	*	79	0	0	1.85e-69	0	4.66029	1.10041	intergenic	7.01121
chr13	22848548	22849656	1109	*	84	0	0	2.98e-71	0	5.25656	2.59272	intergenic	7.01121
chr11	64796444	64797554	1111	*	54	0	0	5.61e-44	0	-3.44279	-1.54108	MAP4K2	7.01302
chr8	143507769	143508880	1112	*	73	0	0	1.48e-56	0	-4.26413	-1.58708	ZC3H3	7.01392
chr8	1325492	1326604	1113	*	54	0	0	1.79e-37	0	-3.70794	-1.58422	DLGAP2	7.01481
chr8	142304798	142305911	1114	*	76	0	0	1.47e-37	0	-4.19874	-2.60945	TSNARE1	7.01571
chr5	2642339	2643452	1114	*	64	0	0	1.44e-19	0	-2.86171	-1.14284	intergenic	7.01571
chr11	2791185	2792298	1114	*	181	0	0	2.15e-70	0	6.17818	1.65042	KCNQ1	7.01571
chr12	3453840	3454954	1115	*	69	0	0	7.11e-58	0	-5.2003	-1.03532	PRMT8	7.01661
chr5	180388974	180390088	1115	*	84	0	0	4.66e-43	0	2.79099	1.13103	intergenic	7.01661
chr9	96924675	96925789	1115	*	69	0	0	1.62e-27	0	2.20987	1.44733	MFSD14C	7.01661
chr17	81840674	81841790	1117	*	61	0	0	7.38e-49	0	-3.5295	-1.64835	intergenic	7.0184
chr19	34838223	34839339	1117	*	91	0	0	1.11e-49	0	3.85121	2.15443	AC008555.2	7.0184
chr15	66039398	66040517	1120	*	63	0	0	3.98e-57	0	4.50629	2.47619	MIR4311, MEGF11	7.02108
chr6	157147897	157149016	1120	*	53	0	0	1.68e-46	0	3.82912	2.58465	ARID1B	7.02108
chr7	50092944	50094064	1121	*	101	0	0	8.32e-37	0	2.18949	1.0593	AC034148.1, ZPBP	7.02198
chr16	49464978	49466098	1121	*	96	0	0	1.06e-53	0	4.35892	2.32553	intergenic	7.02198
chr19	10624733	10625853	1121	*	99	0	0	9.28e-35	0	4.52639	3.7429	SLC44A2	7.02198
chr16	85124084	85125205	1122	*	56	0	0	5.1e-65	0	4.59671	3.04164	intergenic	7.02287
chr3	52494422	52495544	1123	*	77	0	0	2.79e-33	0	-3.39453	-1.92527	STAB1	7.02376
chr11	71498180	71499302	1123	*	54	0	0	1.63e-28	0	-3.60695	-1.52763	NADSYN1	7.02376
chr1	2451143	2452265	1123	*	60	0	0	2.65e-59	0	4.43026	2.0774	PLCH2	7.02376
chr13	23695111	23696234	1124	*	139	0	0	1.77e-53	0	4.07874	1.5212	intergenic	7.02465
chr2	231400254	231401379	1126	*	50	0	0	8.76e-43	0	3.65335	1.0718	B3GNT7	7.02643
chr9	134783425	134784552	1128	*	60	0	0	5.02e-69	0	-5.58077	-2.57905	COL5A1	7.0282
chr2	23616810	23617937	1128	*	70	0	0	9.04e-60	0	-5.70181	-2.04542	KLHL29, AC011239.2	7.0282
chr15	100849018	100850145	1128	*	122	0	0	2.23e-17	0	2.06585	1.03491	AC015712.1, AC015712.6	7.0282
chr11	64266466	64267593	1128	*	54	0	0	2.14e-53	0	5.67256	2.60691	PLCB3	7.0282
chr1	228370491	228371620	1130	*	70	0	0	2.99e-42	0	-4.64817	-2.42266	OBSCN	7.02997
chr6	158033336	158034465	1130	*	56	0	7.47e-304	2.64e-45	0	-4.6981	-1.15328	SYNJ2	7.02997
chr3	128432296	128433425	1130	*	97	0	0	5.23e-59	0	5.95049	1.38745	intergenic	7.02997
chr20	1312915	1314044	1130	*	111	0	0	2.6e-46	0	3.31963	1.98986	SDCBP2	7.02997
chr6	3269267	3270397	1131	*	67	0	0	1.47e-75	0	-6.0231	-1.95303	PSMG4, SLC22A23	7.03086
chr16	751372	752502	1131	*	53	0	4.36e-295	4.27e-33	0	-3.76859	-1.06308	intergenic	7.03086
chr13	33610476	33611607	1132	*	82	0	0	7.57e-45	0	-5.37592	-3.58021	AL161719.1, AL139383.1	7.03174
chr12	51914446	51915577	1132	*	69	0	0	5.63e-52	0	3.11769	1.90123	ACVRL1	7.03174
chr17	63988793	63989924	1132	*	62	0	0	1.9e-62	0	4.77128	2.19288	AC127029.2	7.03174
chr22	30238043	30239174	1132	*	62	0	0	7.49e-71	0	6.52763	3.05063	intergenic	7.03174
chr7	45000509	45001641	1133	*	59	0	1.23e-300	1.55e-33	0	3.57291	1.19772	CCM2	7.03262
chr11	295553	296685	1133	*	52	0	0	5.15e-73	0	6.01451	1.61431	PGGHG	7.03262
chr5	179194966	179196100	1135	*	80	0	0	6.81e-61	0	4.83923	1.62509	ADAMTS2	7.03439
chr10	121531301	121532436	1136	*	50	0	0	1.34e-59	0	-4.54912	-2.59432	FGFR2	7.03527
chr7	75835030	75836165	1136	*	65	0	0	2.36e-73	0	8.17993	5.76172	AC005102.1	7.03527
chr5	172114822	172115958	1137	*	58	0	0	4.6e-29	0	-3.81516	-3.27894	STK10	7.03615
chr2	126976303	126977439	1137	*	66	0	0	2.9e-41	0	-4.35325	-2.13331	intergenic	7.03615
chr17	4177894	4179030	1137	*	70	0	0	1.59e-30	0	-4.12816	-1.74905	CYB5D2, ANKFY1	7.03615
chr7	75966644	75967781	1138	*	53	0	0	9.75e-47	0	-4.11614	-1.13981	POR	7.03703
chr2	237868911	237870049	1139	*	50	0	0	5.28e-57	0	-5.64397	-2.19217	RAMP1, SNORD39	7.03791
chr6	168705593	168706731	1139	*	52	0	0	6.97e-67	0	5.27592	1.26667	intergenic	7.03791
chrX	1465541	1466679	1139	*	204	0	0	1.58e-25	0	3.09935	2.08319	P2RY8	7.03791
chr12	54106343	54107482	1140	*	54	0	0	3.69e-77	0	-6.07765	-1.67041	FLJ12825, FAM242C	7.03878
chr2	96838953	96840092	1140	*	106	0	0	1.37e-39	0	-3.08259	-1.13782	ANKRD23, ANKRD39	7.03878
chr12	125982778	125983917	1140	*	70	0	0	1.38e-67	0	5.15852	1.29272	LINC02826, LINC00939	7.03878
chr15	28918168	28919307	1140	*	55	0	0	8.91e-46	0	3.18808	1.54686	APBA2	7.03878
chr10	124589623	124590763	1141	*	50	0	0	1.98e-51	0	-5.73723	-3.48265	LHPP	7.03966
chr5	154493129	154494269	1141	*	65	0	0	1.03e-59	0	-3.67655	-2.52648	AC026688.1	7.03966
chr1	212558031	212559171	1141	*	158	0	0	1.78e-66	0	6.43296	1.09893	AC092803.1	7.03966
chr15	98707183	98708323	1141	*	74	0	0	7.28e-58	0	5.29517	1.17771	IGF1R	7.03966
chr6	12585160	12586300	1141	*	54	0	0	4.1e-56	0	5.33397	2.13972	LINC02530	7.03966
chr22	37633416	37634557	1142	*	63	0	0	6.45e-50	0	-3.42734	-1.92254	GGA1	7.04054
chr11	2920806	2921948	1143	*	54	0	0	1.09e-71	0	5.66621	1.73389	SLC22A18	7.04141
chr9	35675371	35676515	1145	*	138	0	0	9.06e-46	0	3.77092	1.1202	CA9, ARHGEF39	7.04316
chr16	88092933	88094078	1146	*	74	0	0	4.74e-70	0	6.73007	3.44567	AC134312.1	7.04403
chr20	63972963	63974109	1147	*	59	0	0	2.17e-40	0	4.82383	1.415	intergenic	7.04491
chr19	5058756	5059903	1148	*	52	0	0	3.45e-55	0	-5.54297	-3.31131	KDM4B	7.04578
chr11	67464267	67465414	1148	*	64	0	0	1.09e-53	0	3.69338	1.00921	TMEM134	7.04578
chr18	35949450	35950597	1148	*	113	0	0	1.76e-38	0	3.54884	1.01976	intergenic	7.04578
chr19	3547930	3549079	1150	*	82	0	0	1.29e-34	0	-3.92794	-1.47445	AC005786.3, MFSD12	7.04752
chr5	619242	620392	1151	*	76	0	0	7.91e-32	0	-3.45928	-1.08549	CEP72	7.04839
chr3	142947260	142948410	1151	*	90	0	0	3.69e-61	0	4.80498	1.7455	intergenic	7.04839
chr16	69932737	69933888	1152	*	60	0	0	4.07e-28	0	-3.43059	-1.62105	WWP2, MIR140	7.04925
chr7	556376	557528	1153	*	80	0	0	3.78e-28	0	-2.97187	-1.27002	PRKAR1B	7.05012
chr6	38177304	38178456	1153	*	61	0	0	1.45e-64	0	4.79605	2.73491	BTBD9	7.05012
chr20	63831584	63832737	1154	*	287	0	0	3.14e-33	0	4.28503	1.05901	ZBTB46	7.05099
chr17	41586667	41587821	1155	*	50	0	0	2.34e-66	0	6.3929	3.4392	KRT14	7.05186
chr8	104329267	104330422	1156	*	54	0	1.57e-267	4.92e-18	3.45e-277	-1.92207	-1.03906	DPYS	7.05272
chr16	49838411	49839566	1156	*	131	0	0	1.56e-64	0	5.60833	1.21558	ZNF423	7.05272
chr15	65361573	65362729	1157	*	77	0	0	2.4e-52	0	-3.05336	-1.81256	IGDCC3	7.05359
chr13	110387508	110388665	1158	*	54	0	0	1.11e-32	0	3.56643	1.57271	COL4A2	7.05445
chr2	120465944	120467102	1159	*	55	0	0	1.52e-29	0	3.565	2.19963	LINC01101	7.05531
chr2	96549328	96550486	1159	*	104	0	0	1.4e-58	0	5.16655	3.67516	ARID5A	7.05531
chr17	78971531	78972690	1160	*	55	0	0	5.65e-53	0	3.88793	1.47378	LGALS3BP	7.05618
chr7	74452624	74453784	1161	*	53	0	9.15e-284	3.82e-60	0	4.79356	1.1581	intergenic	7.05704
chr13	114023807	114024968	1162	*	86	0	0	6.84e-57	0	-4.5893	-1.53776	RASA3	7.0579
chr17	863994	865155	1162	*	65	0	8e-307	6.45e-57	0	-4.58848	-1.10849	NXN	7.0579
chr15	42035629	42036790	1162	*	70	0	0	9.52e-63	0	-3.91246	1.83114	PLA2G4E	7.0579
chr17	746814	747976	1163	*	62	0	0	4.65e-61	0	-4.97916	-1.28588	GEMIN4	7.05876
chr10	682953	684115	1163	*	71	0	0	1.92e-58	0	4.679	1.19337	DIP2C	7.05876
chr1	2372516	2373678	1163	*	55	0	0	1.57e-79	0	8.70904	3.81187	MORN1	7.05876
chr17	44176596	44177759	1164	*	114	0	0	7.24e-55	0	3.81677	1.27061	ASB16, ASB16-AS1	7.05962
chr20	4760681	4761845	1165	*	106	0	0	1.33e-73	0	6.10656	1.52336	AL133396.1	7.06048
chr17	2795644	2796809	1166	*	89	0	0	2.28e-23	0	-3.40392	-2.0253	RAP1GAP2	7.06133
chr7	73424053	73425219	1167	*	66	0	0	2.39e-47	0	3.81935	1.38995	intergenic	7.06219
chr9	33465163	33466330	1168	*	57	0	0	7.92e-36	0	-3.06869	-1.18143	NOL6	7.06305
chr7	102079533	102080701	1169	*	80	0	0	9e-33	0	-2.86461	-1.41119	CUX1	7.0639
chr11	2273454	2274622	1169	*	60	0	0	4.37e-72	0	5.01828	1.26623	intergenic	7.0639
chr21	44368919	44370087	1169	*	74	0	0	6.33e-26	0	3.3792	1.28339	TRPM2	7.0639
chr16	89194208	89195378	1171	*	50	0	0	3.66e-20	0	-2.74671	-1.25658	CDH15	7.06561
chr10	33005337	33006507	1171	*	70	0	0	5.06e-53	0	4.60605	2.66942	ITGB1-DT, ITGB1	7.06561
chr12	1936170	1937341	1172	*	58	0	0	1.85e-42	0	-4.59025	-1.3358	LINC00940	7.06647
chr18	63475935	63477106	1172	*	58	0	3.24e-277	6.42e-29	0	-3.60013	-1.11272	SERPINB5	7.06647
chr16	88143094	88144265	1172	*	67	0	0	2.48e-63	0	5.0966	1.81146	intergenic	7.06647
chr19	5831159	5832331	1173	*	79	0	0	4.53e-51	0	3.37878	1.13968	FUT6	7.06732
chr1	14944899	14946071	1173	*	54	0	0	6.63e-55	0	4.31172	3.20447	KAZN	7.06732
chr3	2510496	2511669	1174	*	50	0	0	3.09e-38	0	-2.87797	-1.33245	CNTN4	7.06817
chr12	52151473	52152646	1174	*	104	0	0	2.29e-30	0	3.51401	1.17966	intergenic	7.06817
chr6	45663015	45664188	1174	*	178	0	0	3.84e-43	0	4.01267	1.83741	RUNX2	7.06817
chr11	95037194	95038368	1175	*	105	0	0	1.64e-27	0	1.97518	1.28435	AP002383.3	7.06902
chr1	3397794	3398968	1175	*	50	0	0	2.03e-37	0	2.67849	1.32679	PRDM16	7.06902
chr18	80159531	80160705	1175	*	235	0	0	3.9e-20	0	2.37662	1.48285	PARD6G-AS1, PARD6G	7.06902
chr17	3794621	3795795	1175	*	55	0	0	1.47e-69	0	4.76929	2.33007	ITGAE	7.06902
chr9	96048248	96049423	1176	*	56	0	0	5.76e-40	0	-3.67581	-1.60471	ERCC6L2	7.06987
chr17	850070	851246	1177	*	57	0	0	3.45e-40	0	-3.60569	-1.23277	NXN	7.07072
chr16	70725119	70726295	1177	*	52	0	0	2.77e-63	0	5.5891	1.63714	VAC14	7.07072
chr1	148263905	148265081	1177	*	50	0	0	1.64e-67	0	5.47845	2.83411	intergenic	7.07072
chr12	116558553	116559730	1178	*	55	0	4.11e-268	1.16e-63	0	-4.80612	-1.18541	MAP1LC3B2	7.07157
chrX	10015759	10016936	1178	*	91	0	0	5.7e-24	0	2.73933	1.26053	WWC3	7.07157
chr1	79006222	79007399	1178	*	87	0	0	7.38e-48	0	3.68405	1.82527	ADGRL4	7.07157
chr7	32762015	32763192	1178	*	59	0	0	6.4e-26	0	3.05783	1.85196	LINC00997	7.07157
chr6	73298964	73300142	1179	*	107	0	0	5.08e-48	0	3.7998	2.12044	AC019205.1, KHDC1	7.07242
chr19	13840132	13841310	1179	*	66	0	0	4.56e-63	0	4.63921	2.14626	AC020916.1	7.07242
chr21	39655818	39656997	1180	*	52	0	0	1.23e-78	0	6.1775	1.31473	B3GALT5, AF064860.1	7.07327
chr17	83023657	83024838	1182	*	92	0	0	1.34e-30	0	-3.07926	-1.41341	B3GNTL1	7.07496
chr20	60054881	60056063	1183	*	62	0	0	2.7e-29	0	-3.45447	-2.2808	C20orf197	7.07581
chr15	92579615	92580797	1183	*	50	0	0	8.55e-37	0	2.30108	1.06191	AC091544.2	7.07581
chr16	1047968	1049150	1183	*	86	0	0	1.72e-59	0	4.14312	1.1956	intergenic	7.07581
chr9	121325489	121326671	1183	*	59	0	0	9.43e-49	0	4.04723	1.93204	GSN	7.07581
chr20	61719599	61720782	1184	*	57	0	0	1.21e-48	0	-3.53289	-1.79984	CDH4, AL162457.1	7.07665
chr17	82558341	82559525	1185	*	58	0	0	6.29e-42	0	-3.06092	-1.33635	FOXK2	7.0775
chr6	166870346	166871530	1185	*	52	0	0	3.28e-64	0	6.46423	3.1202	RPS6KA2, AL159163.1	7.0775
chr17	81209545	81210730	1186	*	70	0	0	3.47e-31	0	-2.72269	-1.35833	CEP131	7.07834
chr8	144423622	144424807	1186	*	84	0	0	1.12e-73	0	8.34131	2.74724	VPS28	7.07834
chr12	50841921	50843106	1186	*	59	0	0	1.61e-70	0	7.48686	3.44761	TMPRSS12	7.07834
chr4	1081739	1082925	1187	*	52	0	0	1.12e-81	0	-6.82131	-3.2755	RNF212	7.07918
chr21	41247079	41248266	1188	*	60	0	0	1.76e-43	0	-3.38013	-1.6396	BACE2	7.08003
chr9	5085686	5086873	1188	*	74	0	0	5.07e-19	0	2.15696	1.09093	JAK2, PDSS1P1	7.08003
chr12	6883748	6884935	1188	*	73	0	0	1.88e-61	0	4.3672	1.72276	RPL13P5, LRRC23, DSTNP2, SPSB2	7.08003
chr19	57814715	57815903	1189	*	60	0	1.01e-237	2.83e-74	0	6.72789	1.04237	ZNF586, ZNF552	7.08087
chr9	121566047	121567235	1189	*	60	0	0	1.26e-33	0	2.19782	1.04246	DAB2IP	7.08087
chr2	240519406	240520594	1189	*	129	0	0	2.94e-48	0	3.41682	1.10725	ANKMY1	7.08087
chr14	55240828	55242016	1189	*	58	0	0	1.03e-59	0	4.21318	2.65092	COX5AP1	7.08087
chr14	96263258	96264447	1190	*	54	0	0	3.15e-44	0	-2.91123	-1.39391	AL355102.2, BDKRB1, AL355102.4	7.08171
chr5	6348698	6349888	1191	*	71	0	0	1.23e-34	0	-3.10945	-1.24779	intergenic	7.08255
chr17	38578228	38579418	1191	*	88	0	0	6.47e-54	0	4.4429	1.17105	SRCIN1	7.08255
chr8	27992610	27993800	1191	*	56	0	0	3.9e-49	0	5.6205	1.2947	SCARA5	7.08255
chr15	78926651	78927842	1192	*	56	0	0	1.52e-81	0	-6.5644	-1.65861	CTSH	7.08339
chr10	117734455	117735648	1194	*	119	0	0	2.1e-29	0	2.52399	1.05585	LINC02674	7.08506
chr19	34832431	34833624	1194	*	85	0	0	6.62e-32	0	2.523	1.45706	LINC01801	7.08506
chr21	36993745	36994939	1195	*	58	0	0	7.42e-70	0	3.95876	1.74968	MRPL20P1	7.0859
chr6	11232451	11233646	1196	*	72	0	0	4.31e-57	0	5.13834	1.17222	AL139807.1, NEDD9	7.08674
chr22	29470291	29471486	1196	*	73	0	0	1.88e-30	0	3.10357	1.85141	RFPL1S	7.08674
chrX	68840054	68841250	1197	*	52	0	0	2.43e-30	0	-2.81629	-1.24857	EFNB1	7.08757
chr1	51989385	51990581	1197	*	60	0	0	8.48e-53	0	3.35032	1.01097	RAB3B	7.08757
chr8	141367200	141368399	1200	*	64	0	0	5.11e-65	0	3.72664	1.01045	GPR20	7.09008
chr4	188282236	188283435	1200	*	130	0	0	2.09e-55	0	3.80083	1.16923	intergenic	7.09008
chr5	67165961	67167160	1200	*	61	0	0	4.74e-53	0	4.94959	1.89696	MAST4	7.09008
chr7	150857024	150858224	1201	*	101	0	0	2.82e-66	0	4.30572	1.01763	AOC1	7.09091
chr2	239061953	239063155	1203	*	56	0	0	6.06e-66	0	-4.10323	-1.64939	HDAC4	7.09257
chr9	123338933	123340135	1203	*	76	0	0	3.55e-22	0	-2.81045	-1.28587	intergenic	7.09257
chr19	12116719	12117921	1203	*	54	0	0	1.87e-46	0	3.6741	2.3196	ZNF788P, ZNF20	7.09257
chr2	240499791	240500993	1203	*	96	0	0	1.7e-82	0	8.12624	2.94769	ANKMY1	7.09257
chr22	36065301	36066504	1204	*	124	0	0	1.59e-64	0	4.68247	1.00174	intergenic	7.0934
chr13	114015216	114016419	1204	*	67	0	1.68e-307	3.39e-29	0	3.00187	1.08761	RASA3	7.0934
chr2	43675724	43676927	1204	*	80	0	0	4.83e-38	0	2.73761	1.11134	PLEKHH2, C1GALT1C1L	7.0934
chr12	132505958	132507162	1205	*	78	0	0	5.74e-84	0	-6.55301	-3.83865	FBRSL1	7.09423
chr3	72928122	72929329	1208	*	58	0	0	1.67e-52	0	2.92678	1.85049	GXYLT2, FTH1P23	7.09672
chr5	179517388	179518596	1209	*	50	0	0	1.45e-25	0	1.92706	1.05638	intergenic	7.09755
chr6	166005268	166006476	1209	*	70	0	0	4.36e-38	0	3.07948	1.09476	intergenic	7.09755
chr3	11609991	11611199	1209	*	56	0	0	1.28e-31	0	4.30968	2.54569	AC022001.2, VGLL4	7.09755
chr15	98956282	98957491	1210	*	76	0	0	6.52e-38	0	-3.46329	-1.17809	IGF1R, AC036108.1	7.09838
chr10	124626089	124627298	1210	*	54	0	0	2.62e-38	0	-2.87913	-1.12265	AC068896.1, FAM53B	7.09838
chr10	92419953	92421162	1210	*	142	0	0	1.98e-55	0	5.94168	1.15668	MARK2P9	7.09838
chr12	48197823	48199035	1213	*	137	0	0	7.31e-48	0	4.37657	1.1382	AC024257.3	7.10085
chr16	73482537	73483749	1213	*	52	0	0	7.37e-29	0	2.6377	1.55312	LINC01568, ZFHX3	7.10085
chr9	136677179	136678392	1214	*	95	0	0	2.67e-26	0	-3.40868	-1.06524	AGPAT2	7.10168
chr1	103108403	103109616	1214	*	53	0	0	8.12e-58	0	2.94893	1.08309	COL11A1	7.10168
chr4	39446296	39447510	1215	*	180	0	0	1.42e-51	0	5.49908	1.47026	KLB	7.1025
chr11	855892	857107	1216	*	50	0	0	4.21e-47	0	-3.34979	-1.37247	TSPAN4, AP006623.1	7.10332
chr4	184000324	184001540	1217	*	74	0	0	2.79e-50	0	-4.54394	-2.15171	STOX2	7.10414
chr20	57224690	57225906	1217	*	51	0	0	2.82e-39	0	-3.06642	-1.80011	BMP7	7.10414
chr1	112465315	112466531	1217	*	83	0	0	9.1e-32	0	3.991	1.11723	intergenic	7.10414
chr21	43903409	43904625	1217	*	57	0	0	4.07e-32	0	2.49855	1.14746	AGPAT3	7.10414
chr12	2229232	2230448	1217	*	104	0	0	4.81e-36	0	2.44385	1.28576	CACNA1C	7.10414
chr15	42155641	42156857	1217	*	53	0	0	2.09e-46	0	4.04244	2.25249	PLA2G4F	7.10414
chr7	44962165	44963381	1217	*	174	0	0	5.36e-57	0	5.10651	3.62714	MYO1G	7.10414
chr17	78801607	78802824	1218	*	63	0	0	4.58e-46	0	-4.89933	-1.27313	USP36	7.10497
chr7	70789800	70791017	1218	*	192	0	0	3.86e-47	0	-4.83302	-1.0508	AUTS2	7.10497
chr8	66541581	66542798	1218	*	120	0	0	2.85e-34	0	2.52873	1.21265	intergenic	7.10497
chr22	46026829	46028046	1218	*	129	0	0	1.52e-76	0	6.4628	2.22584	intergenic	7.10497
chr1	31181493	31182711	1219	*	106	0	0	3.9e-15	0	1.77555	1.12464	NKAIN1	7.10579
chr7	156177493	156178712	1220	*	60	0	0	5.04e-49	0	-5.73654	-2.15228	intergenic	7.10661
chr2	240868121	240869340	1220	*	57	0	0	1.38e-69	0	4.511	1.40869	AGXT	7.10661
chr6	156396271	156397490	1220	*	86	0	0	1.63e-55	0	4.16747	2.8944	AL589693.1	7.10661
chr5	36692133	36693353	1221	*	67	0	0	1.17e-72	0	3.67028	1.15028	AC008957.1	7.10743
chr22	46439087	46440308	1222	*	66	0	0	4.28e-34	0	-3.36672	-1.22117	CELSR1	7.10824
chr20	4720801	4722022	1222	*	68	0	0	2.36e-64	0	5.97867	1.83265	PRND	7.10824
chr16	4376225	4377446	1222	*	57	0	0	2.01e-34	0	4.50586	3.37441	VASN, CORO7-PAM16, CORO7	7.10824
chr10	133226371	133227593	1223	*	85	0	0	8.09e-59	0	-5.33854	-1.57988	KNDC1	7.10906
chr1	10644772	10645995	1224	*	56	0	0	9.74e-40	0	-3.47524	-1.07324	AL139423.1, CASZ1	7.10988
chr3	58639990	58641214	1225	*	55	0	0	4.74e-48	0	4.68513	1.18207	FAM3D-AS1, FAM3D	7.1107
chr19	48329247	48330472	1226	*	79	0	0	7.49e-73	0	6.93306	1.07931	EMP3	7.11151
chr17	74446039	74447265	1227	*	60	0	0	2.92e-73	0	-6.13008	-2.9478	GPRC5C	7.11233
chr19	1112202	1113429	1228	*	168	0	0	1.32e-57	0	4.14518	2.07125	SBNO2	7.11314
chr11	119664052	119665280	1229	*	78	0	0	3.46e-47	0	-4.58762	-2.31016	NECTIN1	7.11396
chr14	72679287	72680515	1229	*	53	0	0	3.55e-30	0	3.91045	1.82022	DPF3	7.11396
chr6	33975671	33976899	1229	*	75	0	0	1.61e-36	0	3.17722	1.88457	intergenic	7.11396
chr11	861978	863206	1229	*	89	0	0	8.56e-32	0	4.05148	2.06428	TSPAN4	7.11396
chr21	45429969	45431198	1230	*	84	0	0	1.24e-76	0	6.40153	4.53632	COL18A1	7.11477
chr3	183555380	183556610	1231	*	63	0	0	8.97e-31	0	-3.48703	-2.13892	KLHL6	7.11558
chr17	79921738	79922968	1231	*	79	0	0	1.77e-49	0	-3.78075	-1.22649	LINC01978, LINC01979	7.11558
chr9	85898173	85899403	1231	*	57	0	0	9.22e-81	0	5.89676	1.44289	PHBP7	7.11558
chr17	81092656	81093886	1231	*	52	0	0	2.68e-72	0	6.30666	4.05958	BAIAP2	7.11558
chr6	163750356	163751587	1232	*	80	0	0	1.89e-87	0	-8.10005	-4.74038	AL078602.1	7.11639
chr16	598824	600056	1233	*	88	0	0	7.77e-34	0	-2.96603	-1.08924	RAB40C	7.11721
chr9	106928450	106929682	1233	*	85	0	0	2.52e-74	0	7.47934	1.00703	ZNF462	7.11721
chr13	113129155	113130387	1233	*	160	0	0	1.38e-62	0	6.06938	1.41	F10	7.11721
chrX	39821034	39822267	1234	*	54	0	0	1.3e-51	0	4.81583	2.596	intergenic	7.11802
chr11	3224854	3226088	1235	*	71	0	0	8.2e-78	0	7.56218	3.70886	AC109309.1, MRGPRE	7.11883
chr20	33674139	33675375	1237	*	140	0	0	2.57e-42	0	4.53633	1.03678	AL121906.1, NECAB3	7.12044
chr19	6669837	6671074	1238	*	54	0	0	5.46e-31	0	-3.02541	-1.69489	TNFSF14	7.12125
chr17	83099780	83101017	1238	*	67	0	0	8.54e-43	0	3.88482	1.55941	intergenic	7.12125
chr19	3162586	3163824	1239	*	98	0	0	1.41e-28	0	3.33268	1.21	GNA15	7.12206
chr7	150851233	150852472	1240	*	54	0	0	3.37e-25	0	-3.32077	-1.07957	AOC1	7.12287
chr19	35767238	35768478	1241	*	79	0	0	5.22e-29	0	2.54223	1.16147	PROSER3	7.12367
chr8	134477768	134479008	1241	*	70	0	0	6.28e-66	0	4.19594	2.43819	ZFAT	7.12367
chr13	61413355	61414597	1243	*	57	0	0	4.08e-26	0	2.57538	1.13049	PCDH20, AL592490.1	7.12528
chr1	904743	905985	1243	*	106	0	0	2.16e-72	0	5.25598	1.14875	AL645608.6	7.12528
chr19	52734719	52735961	1243	*	71	0	0	1.63e-75	0	7.92464	1.52802	ZNF611	7.12528
chr14	104977730	104978973	1244	*	171	0	0	1.17e-58	0	4.36542	1.11413	AHNAK2	7.12609
chr6	166465160	166466403	1244	*	51	0	0	1.01e-73	0	8.34384	3.28837	RPS6KA2, RPS6KA2-IT1	7.12609
chr12	94139405	94140649	1245	*	68	0	0	3.49e-37	0	2.14017	1.27842	AC123567.1	7.12689
chr1	228207198	228208442	1245	*	59	0	0	2.75e-56	0	4.40495	1.43604	OBSCN, OBSCN-AS1	7.12689
chr3	196142172	196143416	1245	*	71	0	0	2.03e-48	0	4.92773	3.49887	LINC00885	7.12689
chr15	93109289	93110534	1246	*	102	0	0	6.67e-48	0	3.97017	1.91613	intergenic	7.12769
chr1	109296084	109297330	1247	*	50	0	0	3.06e-51	0	-5.25912	-2.14148	MYBPHL	7.1285
chr16	85309108	85310356	1249	*	56	0	0	2.51e-55	0	-4.4023	-3.30454	GSE1, AC092275.1	7.1301
chr12	132268734	132269982	1249	*	156	0	0	4.07e-41	0	-4.6726	-1.00281	GALNT9	7.1301
chr2	240985991	240987240	1250	*	50	0	0	1.49e-75	0	-7.52257	-1.57194	CROCC2, AC104809.1	7.1309
chr6	158869015	158870264	1250	*	126	0	0	4.3e-39	0	4.47309	1.03145	C6orf99	7.1309
chr17	18224502	18225751	1250	*	99	0	0	9.85e-60	0	5.09522	1.65994	LLGL1	7.1309
chr1	43348403	43349652	1250	*	140	0	0	1.3e-35	0	4.77069	3.73602	MPL, AL139289.2	7.1309
chr5	139299	140550	1252	*	93	0	0	3.82e-64	0	4.38788	2.06085	PLEKHG4B	7.1325
chr1	9315503	9316755	1253	*	73	0	0	6.54e-59	0	-4.60271	-1.12216	SPSB1	7.1333
chr6	31144538	31145792	1255	*	56	0	0	8.34e-51	0	-5.06223	-1.48378	CCHCR1	7.13489
chr17	81842832	81844086	1255	*	78	0	0	4.51e-30	0	-3.15812	-1.26583	AC145207.3, P4HB	7.13489
chr8	139806005	139807259	1255	*	59	0	0	1.56e-32	0	-3.12183	-1.20052	TRAPPC9	7.13489
chr21	42275392	42276647	1256	*	58	0	0	1.66e-55	0	5.06593	1.46116	ABCG1	7.13569
chr14	102683262	102684518	1257	*	110	0	0	7.92e-58	0	5.35614	2.09512	RCOR1	7.13648
chr6	42726678	42727935	1258	*	133	0	0	1.83e-24	0	2.73834	1.17543	ATP6V0CP3	7.13728
chr1	22129530	22130788	1259	*	78	0	0	4.99e-51	0	-3.57988	-1.23478	WNT4	7.13807
chr14	99936080	99937338	1259	*	67	0	0	3.82e-69	0	6.62258	2.55054	EML1	7.13807
chr1	245335386	245336644	1259	*	52	0	0	2.08e-78	0	7.28398	2.92842	KIF26B	7.13807
chr19	1907251	1908509	1259	*	122	0	0	4.17e-75	0	7.82513	4.19696	SCAMP4, ADAT3	7.13807
chr5	2111247	2112506	1260	*	116	0	0	9.48e-46	0	-4.30583	-2.55882	AC124852.1	7.13887
chr3	13041250	13042509	1260	*	102	0	0	9.2e-69	0	-4.34382	-1.42304	IQSEC1	7.13887
chr6	106097690	106098949	1260	*	52	0	0	8.42e-54	0	-4.46953	-1.03023	PRDM1, ATG5	7.13887
chr7	128853907	128855167	1261	*	102	0	0	6.16e-45	0	-3.13994	-1.14293	FLNC, FLNC-AS1	7.13966
chr6	136822158	136823419	1262	*	132	0	0	8.11e-47	0	3.03945	1.01127	PEX7	7.14045
chr5	179678149	179679410	1262	*	233	0	0	2.5e-53	0	3.97252	1.09883	CANX, HMGB3P22, CBY3	7.14045
chr8	27286567	27287829	1263	*	61	0	0	8.09e-55	0	-4.68768	-1.17413	TRIM35	7.14125
chr12	124543248	124544511	1264	*	77	0	0	6.02e-46	0	3.00049	1.06	NCOR2	7.14204
chr3	113441067	113442330	1264	*	106	0	0	2.36e-46	0	4.24424	1.70983	CFAP44, AC112128.1	7.14204
chr1	175044015	175045278	1264	*	54	0	0	6.58e-65	0	5.7902	2.09036	ENTR1P2	7.14204
chr15	74842719	74843983	1265	*	187	0	0	4.56e-67	0	6.62487	1.09264	ULK3, SCAMP2	7.14283
chr2	7324763	7326027	1265	*	65	0	0	1.88e-63	0	4.01629	2.01861	AC010904.1	7.14283
chr7	6153782	6155046	1265	*	261	0	0	2.72e-58	0	4.52596	3.12046	USP42	7.14283
chr8	640486	641751	1266	*	57	0	0	6.66e-48	0	-4.47099	-1.45724	ERICH1	7.14362
chr3	13053218	13054483	1266	*	54	0	0	3.75e-69	0	4.21406	1.15245	IQSEC1	7.14362
chr5	35990889	35992154	1266	*	66	0	0	3.44e-39	0	3.22165	1.28123	UGT3A1	7.14362
chr4	39480361	39481627	1267	*	89	0	0	4.13e-54	0	4.58026	1.34511	LIAS, AC021148.1	7.14441
chr13	113059579	113060845	1267	*	102	0	0	8.54e-47	0	3.95547	1.4595	MCF2L	7.14441
chr11	68020603	68021870	1268	*	90	0	0	6.79e-39	0	3.71187	1.05866	ALDH3B1	7.1452
chr2	20106721	20107989	1269	*	52	0	0	5.51e-39	0	2.59337	1.6692	AC098828.1	7.14598
chr18	26132852	26134120	1269	*	76	0	0	1.38e-46	0	2.66613	1.84219	PSMA8	7.14598
chr16	89340890	89342159	1270	*	71	0	0	1.45e-44	0	-3.98078	-1.1131	ANKRD11	7.14677
chr1	44616995	44618264	1270	*	96	0	0	1.36e-49	0	4.32838	3.76047	RNF220	7.14677
chr17	80104781	80106051	1271	*	105	0	0	2.05e-53	0	-5.44589	-2.04377	GAA	7.14756
chr4	7129333	7130603	1271	*	60	0	0	6.2e-44	0	2.82391	1.00192	intergenic	7.14756
chr19	45238586	45239856	1271	*	56	0	0	8.91e-24	0	1.87446	1.10987	MARK4, EXOC3L2	7.14756
chr19	43501051	43502321	1271	*	90	0	0	1.21e-30	0	4.37643	1.53011	PHLDB3	7.14756
chr9	89418247	89419518	1272	*	51	0	0	4.36e-62	0	5.4497	-1.64804	SEMA4D	7.14835
chr3	12876001	12877272	1272	*	84	0	0	1.13e-56	0	4.10591	1.17773	intergenic	7.14835
chr8	10697811	10699083	1273	*	54	0	0	1.19e-43	0	2.67146	1.59407	C8orf74, RP1L1	7.14913
chr2	231483210	231484482	1273	*	129	0	0	1.12e-41	0	3.82619	2.745	NCL	7.14913
chr1	116986124	116987398	1275	*	72	0	0	2.27e-47	0	-3.6737	-1.42939	PTGFRN	7.1507
chr14	67411394	67412668	1275	*	150	0	0	9.84e-58	0	4.6086	1.10293	PLEK2	7.1507
chr19	48392807	48394081	1275	*	59	0	0	6.03e-65	0	4.58347	1.29634	intergenic	7.1507
chr2	174012628	174013902	1275	*	94	0	0	3.17e-76	0	7.52445	2.29313	AC016737.2	7.1507
chr19	12656935	12658210	1276	*	114	0	0	2.6e-31	0	3.63727	1.74129	MAN2B1	7.15149
chr19	6534689	6535964	1276	*	61	0	0	3.17e-54	0	3.63103	1.76468	TNFSF9	7.15149
chr7	95323868	95325143	1276	*	66	0	0	4.41e-61	0	3.81115	1.81107	PON1	7.15149
chr6	167208669	167209944	1276	*	74	0	0	1.52e-67	0	6.52373	3.3958	AL353747.1	7.15149
chr14	100708767	100710042	1276	*	142	0	0	7.31e-60	0	7.29011	3.53109	intergenic	7.15149
chr20	23086306	23087582	1277	*	62	0	0	2.01e-37	0	-3.31411	-1.92753	CD93	7.15227
chr19	3594721	3595997	1277	*	60	0	0	8.92e-19	0	1.59817	1.03721	TBXA2R	7.15227
chr16	87406806	87408083	1278	*	60	0	0	4.38e-52	0	-3.86713	-1.82509	ZCCHC14	7.15305
chr16	85515101	85516378	1278	*	51	0	0	8.47e-59	0	4.63352	3.64836	GSE1	7.15305
chr5	1555626	1556904	1279	*	54	0	0	3.02e-54	0	-5.15726	-2.10438	intergenic	7.15383
chr15	72155269	72156547	1279	*	64	0	0	2.19e-29	0	4.10685	1.9477	AC020779.2	7.15383
chr11	67403894	67405173	1280	*	54	0	0	5.4e-38	0	-3.18486	-1.23278	TBC1D10C, PPP1CA	7.15462
chr7	1868611	1869890	1280	*	99	0	0	9.69e-36	0	-3.31739	-1.1935	MAD1L1, AC069288.1	7.15462
chr1	159945497	159946776	1280	*	129	0	0	9.16e-47	0	3.85907	1.00067	IGSF9	7.15462
chr8	11613093	11614372	1280	*	110	0	0	4.92e-50	0	4.0842	1.04389	intergenic	7.15462
chr3	186193418	186194697	1280	*	174	0	0	5.4e-54	0	5.12902	2.212	DGKG	7.15462
chr12	63821720	63823000	1281	*	99	0	0	5.55e-39	0	3.08489	1.80404	PABPC1P4, RXYLT1-AS1	7.1554
chr1	2152806	2154087	1282	*	62	0	0	5.88e-46	0	-3.59334	-1.43319	PRKCZ	7.15618
chr5	1652913	1654195	1283	*	60	0	0	7.28e-80	0	-5.81823	-1.18233	intergenic	7.15696
chr2	43039486	43040769	1284	*	53	0	0	3.95e-75	0	5.31672	3.74042	LINC01819	7.15774
chr12	19130710	19131994	1285	*	51	0	5e-220	2.06e-29	5.73e-303	3.2612	1.00851	PLEKHA5	7.15851
chr18	54827605	54828889	1285	*	76	0	0	4.55e-67	0	4.98146	1.5405	RAB27B	7.15851
chr19	40622974	40624258	1285	*	75	0	0	3.36e-58	0	4.66154	3.3727	LTBP4	7.15851
chr1	37555832	37557117	1286	*	63	0	0	5.68e-30	0	4.01482	1.75281	AL034379.1, DNALI1	7.15929
chr9	135613058	135614343	1286	*	71	0	0	3.87e-62	0	3.62745	1.93129	AL354761.1	7.15929
chr14	104195950	104197236	1287	*	53	0	0	1.9e-75	0	-6.95826	-3.08418	intergenic	7.16007
chr1	155033580	155034866	1287	*	54	0	0	1.21e-44	0	-3.71385	-1.28563	DCST1, DCST2	7.16007
chr20	62979861	62981148	1288	*	77	0	0	7.11e-64	0	-5.08119	-2.57062	intergenic	7.16085
chr9	98172909	98174196	1288	*	56	0	0	1.34e-37	0	-2.81344	-1.23534	CORO2A	7.16085
chr8	143021153	143022440	1288	*	76	0	0	2.38e-80	0	7.6749	2.86622	LY6E	7.16085
chr17	80064522	80065810	1289	*	61	0	0	8.69e-35	0	-3.58851	-1.52467	CCDC40	7.16162
chr13	46437575	46438863	1289	*	91	0	0	1.4e-19	0	1.54669	1.00304	RUBCNL, PPP1R2P4	7.16162
chr11	1830109	1831397	1289	*	77	0	0	7.31e-71	0	4.55067	3.36367	SYT8	7.16162
chr11	63817601	63818890	1290	*	101	0	0	7.4e-56	0	-2.68682	-1.0086	SPINDOC	7.1624
chr4	168630601	168631890	1290	*	100	0	0	6.79e-65	0	5.54854	1.0292	PALLD	7.1624
chr12	113112026	113113315	1290	*	55	0	0	4.12e-62	0	3.60003	1.54564	RASAL1	7.1624
chr7	102320511	102321800	1290	*	60	0	0	2.67e-52	0	3.26408	1.76331	SH2B2	7.1624
chr10	86942329	86943618	1290	*	232	0	0	3.34e-61	0	5.46843	2.10071	MMRN2	7.1624
chr13	20434990	20436279	1290	*	151	0	0	2.79e-52	0	5.4544	3.35794	CRYL1	7.1624
chr6	157644578	157645868	1291	*	53	0	0	1.54e-26	0	-3.45877	-1.36534	ZDHHC14	7.16317
chr10	101310330	101311621	1292	*	59	0	0	9.84e-39	0	2.98534	1.6775	AL133387.1	7.16395
chr17	81309039	81310330	1292	*	93	0	0	1.67e-39	0	4.01326	2.60043	LINC00482	7.16395
chr9	137673537	137674829	1293	*	65	0	0	4.76e-53	0	4.20362	2.31677	AL590627.2, EHMT1	7.16472
chr17	75635332	75636624	1293	*	62	0	0	2.25e-59	0	5.55127	2.45096	SMIM5, RECQL5	7.16472
chr6	474229	475522	1294	*	80	0	0	6.99e-83	0	-5.34516	-1.30551	AL512308.1	7.16549
chr20	62683275	62684568	1294	*	116	0	0	4.78e-19	0	-3.01503	-1.04452	SLCO4A1	7.16549
chr5	178781476	178782769	1294	*	60	0	0	3.85e-72	0	6.63703	1.24428	AACSP1	7.16549
chr1	247530733	247532026	1294	*	144	0	0	3.21e-37	0	3.00397	1.58454	GCSAML, OR2C3, GCSAML-AS1	7.16549
chr1	18717050	18718343	1294	*	75	0	0	1.12e-60	0	5.3921	3.74451	PAX7	7.16549
chr6	28160594	28161888	1295	*	62	0	0	6.84e-35	0	-3.89062	1.03648	ZNF192P1	7.16627
chr13	112818805	112820099	1295	*	90	0	0	7.08e-68	0	5.94887	1.37133	ATP11A	7.16627
chr6	169162311	169163605	1295	*	80	0	0	1.39e-71	0	6.88293	2.77909	LINC01615	7.16627
chr4	1331073	1332367	1295	*	91	0	0	2.3e-59	0	5.67524	2.8827	MAEA	7.16627
chr14	23346525	23347820	1296	*	57	0	0	1.01e-35	0	3.19926	1.73437	SLC22A17	7.16704
chr5	172748317	172749612	1296	*	94	0	0	7.08e-66	0	5.99713	4.27306	intergenic	7.16704
chr8	143355055	143356352	1298	*	64	0	0	1.56e-73	0	-5.80466	-2.90293	TOP1MT	7.16858
chr1	179817830	179819127	1298	*	66	0	0	4.67e-76	0	7.20318	1.53249	AL359853.1	7.16858
chr19	15457160	15458457	1298	*	219	0	0	1.77e-30	0	4.37427	3.60831	RASAL3	7.16858
chr8	750149	751447	1299	*	82	0	0	1.48e-69	0	5.68617	1.20038	DLGAP2	7.16935
chr22	46738063	46739361	1299	*	62	0	0	9.84e-46	0	4.57561	1.71144	CERK	7.16935
chr3	11036982	11038281	1300	*	106	0	0	5.85e-72	0	-4.93836	-2.07322	SLC6A1	7.17012
chr14	24315428	24316727	1300	*	181	0	0	5.55e-63	0	4.99107	3.26204	LTB4R	7.17012
chr19	54460255	54461557	1303	*	89	0	0	5.72e-43	0	-4.31227	-1.91954	LENG8	7.17242
chr16	88183573	88184875	1303	*	87	0	0	2.99e-33	0	-3.12072	-1.49498	AC134312.5	7.17242
chr8	143933998	143935300	1303	*	107	0	0	2.9e-59	0	5.95825	2.57153	PLEC	7.17242
chr17	63848423	63849726	1304	*	167	0	0	1.45e-45	0	3.1332	1.15121	TCAM1P	7.17319
chr9	130128652	130129955	1304	*	69	0	0	1.93e-66	0	6.91872	2.58892	GPR107	7.17319
chr5	88666998	88668301	1304	*	69	0	0	2.87e-47	0	4.19387	2.92089	LINC00461	7.17319
chr14	97977813	97979117	1305	*	53	0	0	4.1e-44	0	-5.14919	-2.10574	LINC01550	7.17396
chr20	62351708	62353012	1305	*	160	0	0	9.54e-48	0	-4.70837	-1.62192	LAMA5-AS1, LAMA5	7.17396
chr1	234724358	234725662	1305	*	60	0	0	6.24e-36	0	3.18874	1.06624	LINC01132	7.17396
chr2	88549008	88550312	1305	*	53	0	0	9.2e-46	0	3.55473	1.4855	AC104134.1	7.17396
chr9	114387955	114389259	1305	*	60	0	0	3.14e-65	0	6.89472	1.74085	AKNA	7.17396
chr11	78961549	78962854	1306	*	77	0	0	2.31e-45	0	3.89734	1.74019	TENM4	7.17472
chr7	130140577	130141882	1306	*	169	0	0	4.69e-50	0	4.57846	2.15513	AC087071.1	7.17472
chr1	119896301	119897607	1307	*	69	0	0	1.78e-69	0	5.04174	2.03283	ADAM30	7.17549
chr8	22191109	22192416	1308	*	58	0	0	2.54e-79	0	8.43	2.419	BMP1, AC105206.3	7.17625
chr12	102965470	102966778	1309	*	73	0	0	4.34e-41	0	3.42585	1.09262	intergenic	7.17702
chr8	141305430	141306738	1309	*	55	0	1.2e-299	3.4e-28	0	3.1918	1.16999	SLC45A4	7.17702
chr14	102049507	102050816	1310	*	60	0	0	1.1e-46	0	-4.31692	-2.2461	DYNC1H1, AL118558.1	7.17778
chr11	60614578	60615888	1311	*	71	0	0	1.52e-57	0	4.35115	1.02748	LINC00301	7.17855
chr18	22199980	22201290	1311	*	64	0	0	5.58e-43	0	2.28951	1.17296	GATA6, AC091588.3	7.17855
chr21	44289447	44290757	1311	*	73	0	0	1e-51	0	4.96047	1.41543	AIRE	7.17855
chr17	6434860	6436170	1311	*	57	0	0	2.06e-40	0	3.89561	1.65939	AIPL1	7.17855
chr19	38831067	38832378	1312	*	123	0	0	1.55e-71	0	6.20986	1.01281	ECH1, AC008982.1	7.17931
chr16	86194993	86196304	1312	*	50	0	0	7.88e-62	0	5.56668	2.26217	LINC01082, AC135012.3	7.17931
chr2	202773541	202774852	1312	*	85	0	0	1.23e-59	0	4.366	2.92518	ICA1L, AC098831.1	7.17931
chr8	30027255	30028567	1313	*	109	0	0	1.82e-25	0	2.28884	1.11987	MAP2K1P1	7.18007
chr22	48691901	48693213	1313	*	68	0	0	6.77e-76	0	5.40516	2.68819	TAFA5	7.18007
chr20	45308022	45309335	1314	*	53	0	0	6.15e-25	0	3.50071	1.31242	RBPJL, MATN4	7.18083
chr16	86087242	86088555	1314	*	62	0	0	5.71e-49	0	4.6044	1.46161	AC135012.1	7.18083
chr1	243930501	243931814	1314	*	56	0	0	6.57e-33	0	3.9855	2.88004	LINC02774	7.18083
chr19	1307399	1308713	1315	*	106	0	0	3.04e-43	0	3.28015	1.00029	RPS15P9	7.18159
chr22	24685653	24686967	1315	*	98	0	0	1.1e-45	0	3.63291	1.65498	ARL5AP4, AP000357.1	7.18159
chr16	49854188	49855502	1315	*	157	0	0	1.06e-58	0	6.08945	1.94718	ZNF423	7.18159
chr17	78491474	78492789	1316	*	54	0	0	2.13e-59	0	3.64858	1.46531	DNAH17-AS1, DNAH17	7.18235
chr8	143185889	143187205	1317	*	124	0	0	1.48e-31	0	3.96535	2.88096	intergenic	7.18311
chr14	104151221	104152538	1318	*	69	0	0	7.27e-68	0	4.99953	1.50915	KIF26A	7.18387
chr5	132760601	132761918	1318	*	72	0	0	4.09e-70	0	6.81417	1.66469	SEPTIN8	7.18387
chr5	23506324	23507643	1320	*	90	0	0	9.63e-27	0	1.68929	1.05424	PRDM9	7.18539
chr13	114105894	114107214	1321	*	56	0	0	1.63e-78	0	7.12688	1.9553	RASA3	7.18614
chr6	105985568	105986888	1321	*	113	0	0	7.96e-44	0	4.6199	3.03854	intergenic	7.18614
chr16	88090530	88091851	1322	*	72	0	0	5.85e-70	0	6.22805	3.94961	AC134312.1	7.1869
chr12	132218701	132220024	1324	*	62	0	0	1.29e-32	0	-2.63525	-1.34239	GALNT9	7.18841
chr7	70787224	70788548	1325	*	73	0	0	3.25e-78	0	7.62099	3.84067	AUTS2	7.18917
chr15	101188029	101189354	1326	*	80	0	0	2.91e-70	0	-5.02375	-3.50195	CHSY1	7.18992
chr16	3577159	3578484	1326	*	54	0	0	5.94e-24	0	-3.1252	-1.99832	NLRC3	7.18992
chr22	49783538	49784863	1326	*	136	0	0	1.32e-53	0	-4.89563	-1.02852	BRD1	7.18992
chr5	178462895	178464220	1326	*	60	0	0	5.27e-75	0	5.00573	1.26488	COL23A1	7.18992
chr1	47532964	47534289	1326	*	64	0	0	3.43e-57	0	4.17495	1.34266	intergenic	7.18992
chr16	84818955	84820280	1326	*	133	0	0	1.34e-61	0	5.62472	2.02242	CRISPLD2, AC025280.3	7.18992
chr6	170048975	170050301	1327	*	51	0	0	1.61e-63	0	-4.64166	-1.83424	intergenic	7.19068
chr8	20248968	20250294	1327	*	56	0	0	4.49e-47	0	2.89233	1.04772	LZTS1	7.19068
chr7	226405	227731	1327	*	51	0	0	3.44e-69	0	6.8056	3.02205	FAM20C, AC145676.1	7.19068
chr12	132178777	132180104	1328	*	88	0	0	2e-49	0	-4.80763	-2.86938	intergenic	7.19143
chr11	57311410	57312737	1328	*	58	0	0	3.79e-52	0	4.01109	1.09862	TNKS1BP1	7.19143
chr7	999303	1000630	1328	*	79	0	0	1.66e-65	0	5.88406	2.99292	C7orf50	7.19143
chr12	122702351	122703679	1329	*	70	0	0	3.74e-78	0	-7.74968	-1.25845	AC026333.3, HCAR2	7.19218
chr2	199602991	199604319	1329	*	89	0	0	9.15e-52	0	5.45208	3.40165	intergenic	7.19218
chr19	2015243	2016572	1330	*	50	0	0	3.91e-75	0	7.77066	2.97744	BTBD2	7.19293
chr11	70826260	70827590	1331	*	95	0	0	2.13e-70	0	-6.11232	-3.31414	SHANK2	7.19369
chr10	21534508	21535838	1331	*	109	0	0	1.05e-56	0	3.80817	1.01838	MLLT10	7.19369
chr3	50606702	50608033	1332	*	52	0	0	7.72e-45	0	-3.24608	-1.38525	CISH	7.19444
chr22	44067826	44069158	1333	*	90	0	0	1.11e-24	0	-3.36219	-1.5635	PARVB	7.19519
chr10	101018115	101019447	1333	*	101	0	0	1.24e-60	0	3.55068	1.23894	PDZD7	7.19519
chr17	3557811	3559143	1333	*	93	0	0	3.01e-68	0	6.35421	3.20014	TRPV3	7.19519
chr11	3126354	3127687	1334	*	68	0	0	1.91e-74	0	-7.19003	-2.7319	OSBPL5	7.19594
chr7	98216978	98218311	1334	*	91	0	0	1.57e-94	0	-7.28853	-2.58277	TECPR1	7.19594
chr7	86644210	86645544	1335	*	93	0	0	1.01e-55	0	5.13254	1.39009	GRM3	7.19669
chr9	135247533	135248868	1336	*	54	0	0	2.32e-43	0	-4.48634	-1.58148	AL390778.2	7.19744
chr7	5224944	5226279	1336	*	60	0	0	5.23e-43	0	-3.99544	-1.48654	WIPI2	7.19744
chr19	2986836	2988171	1336	*	50	0	0	1.24e-59	0	4.95989	2.46029	TLE6	7.19744
chr14	104275100	104276436	1337	*	63	0	0	1.41e-43	0	-4.23492	-1.47996	LINC02691	7.19818
chr11	77147576	77148912	1337	*	80	0	0	1.17e-29	0	3.40861	1.04303	MYO7A	7.19818
chr3	122563033	122564369	1337	*	57	0	1.82e-299	3.64e-77	0	7.57744	1.32071	DTX3L, PARP9	7.19818
chr2	129586499	129587835	1337	*	82	0	0	1.39e-25	0	2.24269	1.41744	intergenic	7.19818
chr13	74131927	74133263	1337	*	74	0	0	4.08e-62	0	4.61622	2.10392	intergenic	7.19818
chr7	155213570	155214906	1337	*	60	0	0	6.33e-54	0	4.56431	3.11841	AC099552.5	7.19818
chr9	88076184	88077521	1338	*	138	0	0	1.64e-46	0	4.68843	1.07138	AL353572.4	7.19893
chr17	50686323	50687660	1338	*	54	0	0	1.8e-76	0	6.71882	3.50862	ABCC3	7.19893
chr17	79136907	79138245	1339	*	78	0	0	1.51e-63	0	-4.86468	-3.00183	RBFOX3	7.19968
chr19	35513297	35514635	1339	*	68	0	0	2.4e-41	0	3.53591	1.36781	DMKN	7.19968
chr11	67639490	67640828	1339	*	90	0	0	2.53e-70	0	4.19742	1.60862	TBX10	7.19968
chr3	184491067	184492405	1339	*	100	0	0	1.65e-27	0	3.68152	1.62178	intergenic	7.19968
chr17	1783293	1784632	1340	*	69	0	0	4.23e-65	0	-3.88831	-1.91602	SMYD4	7.20042
chr8	1295741	1297081	1341	*	55	0	0	3.4e-49	0	-5.04996	-1.56691	DLGAP2, AF067845.2	7.20117
chr2	45643048	45644388	1341	*	108	0	0	8.13e-66	0	5.49474	1.04459	intergenic	7.20117
chr11	60970559	60971900	1342	*	60	0	0	4.44e-37	0	-3.90071	-1.74842	CD6	7.20192
chr17	38295880	38297221	1342	*	73	0	0	2.73e-70	0	5.82133	1.52148	MRPL45	7.20192
chr11	2562380	2563721	1342	*	74	0	0	3.27e-49	0	3.43476	1.53497	KCNQ1	7.20192
chr16	72947304	72948645	1342	*	58	0	0	2.28e-54	0	5.2897	2.46525	ZFHX3	7.20192
chr14	23414014	23415356	1343	*	50	0	2.02e-242	1.11e-61	0	5.64409	1.22171	AL132855.1, MYH7	7.20266
chr10	636184	637528	1345	*	60	0	0	2.02e-57	0	-4.93248	-1.35095	DIP2C	7.20415
chr4	74364116	74365460	1345	*	97	0	0	6.96e-71	0	7.48324	1.21875	EREG	7.20415
chr14	105011118	105012462	1345	*	70	0	0	2.22e-68	0	5.79806	1.26003	CDCA4	7.20415
chr16	57759728	57761072	1345	*	58	0	0	2.28e-67	0	6.10261	1.55881	AC092118.2, KIFC3	7.20415
chr6	27863928	27865272	1345	*	62	0	0	4.03e-39	0	3.40643	1.6437	H2BC15, H2BC16P	7.20415
chr11	6496878	6498223	1346	*	77	0	0	1.07e-20	0	2.75235	1.1821	AC084337.2, DNHD1	7.20489
chr8	142469969	142471314	1346	*	50	0	0	8.27e-30	0	2.65344	1.19148	ADGRB1	7.20489
chr1	148353604	148354950	1347	*	110	0	0	4.2e-28	0	2.61574	1.22277	LINC01138	7.20564
chr2	95388651	95389997	1347	*	110	0	0	5.22e-69	0	3.82775	1.40861	intergenic	7.20564
chr19	18308656	18310003	1348	*	66	0	0	1.64e-48	0	-3.52324	-1.50382	LSM4	7.20638
chr19	2212821	2214169	1349	*	92	0	0	2.8e-65	0	5.30093	1.69736	DOT1L, AC004490.1	7.20712
chr9	19032671	19034019	1349	*	58	0	0	5.58e-51	0	3.5045	1.99408	SAXO1	7.20712
chr6	27761522	27762870	1349	*	54	0	0	1.85e-35	0	3.38859	2.23341	AL009179.1	7.20712
chr19	33273377	33274727	1351	*	52	0	0	6.37e-63	0	-5.01276	-2.31164	intergenic	7.2086
chr7	253892	255242	1351	*	66	0	0	1.04e-30	0	-3.06113	-1.81651	FAM20C	7.2086
chr14	105891136	105892486	1351	*	54	0	0	3.59e-17	0	-2.49166	-1.19981	AC246787.2, IGHD1-20, IGHD6-19	7.2086
chr17	81999685	82001036	1352	*	97	0	0	2.39e-33	0	2.5627	1.56413	ASPSCR1	7.20934
chr14	101584127	101585479	1353	*	92	0	0	3.86e-64	0	4.7023	3.30756	intergenic	7.21008
chr10	131726007	131727361	1355	*	56	0	0	1.59e-49	0	-3.70994	-1.8114	intergenic	7.21156
chr1	247448136	247449491	1356	*	57	0	0	7.85e-37	0	3.93249	2.20992	NLRP3, OR2B11	7.21229
chr7	140403744	140405101	1358	*	56	0	0	4.43e-39	0	3.99787	1.11526	RAB19, SLC37A3	7.21377
chr1	27659019	27660377	1359	*	134	0	0	2.74e-68	0	6.96637	1.1952	LINC02574	7.2145
chr20	48657076	48658434	1359	*	61	0	0	5.6e-45	0	3.1712	1.4102	AL035106.1, PREX1	7.2145
chr8	144270321	144271680	1360	*	108	0	0	5.39e-53	0	4.92129	3.43608	BOP1	7.21524
chr8	23482892	23484252	1361	*	88	0	0	8.2e-69	0	6.45513	1.39699	AC104561.1, AC104561.2	7.21598
chr21	46049080	46050440	1361	*	58	0	0	1.42e-49	0	3.60573	2.02689	intergenic	7.21598
chr2	239002778	239004139	1362	*	60	0	0	9.77e-45	0	-5.27787	-2.94478	intergenic	7.21671
chr8	19236577	19237938	1362	*	123	0	0	1.06e-38	0	2.62007	1.1688	AC068880.1, AC100849.1	7.21671
chr1	3732090	3733451	1362	*	124	0	0	3.45e-71	0	4.57394	2.56419	TP73	7.21671
chr3	131361171	131362533	1363	*	139	0	0	3.09e-43	0	5.24736	1.28281	NUDT16P1, AC010210.1	7.21744
chr12	132760376	132761738	1363	*	65	0	0	1.04e-63	0	5.24396	1.53685	ANKLE2	7.21744
chr20	63843807	63845170	1364	*	56	0	0	2.76e-26	0	-3.50512	-1.52112	C20orf181	7.21818
chr2	42827515	42828878	1364	*	114	0	0	1.94e-61	0	2.8544	1.0636	CHORDC1P1	7.21818
chr1	114001675	114003038	1364	*	54	0	0	1.3e-55	0	4.58926	2.23239	OLFML3, AL591742.1	7.21818
chr2	120521313	120522678	1366	*	65	0	0	1.74e-47	0	-3.51717	-1.44943	intergenic	7.21964
chr1	22285018	22286384	1367	*	78	0	0	1.24e-47	0	3.27349	1.36876	intergenic	7.22037
chr18	22417840	22419206	1367	*	58	0	0	1.18e-61	0	4.64925	2.1535	CTAGE1, ATP7BP1	7.22037
chr14	55440289	55441656	1368	*	81	0	0	8.37e-35	0	2.23564	1.27763	TBPL2	7.22111
chr16	21520146	21521513	1368	*	72	0	0	8.71e-70	0	6.75078	1.38273	SMG1P3, SLC7A5P2	7.22111
chr16	85136349	85137716	1368	*	50	0	0	2.24e-33	0	3.47743	1.55515	LINC02139	7.22111
chr21	42061625	42062993	1369	*	84	0	0	3.58e-84	0	-5.0928	-2.70497	UMODL1	7.22184
chr12	7438941	7440309	1369	*	108	0	0	8.98e-31	0	2.36895	1.41176	CD163L1, AC131206.1	7.22184
chr19	17393777	17395145	1369	*	128	0	0	9.91e-30	0	2.80766	1.68334	CCDC194	7.22184
chr3	195035037	195036405	1369	*	78	0	0	4.27e-62	0	4.11086	1.85157	intergenic	7.22184
chr21	44505718	44507086	1369	*	111	0	0	2.96e-83	0	6.33543	1.89829	TSPEAR-AS1, TSPEAR	7.22184
chr16	81545625	81546994	1370	*	55	0	0	4.14e-67	0	-4.97079	-2.25206	CMIP	7.22257
chr18	79637527	79638896	1370	*	278	0	0	1.5e-71	0	5.17974	1.32749	intergenic	7.22257
chr20	63663616	63664986	1371	*	52	0	0	8.56e-51	0	4.05411	1.31847	RTEL1, RTEL1-TNFRSF6B	7.2233
chr17	82795275	82796645	1371	*	67	0	0	3.95e-72	0	7.72137	1.8827	TBCD, AC068014.1	7.2233
chr7	23709095	23710466	1372	*	93	0	0	7.01e-45	0	2.78282	1.09857	STK31	7.22402
chr16	88062931	88064302	1372	*	78	0	0	2.99e-64	0	5.10283	1.21095	BANP	7.22402
chr2	53859640	53861011	1372	*	142	0	0	2.08e-24	0	3.77322	3.25584	ASB3, GPR75	7.22402
chr18	63936166	63937538	1373	*	140	0	0	1.68e-49	0	4.28984	1.01398	intergenic	7.22475
chr10	132446846	132448219	1374	*	58	0	0	1.39e-57	0	5.26504	2.11691	LINC02870	7.22548
chr3	141367148	141368521	1374	*	57	0	0	5.47e-56	0	4.30702	3.15334	PXYLP1, ZBTB38	7.22548
chr5	179559053	179560427	1375	*	113	0	0	2.51e-34	0	3.40127	1.97649	RUFY1	7.22621
chr6	26232776	26234151	1376	*	87	0	0	2.66e-42	0	3.70265	1.15597	H2AC9P	7.22694
chr8	2198724	2200099	1376	*	60	0	0	6.2e-72	0	6.24042	2.47118	intergenic	7.22694
chr1	1425590	1426965	1376	*	66	0	0	5.36e-58	0	6.18599	2.48867	TMEM88B	7.22694
chr17	932503	933878	1376	*	61	0	0	8.43e-54	0	5.76029	2.99779	NXN	7.22694
chr18	64001857	64003233	1377	*	97	0	0	1.03e-35	0	2.40769	1.01031	SERPINB8	7.22766
chr16	31141949	31143325	1377	*	182	0	0	2.6e-40	0	3.42006	1.05214	PRSS36	7.22766
chr19	17172296	17173672	1377	*	67	0	0	2.76e-55	0	3.81721	1.25496	MYO9B	7.22766
chr19	17831214	17832590	1377	*	96	0	0	1.68e-29	0	4.18693	2.57257	JAK3	7.22766
chr5	170352536	170353912	1377	*	54	0	0	5.97e-91	0	6.20982	3.64543	KCNIP1	7.22766
chr2	176490343	176491720	1378	*	96	0	0	2.94e-71	0	7.90264	4.67235	intergenic	7.22839
chr4	3301647	3303025	1379	*	55	0	0	2.29e-64	0	-5.10145	-3.26229	RGS12	7.22911
chr15	81117365	81118743	1379	*	81	0	0	2.82e-32	0	2.8257	1.8861	CFAP161, ANP32BP3	7.22911
chr4	24794207	24795585	1379	*	74	0	0	3.73e-81	0	8.4092	4.49031	SOD3	7.22911
chr5	886886	888265	1380	*	74	0	0	7.55e-50	0	-5.21972	-1.28234	BRD9	7.22984
chr6	170229057	170230436	1380	*	59	0	0	4.23e-50	0	2.69359	1.15487	intergenic	7.22984
chr6	33116642	33118022	1381	*	85	0	0	1.75e-22	0	2.45413	1.10415	HLA-DPB2	7.23056
chr13	44434238	44435618	1381	*	86	0	0	2.12e-52	0	5.37127	1.4337	TSC22D1	7.23056
chr18	44743750	44745130	1381	*	75	0	0	9.18e-38	0	4.10273	2.05018	SETBP1	7.23056
chr1	148309070	148310450	1381	*	114	0	0	4.04e-34	0	3.31892	2.26425	AC245100.1, LINC01138	7.23056
chr8	142307202	142308583	1382	*	56	0	5.76e-179	1.4e-48	0	-5.41592	-1.13784	TSNARE1	7.23129
chr6	6723927	6725308	1382	*	92	0	0	4.38e-44	0	3.81072	1.20389	AL031123.5, AL031123.1	7.23129
chr22	37750008	37751389	1382	*	72	0	0	5.04e-72	0	7.31473	4.65219	TRIOBP	7.23129
chr12	121775008	121776390	1383	*	77	0	0	5.19e-61	0	5.76784	1.96359	TMEM120B	7.23201
chr5	3103531	3104913	1383	*	50	0	0	4.53e-33	0	3.03758	2.04772	intergenic	7.23201
chr10	48684120	48685504	1385	*	54	0	0	9.37e-30	0	-3.31593	-2.29234	WDFY4	7.23346
chr6	126339098	126340482	1385	*	80	0	0	9.96e-71	0	6.84467	1.08472	CENPW, AL356534.1	7.23346
chr3	42148242	42149627	1386	*	50	0	0	2.26e-59	0	4.56561	1.08516	TRAK1	7.23418
chr17	78798390	78799776	1387	*	74	0	0	1.41e-43	0	-3.01028	-1.23676	USP36	7.2349
chr10	61000853	61002239	1387	*	99	0	0	2.14e-51	0	3.83781	1.01104	RHOBTB1	7.2349
chr20	62735371	62736757	1387	*	66	0	0	7.62e-51	0	3.80704	1.08677	NTSR1	7.2349
chr22	49631379	49632765	1387	*	164	0	0	3.92e-31	0	4.00981	1.49395	C22orf34	7.2349
chr11	58967774	58969160	1387	*	56	0	0	4.92e-28	0	3.07685	1.92456	GLYATL1, AP001636.3, AP001636.2	7.2349
chr7	149414754	149416143	1390	*	111	0	0	5.26e-43	0	4.02676	1.4581	intergenic	7.23706
chr2	240749242	240750631	1390	*	53	0	0	4.57e-70	0	5.42343	2.27636	KIF1A	7.23706
chr10	618756	620145	1390	*	58	0	0	5.49e-76	0	6.90727	2.67033	DIP2C	7.23706
chr14	101586822	101588213	1392	*	70	0	0	1.47e-44	0	-4.56176	-2.81805	intergenic	7.2385
chr22	46673269	46674660	1392	*	119	0	0	9.84e-29	0	-3.80429	-1.58817	GRAMD4	7.2385
chr13	111319472	111320863	1392	*	80	0	0	5.88e-36	0	2.6735	1.11712	TEX29	7.2385
chr20	36436003	36437394	1392	*	94	0	0	7.33e-28	0	2.10723	1.147	DLGAP4	7.2385
chr17	75844578	75845969	1392	*	54	0	0	1.84e-71	0	5.69443	2.32395	WBP2	7.2385
chr10	130202968	130204360	1393	*	61	0	0	5.74e-26	0	-2.99179	-1.07955	intergenic	7.23921
chr9	130450875	130452267	1393	*	56	0	0	5.05e-66	0	5.25049	1.7744	ASS1	7.23921
chr14	104107072	104108464	1393	*	50	0	0	4.24e-72	0	6.7718	4.18766	ASPG	7.23921
chr19	49500395	49501788	1394	*	76	0	0	4.89e-59	0	-3.87828	-1.26187	MIR150	7.23993
chr11	26993813	26995206	1394	*	56	0	0	5.85e-28	0	2.45137	1.21934	FIBIN	7.23993
chr8	1840110	1841503	1394	*	62	0	0	4.02e-36	0	2.7793	1.51603	AC019257.8, ARHGEF10	7.23993
chr19	55358138	55359532	1395	*	52	0	0	1.5e-50	0	-4.62836	-2.16489	AC020922.1, FAM71E2	7.24065
chr8	10590263	10591657	1395	*	66	0	0	6.55e-29	0	-3.51514	-1.67594	intergenic	7.24065
chr9	19934288	19935682	1395	*	77	0	0	2.79e-42	0	2.66005	1.09284	intergenic	7.24065
chr12	119718239	119719634	1396	*	57	0	0	3.05e-49	0	-5.69674	-1.58821	CIT	7.24137
chr3	184583329	184584724	1396	*	177	0	0	2.2e-62	0	5.84178	2.05907	intergenic	7.24137
chr19	42095336	42096731	1396	*	145	0	0	4.95e-63	0	6.11718	2.74398	POU2F2	7.24137
chr4	15701979	15703375	1397	*	92	0	0	1.68e-45	0	4.0844	1.16121	AC114744.2, BST1	7.24208
chr1	26161099	26162496	1398	*	231	0	0	2.01e-72	0	4.56768	1.14117	FAM110D	7.2428
chr6	37101486	37102883	1398	*	77	0	0	8.21e-61	0	5.94504	1.38746	intergenic	7.2428
chr19	1220443	1221840	1398	*	90	0	0	2.66e-63	0	6.40394	1.40431	STK11	7.2428
chr9	127963338	127964737	1400	*	51	0	0	2.07e-49	0	-3.12072	-1.06937	FAM102A	7.24423
chr11	121362863	121364262	1400	*	90	0	0	2.23e-40	0	2.86352	1.50381	BMPR1AP2	7.24423
chr17	75753505	75754905	1401	*	180	0	0	4.6e-73	0	7.80065	1.88875	ITGB4, GALK1	7.24494
chr17	3534731	3536132	1402	*	95	0	0	1.03e-57	0	5.27356	1.12846	TRPV3	7.24566
chr17	8056577	8057979	1403	*	57	0	0	4.64e-44	0	-4.33209	-1.21879	AC129492.2	7.24637
chr9	135116190	135117593	1404	*	53	0	0	3.93e-56	0	5.7846	1.98981	OLFM1	7.24708
chr20	31848892	31850297	1406	*	109	0	0	1.54e-30	0	2.49208	1.22632	DUSP15	7.2485
chr7	6550932	6552337	1406	*	86	0	0	3.49e-35	0	3.19158	2.04754	GRID2IP	7.2485
chr6	168691639	168693045	1407	*	92	0	0	2.65e-68	0	5.64418	1.145	intergenic	7.24922
chr5	81393976	81395383	1408	*	80	0	0	6.13e-75	0	6.53189	1.03061	ACOT12	7.24993
chr22	26671389	26672798	1410	*	56	0	0	1.29e-82	0	-7.66003	-1.7001	MIAT, Z99774.4, Z99774.2, MIATNB, Z99774.1	7.25134
chr13	114146090	114147499	1410	*	55	0	0	3.19e-67	0	3.83978	1.0995	intergenic	7.25134
chr2	74130383	74131792	1410	*	101	0	0	3.12e-44	0	4.03829	1.36275	AC073263.1	7.25134
chr1	162366176	162367585	1410	*	113	0	0	1.29e-66	0	5.05129	3.08679	NOS1AP, AL512785.2	7.25134
chr2	68773877	68775287	1411	*	82	0	0	2.93e-24	0	-3.57328	-2.55867	ARHGAP25	7.25205
chr11	57636977	57638387	1411	*	62	0	0	2.72e-55	0	3.92586	1.02439	AP000662.1	7.25205
chr17	21252932	21254342	1411	*	90	0	0	1.01e-75	0	5.43746	1.14125	NATD1	7.25205
chr1	83860451	83861861	1411	*	130	0	0	2.42e-48	0	4.02286	2.14631	LINC01725	7.25205
chr10	3398023	3399433	1411	*	54	0	0	1.13e-76	0	6.81322	3.09906	AL356433.1	7.25205
chr19	12647182	12648593	1412	*	117	0	0	4.55e-22	0	2.67271	1.28997	AC010422.3, MAN2B1	7.25276
chr1	1121897	1123308	1412	*	93	0	0	1.42e-78	0	6.34034	1.83168	intergenic	7.25276
chr10	131933190	131934602	1413	*	60	0	0	1.17e-52	0	-4.67703	-1.47294	PPP2R2D	7.25347
chr13	40921431	40922843	1413	*	137	0	0	7.08e-58	0	4.70357	1.08516	TPTE2P5, SUGT1P3	7.25347
chr2	26674410	26675823	1414	*	52	0	0	4.69e-75	0	5.48951	2.14017	AC015977.1	7.25418
chr17	51121041	51122455	1415	*	63	0	8.95e-261	2.64e-54	0	5.3087	1.07914	intergenic	7.25488
chr12	109115548	109116962	1415	*	57	0	0	6.06e-76	0	4.98962	1.17735	AC007637.1, ACACB	7.25488
chr4	73998396	73999811	1416	*	84	0	0	7.16e-59	0	3.19867	1.40343	AC097709.1, CXCL5	7.25559
chr5	3186906	3188321	1416	*	57	0	0	1.23e-71	0	6.64334	3.23276	intergenic	7.25559
chr16	86302935	86304351	1417	*	63	0	0	1.03e-74	0	5.02859	2.59594	intergenic	7.2563
chr6	49713465	49714882	1418	*	71	0	0	4.56e-54	0	4.36439	2.40199	AL121974.1, CRISP2	7.257
chr22	38222531	38223948	1418	*	54	0	0	3.13e-69	0	5.8304	3.08172	TMEM184B	7.257
chr16	49698257	49699675	1419	*	66	0	0	2.34e-37	0	-2.26837	-1.10093	ZNF423	7.25771
chr5	172106630	172108048	1419	*	88	0	0	1.2e-66	0	5.93902	1.82384	STK10	7.25771
chr1	6143939	6145358	1420	*	68	0	0	1.58e-31	0	3.13369	1.27985	CHD5	7.25841
chr7	29883722	29885141	1420	*	64	0	0	2.56e-25	0	3.16687	1.37628	WIPF3	7.25841
chr2	3535950	3537369	1420	*	52	0	0	5.67e-76	0	7.92536	5.21229	AC108488.1, AC108488.2	7.25841
chr6	169288808	169290228	1421	*	50	0	0	7.48e-48	0	-3.80873	-1.09274	BX322234.2	7.25912
chr17	76120877	76122297	1421	*	101	0	0	1.19e-55	0	4.78868	1.24223	EXOC7	7.25912
chr1	118184962	118186382	1421	*	78	0	0	7.22e-67	0	4.68035	1.39319	AL391557.1, SPAG17	7.25912
chr12	52078973	52080393	1421	*	181	0	0	3.48e-47	0	3.56442	2.62391	SMIM41, AC025259.1	7.25912
chrX	153982006	153983427	1422	*	103	0	0	1.03e-23	0	-2.69971	-1.25614	TMEM187	7.25982
chr6	166655780	166657201	1422	*	65	0	0	3.85e-57	0	4.7036	1.30527	RPS6KA2	7.25982
chr20	62026025	62027447	1423	*	68	0	0	1.65e-34	0	-3.17327	-1.16453	TAF4	7.26052
chr19	2982796	2984218	1423	*	67	0	0	4.68e-35	0	4.32735	1.03164	TLE6	7.26052
chr1	160369894	160371316	1423	*	62	0	0	2.81e-45	0	2.66658	1.90728	NHLH1	7.26052
chr7	4711959	4713382	1424	*	64	0	0	2.99e-55	0	-4.43814	-1.96264	FOXK1	7.26123
chr14	93926061	93927484	1424	*	62	0	0	3.14e-32	0	-3.29754	-1.96055	FAM181A, FAM181A-AS1	7.26123
chr6	77466237	77467660	1424	*	71	0	0	1.82e-71	0	6.02268	1.49678	intergenic	7.26123
chr14	55297928	55299352	1425	*	66	0	0	1.53e-45	0	-3.97814	-1.20697	FBXO34, CHMP4BP1	7.26193
chr6	168625118	168626543	1426	*	116	0	0	6.86e-57	0	5.40053	1.9536	SMOC2	7.26263
chr19	5133898	5135323	1426	*	62	0	0	5.36e-70	0	5.92043	2.81706	KDM4B	7.26263
chr6	168345076	168346502	1427	*	51	0	0	1.4e-33	0	-2.54093	-1.47168	intergenic	7.26333
chr11	119310732	119312159	1428	*	89	0	0	3.22e-47	0	-3.14742	-1.04739	CBL, MCAM	7.26403
chr19	41376163	41377590	1428	*	104	0	0	9.58e-37	0	3.83783	1.00209	AC011462.1, TMEM91	7.26403
chr16	83137019	83138447	1429	*	54	0	0	8.38e-35	0	-3.801	-1.40171	CDH13	7.26473
chr6	28489371	28490799	1429	*	96	0	0	8.55e-54	0	4.09304	1.34142	Z98745.1, Z98745.2	7.26473
chr6	26743109	26744538	1430	*	66	0	0	9.25e-34	0	2.49788	1.27778	intergenic	7.26543
chr8	22175882	22177311	1430	*	66	0	0	4.48e-60	0	4.74177	2.21812	BMP1	7.26543
chr10	120948997	120950427	1431	*	141	0	0	5.9e-64	0	6.57201	3.44676	AC010998.1	7.26613
chr12	130818470	130819901	1432	*	140	0	0	9.23e-43	0	3.15506	1.12831	STX2	7.26683
chr5	135190341	135191772	1432	*	142	0	0	1.37e-63	0	4.11823	1.1609	C5orf66	7.26683
chr2	25203352	25204783	1432	*	126	0	0	2.57e-43	0	4.41563	2.21502	LINC01381	7.26683
chr16	29256498	29257930	1433	*	62	0	0	6.19e-46	0	3.64916	1.11301	AC009093.11, AC009093.10	7.26753
chr11	64607146	64608578	1433	*	104	0	0	3.8e-28	0	3.18389	1.22975	NRXN2	7.26753
chr2	129877202	129878635	1434	*	65	0	0	6.25e-29	0	3.32228	1.82879	AC079776.5, LINC02572	7.26822
chr9	92146603	92148036	1434	*	50	0	0	1.87e-46	0	4.44707	1.96031	LINC00475	7.26822
chr11	65797229	65798663	1435	*	56	0	0	1.33e-33	0	2.64587	1.24755	intergenic	7.26892
chr7	159030378	159031813	1436	*	186	0	0	1.33e-48	0	3.7094	1.09763	VIPR2	7.26962
chr9	93575352	93576787	1436	*	83	0	0	8.33e-38	0	3.85442	1.24885	PHF2	7.26962
chr19	35448620	35450055	1436	*	66	0	0	4.07e-54	0	4.34923	1.38842	FFAR2	7.26962
chr6	166168975	166170411	1437	*	144	0	0	1.74e-53	0	4.45213	1.07693	LNCDAT	7.27031
chr7	155202715	155204151	1437	*	54	0	0	5.29e-81	0	7.12865	3.66304	AC099552.3	7.27031
chr12	111181110	111182549	1440	*	68	0	0	1.61e-87	0	-8.16385	-3.56126	CUX2	7.2724
chr2	88690686	88692126	1441	*	178	0	0	1.46e-84	0	8.85074	1.12968	RPIA, AC062029.1	7.27309
chr3	72446520	72447960	1441	*	169	0	0	8.16e-56	0	5.30022	1.21482	RYBP	7.27309
chr1	2982607	2984047	1441	*	69	0	0	9.38e-43	0	2.96683	1.27023	intergenic	7.27309
chr7	134890195	134891635	1441	*	60	0	0	9.74e-38	0	4.41147	1.42767	CALD1, AC083870.1	7.27309
chr1	43284956	43286396	1441	*	58	0	0	2.01e-31	0	3.8796	1.72516	C1orf210	7.27309
chr10	133218644	133220086	1443	*	78	0	0	4.63e-31	0	-2.73101	-1.05955	KNDC1	7.27448
chr13	114010841	114012283	1443	*	76	0	0	1.94e-69	0	5.26383	1.85793	RASA3	7.27448
chr21	44711079	44712522	1444	*	106	0	0	9.08e-33	0	3.09756	1.05608	TSPEAR	7.27517
chr19	48728160	48729603	1444	*	161	0	0	3.53e-32	0	4.18309	3.18633	RASIP1	7.27517
chr7	151426565	151428009	1445	*	66	0	0	5.44e-63	0	4.79633	1.67632	AC005996.1	7.27586
chr11	119708433	119709878	1446	*	52	0	0	2.55e-66	0	-4.04028	-2.32379	NECTIN1	7.27656
chr6	25217676	25219121	1446	*	80	0	0	7.93e-30	0	-4.10699	2.29015	AL590084.2, CMAHP	7.27656
chr20	19973943	19975389	1447	*	72	0	5.54e-290	1.55e-70	0	-5.50567	1.03021	RIN2	7.27725
chr19	35528004	35529450	1447	*	57	0	0	2.78e-55	0	4.4664	1.14624	SBSN	7.27725
chr17	8222870	8224317	1448	*	90	0	0	9.71e-39	0	3.92739	1.00334	LINC00324	7.27794
chr12	49548376	49549823	1448	*	137	0	0	4.06e-32	0	3.53931	1.2986	KCNH3	7.27794
chr1	225911325	225912773	1449	*	76	0	0	4.47e-58	0	3.48565	1.67926	LEFTY1, AL117348.2	7.27863
chr2	208111912	208113360	1449	*	71	0	0	2.91e-40	0	4.34156	2.81687	CRYGEP	7.27863
chr18	711755	713205	1451	*	211	0	0	7.14e-34	0	3.34993	1.08475	ENOSF1	7.28001
chr1	2334370	2335820	1451	*	122	0	0	1.81e-32	0	3.8261	1.2304	MORN1	7.28001
chr9	134408934	134410385	1452	*	89	0	0	2.43e-63	0	-4.39812	-2.06287	RXRA	7.2807
chr1	3657933	3659384	1452	*	65	0	0	3.73e-58	0	4.5658	1.50502	TP73, TP73-AS3	7.2807
chr9	95044058	95045509	1452	*	66	0	0	9.81e-41	0	4.11942	3.36015	AOPEP	7.2807
chr20	57671702	57673154	1453	*	80	0	0	7.66e-58	0	-4.74857	-2.4311	PMEPA1	7.28139
chr4	3389031	3390483	1453	*	53	0	0	4.7e-41	0	-3.41745	-1.37651	RGS12	7.28139
chr1	43068283	43069735	1453	*	80	0	2.75e-205	8.9e-72	0	8.28387	1.21872	intergenic	7.28139
chr10	104268156	104269608	1453	*	142	0	0	2.72e-40	0	3.61957	2.56478	GSTO2, MIR4482	7.28139
chr12	124456693	124458146	1454	*	77	0	0	4.36e-65	0	-4.96129	-3.01549	NCOR2	7.28207
chr10	513377	514830	1454	*	85	0	0	8.77e-54	0	-4.52371	-1.48018	DIP2C	7.28207
chr16	88327753	88329206	1454	*	96	0	0	5.1e-64	0	4.73992	1.32025	intergenic	7.28207
chr4	3430017	3431471	1455	*	64	0	0	1.9e-47	0	-3.3042	-1.27306	RGS12	7.28276
chr17	81451997	81453452	1456	*	126	0	0	1.08e-44	0	-3.57361	-1.32545	BAHCC1	7.28345
chr3	13276717	13278172	1456	*	70	0	0	6.49e-34	0	-3.82182	-1.27174	IQSEC1	7.28345
chr13	113187372	113188827	1456	*	58	0	0	5.11e-74	0	7.54045	1.73669	PCID2	7.28345
chr4	7810920	7812375	1456	*	86	0	0	2.51e-23	0	3.31527	1.73871	AFAP1	7.28345
chr8	2075143	2076599	1457	*	60	0	0	4.22e-101	0	-8.39563	-1.54314	MYOM2, MIR7160	7.28413
chr17	8798594	8800050	1457	*	131	0	0	1.16e-46	0	3.76292	2.47354	MFSD6L	7.28413
chr6	31791612	31793068	1457	*	63	0	0	1.15e-67	0	5.58042	3.12099	VARS1	7.28413
chr11	46360934	46362391	1458	*	55	0	0	1.39e-83	0	-5.14322	-3.65739	DGKZ	7.28482
chr11	47171629	47173086	1458	*	57	0	0	2.26e-28	0	-2.4593	-1.07956	ARFGAP2	7.28482
chr22	39893515	39894972	1458	*	58	0	0	5.69e-55	0	3.64558	1.74093	ENTHD1	7.28482
chr4	8239597	8241055	1459	*	74	0	0	1.11e-37	0	-3.75047	-1.18697	SH3TC1	7.28551
chr8	22703408	22704866	1459	*	155	0	0	3.6e-38	0	3.54845	1.20886	AC055854.1, AC105046.2	7.28551
chr19	17579529	17580988	1460	*	57	0	0	3.05e-52	0	-4.6854	-2.94012	COLGALT1	7.28619
chr11	2850169	2851628	1460	*	89	0	0	5.39e-35	0	-3.20451	-1.45265	KCNQ1-AS1	7.28619
chr20	44713945	44715404	1460	*	63	0	0	6.44e-30	0	-3.51768	-1.18255	CCN5, KCNK15-AS1	7.28619
chr10	133388727	133390187	1461	*	102	0	0	2.85e-35	0	-2.86723	-1.59041	PAOX, AL360181.3	7.28688
chr6	6736791	6738252	1462	*	52	0	0	4.68e-33	0	2.15421	1.11016	AL031123.1	7.28756
chr16	84312754	84314215	1462	*	97	0	0	2.3e-30	0	3.29062	1.22685	WFDC1	7.28756
chr20	63802015	63803477	1463	*	92	0	0	3.23e-26	0	-2.88035	-1.13131	ZBTB46	7.28824
chr8	143037851	143039313	1463	*	60	0	0	7.33e-66	0	5.11957	2.89413	C8orf31	7.28824
chr5	14405222	14406685	1464	*	77	0	0	5.57e-29	0	4.45151	1.27873	TRIO	7.28893
chr11	86373983	86375447	1465	*	71	0	0	8.41e-38	0	3.52435	1.25327	CCDC81	7.28961
chr1	41422742	41424206	1465	*	79	0	0	1.03e-54	0	3.62055	1.39788	intergenic	7.28961
chr19	56663674	56665138	1465	*	280	0	0	8.74e-36	0	3.14337	2.17776	ZIM2-AS1, ZNF835	7.28961
chr2	208129499	208130963	1465	*	68	0	0	6.02e-84	0	9.09784	4.31106	CRYGC	7.28961
chr19	18446140	18447605	1466	*	66	0	0	1.07e-69	0	4.97372	1.63818	ELL	7.29029
chr6	50835175	50836641	1467	*	78	0	0	2.08e-54	0	-4.26609	-2.10143	TFAP2B	7.29097
chr9	135464365	135465831	1467	*	80	0	0	1.1e-79	0	6.78628	1.86203	PPP1R26-AS1	7.29097
chr12	124419967	124421434	1468	*	68	0	0	2.6e-77	0	9.1749	1.29151	NCOR2	7.29166
chr1	202121701	202123168	1468	*	50	0	0	5.22e-79	0	6.06125	4.63178	GPR37L1	7.29166
chr19	17239916	17241385	1470	*	66	0	0	3.41e-34	0	-3.23622	-1.09561	NR2F6, AC010646.1	7.29302
chr6	158042395	158043864	1470	*	52	0	0	3.41e-81	0	8.1427	2.12561	SYNJ2	7.29302
chr4	866991	868461	1471	*	110	0	0	1.5e-49	0	5.36806	1.47803	GAK	7.2937
chr15	36579140	36580611	1472	*	119	0	0	3.22e-60	0	5.27015	1.02158	CDIN1	7.29438
chr8	86069323	86070795	1473	*	113	0	0	2.1e-43	0	2.62012	1.25272	ATP6V0D2, PSKH2	7.29506
chr15	72289168	72290641	1474	*	112	0	0	1.13e-31	0	2.34487	1.3578	AC009690.2, AC009690.3, CELF6, AC009690.1	7.29574
chr11	117299802	117301275	1474	*	56	0	0	4.26e-34	0	4.11203	2.79317	BACE1	7.29574
chr19	45395581	45397055	1475	*	209	0	0	7.43e-46	0	-4.19391	-2.94465	PPP1R13L	7.29641
chr12	75390134	75391609	1476	*	75	0	0	1.25e-17	0	2.06444	1.26819	GLIPR1L2, CAPS2	7.29709
chr13	112898067	112899542	1476	*	109	0	0	7.94e-83	0	5.82074	1.84088	MCF2L	7.29709
chr16	1763735	1765211	1477	*	129	0	0	2.77e-48	0	4.32815	2.74393	MAPK8IP3	7.29777
chr2	237707633	237709109	1477	*	63	0	0	4.01e-83	0	6.6698	4.81901	LRRFIP1	7.29777
chr1	245687786	245689263	1478	*	234	0	0	4.31e-55	0	-4.28777	-2.2406	KIF26B	7.29845
chr16	88744563	88746040	1478	*	62	0	0	3.02e-67	0	5.32568	2.09338	AC138028.1, PIEZO1	7.29845
chr13	43022441	43023919	1479	*	107	0	0	3.47e-84	0	8.28429	-1.49697	DNAJC15	7.29912
chr4	56592448	56593926	1479	*	91	0	0	3.04e-33	0	2.23648	1.15065	THEGL, GLDCP1	7.29912
chr2	219459839	219461319	1481	*	72	0	0	2.17e-69	0	6.03605	2.79029	SPEG	7.30047
chr5	14497139	14498620	1482	*	74	0	0	9.33e-51	0	-4.4594	-1.52733	TRIO	7.30115
chr12	124538506	124539987	1482	*	56	0	0	4.73e-36	0	-3.41797	-1.43756	AC073592.3, NCOR2	7.30115
chrX	31071341	31072822	1482	*	83	0	0	3.81e-38	0	-4.0665	-1.22476	FTHL17	7.30115
chr1	54979718	54981199	1482	*	202	0	0	1.2e-37	0	3.24424	1.01407	TMEM61, AL590440.2, AL590440.1	7.30115
chr11	368350	369831	1482	*	86	0	0	9.33e-61	0	4.44586	1.58298	B4GALNT4	7.30115
chr21	44509236	44510717	1482	*	93	0	0	4.61e-77	0	6.81252	1.59676	TSPEAR-AS1, TSPEAR	7.30115
chr20	661706	663188	1483	*	61	0	5.32e-297	3.64e-15	0	2.182	1.09347	AL121758.1, SCRT2	7.30182
chr11	68037763	68039246	1484	*	148	0	0	5.66e-75	0	5.05783	1.04825	TCIRG1	7.3025
chr17	28306868	28308351	1484	*	111	0	0	1.41e-59	0	3.85259	1.87922	KRT18P55	7.3025
chr8	123235693	123237177	1485	*	50	0	0	1.06e-45	0	-5.12423	-2.82674	UBA52P5, C8orf76, ZHX1-C8orf76	7.30317
chr17	21310687	21312171	1485	*	70	0	0	4.17e-26	0	-3.40878	-1.60114	MAP2K3	7.30317
chr6	163971433	163972917	1485	*	132	0	0	2.8e-72	0	4.72361	1.25119	AL078602.1	7.30317
chr4	7635068	7636553	1486	*	69	0	0	1.03e-74	0	-6.93787	-2.33652	SORCS2	7.30384
chr6	393481	394966	1486	*	92	0	0	1.21e-61	0	4.99326	1.20665	IRF4	7.30384
chr19	52200081	52201566	1486	*	53	0	0	8.22e-56	0	5.49323	1.74054	PPP2R1A	7.30384
chr16	85234391	85235877	1487	*	84	0	0	1.24e-56	0	3.79413	1.51807	GSE1, AC092275.1	7.30452
chr1	201946288	201947775	1488	*	65	0	0	5.18e-38	0	3.61727	1.02142	LMOD1	7.30519
chr12	121452326	121453813	1488	*	160	0	0	3.18e-73	0	6.89452	2.59201	KDM2B	7.30519
chr5	172904249	172905736	1488	*	61	0	0	7.35e-58	0	5.20582	2.65415	ERGIC1	7.30519
chr5	2093483	2094971	1489	*	70	0	0	9.02e-46	0	-4.88338	-1.36001	AC124852.1	7.30586
chr14	64208801	64210289	1489	*	62	0	0	1.28e-28	0	-3.73602	-1.34042	SYNE2, ESR2	7.30586
chr5	77076507	77077996	1490	*	224	0	0	5.59e-53	0	4.85894	1.05142	AC008581.2, ZBED3	7.30653
chr7	76510020	76511509	1490	*	59	0	0	2.05e-40	0	4.56781	2.86284	UPK3B	7.30653
chrX	8783048	8784538	1491	*	83	0	0	1.48e-19	0	1.74513	1.17088	DRAXINP1	7.3072
chr17	49889436	49890926	1491	*	55	0	0	4.21e-58	0	5.37453	3.31921	AC027801.2	7.3072
chr2	235534154	235535645	1492	*	88	0	0	4.35e-53	0	-5.13597	-2.30088	AGAP1	7.30787
chr21	36245099	36246590	1492	*	156	0	0	4.85e-28	0	3.74565	1.04114	DOP1B	7.30787
chr5	150945870	150947362	1493	*	88	0	0	6.5e-25	0	3.32911	1.41451	ZNF300P1	7.30854
chr11	64759685	64761178	1494	*	66	0	0	1.33e-53	0	4.634	2.48275	PYGM	7.30921
chr19	11361184	11362677	1494	*	156	0	0	4.4e-68	0	6.20991	3.62754	PLPPR2	7.30921
chr17	21452460	21453954	1495	*	92	0	0	9.3e-26	0	2.72801	1.30288	LINC02693	7.30988
chr11	67070468	67071962	1495	*	106	0	0	6.22e-35	0	3.07581	1.45131	RHOD	7.30988
chr10	92695767	92697261	1495	*	73	0	0	1.14e-52	0	4.70351	3.48312	intergenic	7.30988
chr20	63695738	63697233	1496	*	146	0	0	3.15e-75	0	-5.13529	-1.04811	RTEL1, RTEL1-TNFRSF6B, TNFRSF6B	7.31055
chr2	104867038	104868533	1496	*	169	0	0	2.46e-48	0	4.32654	1.28376	AC018730.1, LINC01159	7.31055
chr21	44966821	44968317	1497	*	54	0	0	4.51e-52	0	-4.95441	-2.45181	FAM207A	7.31122
chr5	14491339	14492836	1498	*	74	0	0	2.57e-79	0	6.32477	2.66388	TRIO	7.31189
chr6	100469039	100470537	1499	*	111	0	0	3.71e-47	0	-3.36679	-1.86333	intergenic	7.31255
chr7	152675811	152677309	1499	*	125	0	0	4.77e-70	0	7.00329	1.07167	XRCC2	7.31255
chr7	98202577	98204076	1500	*	52	0	5.72e-299	2.17e-91	0	-8.38394	-1.39988	LMTK2	7.31322
chr14	105055480	105056979	1500	*	124	0	0	1.32e-51	0	4.26855	2.75483	GPR132	7.31322
chr2	240891998	240893498	1501	*	55	0	0	5.67e-57	0	5.05964	3.15503	MAB21L4	7.31389
chr7	129784672	129786173	1502	*	160	0	0	9.71e-22	0	2.39135	1.19665	AC084864.1	7.31455
chr16	85208212	85209714	1503	*	108	0	0	9.29e-50	0	3.12028	1.09091	GSE1	7.31522
chr19	6214976	6216478	1503	*	111	0	0	1.84e-49	0	3.88632	1.45332	MLLT1	7.31522
chr2	232900905	232902407	1503	*	127	0	0	2.34e-75	0	7.13843	1.49551	NGEF	7.31522
chr13	113977482	113978985	1504	*	58	0	0	1.01e-67	0	5.65339	1.42143	RASA3	7.31588
chr6	30126522	30128025	1504	*	109	0	0	1.8e-46	0	3.91605	1.6912	intergenic	7.31588
chr22	50730136	50731639	1504	*	109	0	0	4.89e-34	0	3.17674	2.20259	SHANK3	7.31588
chr9	127741589	127743092	1504	*	66	0	0	1.5e-71	0	6.22533	4.62814	SH2D3C	7.31588
chr1	201127103	201128607	1505	*	60	0	0	4.85e-43	0	3.15171	1.61614	ASCL5	7.31655
chr21	43361805	43363310	1506	*	146	0	0	5.96e-51	0	3.62278	1.20671	LINC01679	7.31721
chr2	162838507	162840014	1508	*	91	0	0	3.33e-32	0	2.89069	1.14151	KCNH7	7.31854
chr10	45198084	45199591	1508	*	113	0	0	1.11e-32	0	1.79213	1.20036	AL512324.6	7.31854
chr4	3511631	3513138	1508	*	121	0	0	4.3e-75	0	6.19666	1.34091	LRPAP1	7.31854
chr17	29612242	29613751	1510	*	261	0	0	2.85e-57	0	4.00394	1.55382	ABHD15-AS1, ANKRD13B	7.31986
chr10	104274051	104275560	1510	*	98	0	0	1.37e-71	0	8.21028	2.20411	GSTO2	7.31986
chr11	64629212	64630721	1510	*	97	0	0	4.88e-52	0	4.04512	2.76603	NRXN2	7.31986
chr19	947573	949083	1511	*	98	0	0	6.11e-72	0	6.66675	1.17252	ARID3A	7.32053
chr17	50269694	50271204	1511	*	55	0	0	1.33e-74	0	7.69413	4.47948	intergenic	7.32053
chr8	28775772	28777283	1512	*	74	0	0	3.32e-42	0	-3.47677	-1.26521	INTS9	7.32119
chr14	73718065	73719576	1512	*	127	0	0	1.08e-46	0	4.74122	2.27341	MIDEAS	7.32119
chr17	81128525	81130037	1513	*	62	0	0	5.2e-57	0	3.45259	1.4463	AATK	7.32185
chr19	38722702	38724214	1513	*	64	0	0	2.85e-74	0	5.76352	2.34123	ACTN4	7.32185
chr16	86733065	86734577	1513	*	83	0	0	3.79e-62	0	4.88397	2.515	LINC02188	7.32185
chrX	100411133	100412646	1514	*	113	0	0	5.57e-28	0	3.3375	1.30068	intergenic	7.32251
chr12	113077127	113078640	1514	*	134	0	0	2.15e-30	0	2.53093	1.36024	DTX1	7.32251
chr17	35432464	35433978	1515	*	60	0	0	3.64e-54	0	5.23125	2.21974	SLFN12	7.32317
chr8	143953490	143955004	1515	*	153	0	0	4.02e-77	0	7.60187	2.79441	PLEC	7.32317
chr4	2254756	2256271	1516	*	94	0	0	7.3e-45	0	-4.0979	-1.30703	MXD4	7.32383
chr4	155953263	155954779	1517	*	120	0	0	1.02e-22	0	2.11147	1.26599	CTSO	7.32449
chr17	81272734	81274251	1518	*	62	0	0	6.98e-25	0	-3.25221	-1.35746	SLC38A10	7.32515
chr10	6177880	6179397	1518	*	91	0	0	1.55e-54	0	3.49668	1.28909	PFKFB3	7.32515
chr1	165116768	165118285	1518	*	75	0	0	5.24e-61	0	6.00276	1.62642	intergenic	7.32515
chr19	32869637	32871154	1518	*	54	0	0	7.36e-69	0	4.94351	3.52199	SLC7A9	7.32515
chr1	89198150	89199669	1520	*	54	0	0	9.22e-71	0	-5.5836	-1.23688	AC099063.4, GBP4	7.32647
chr11	72696538	72698057	1520	*	96	0	0	1.47e-40	0	4.29508	1.16911	ARAP1	7.32647
chr2	240440825	240442345	1521	*	98	0	0	4.66e-55	0	-5.54024	-3.08451	GPC1	7.32712
chr7	4818673	4820193	1521	*	65	0	0	1.05e-54	0	3.00648	1.24755	RADIL	7.32712
chr10	114178438	114179958	1521	*	98	0	0	2.93e-55	0	3.46507	1.68569	TDRD1	7.32712
chr8	11847770	11849290	1521	*	87	0	0	1.21e-57	0	5.868	3.92296	CTSB	7.32712
chr4	80263090	80264611	1522	*	82	0	0	5.48e-57	0	3.81145	1.20831	intergenic	7.32778
chr5	180324118	180325639	1522	*	53	0	0	7.67e-69	0	3.76102	1.35857	GFPT2	7.32778
chr9	92973648	92975169	1522	*	57	0	0	1.24e-60	0	5.17372	3.27116	FGD3	7.32778
chr8	85437444	85438966	1523	*	104	0	0	1.08e-65	0	5.3606	1.52161	CA3	7.32844
chr7	128270807	128272329	1523	*	172	0	0	5.94e-55	0	4.55462	2.06842	intergenic	7.32844
chr2	120790961	120792483	1523	*	53	0	0	8.64e-69	0	6.22719	3.65107	GLI2	7.32844
chr14	80954387	80955911	1525	*	95	0	0	7.48e-45	0	4.87993	1.43936	TSHR, CEP128	7.32975
chr9	134652086	134653611	1526	*	88	0	0	2.55e-78	0	7.83249	4.69527	COL5A1, COL5A1-AS1	7.33041
chr6	3283761	3285287	1527	*	108	0	0	2.68e-51	0	-4.81658	-1.8744	PSMG4, SLC22A23	7.33106
chr19	3537695	3539221	1527	*	55	0	0	7.4e-40	0	4.13788	1.78454	FZR1, C19orf71, MFSD12	7.33106
chr16	15501040	15502566	1527	*	53	0	0	2.06e-50	0	4.12085	2.26953	AC140504.1, BMERB1	7.33106
chr11	787258	788785	1528	*	136	0	0	2.99e-34	0	-3.10277	-1.02389	CEND1	7.33171
chr16	57371515	57373043	1529	*	54	0	0	3.21e-31	0	3.80429	1.47369	CX3CL1	7.33237
chr21	45913033	45914562	1530	*	114	0	0	4.35e-41	0	2.50373	1.36493	PCBP3, AJ239328.1	7.33302
chr22	37565919	37567449	1531	*	78	0	0	1.46e-48	0	-3.92604	-2.51492	CDC42EP1	7.33368
chr7	27212921	27214451	1531	*	182	0	0	1.85e-63	0	5.44585	1.85904	AC004080.17	7.33368
chr12	121239465	121240996	1532	*	60	0	0	2.74e-98	0	-7.14017	-5.00234	CAMKK2	7.33433
chr16	88193852	88195383	1532	*	108	0	0	1.28e-85	0	-6.62288	-2.69243	LINC02182	7.33433
chr7	2613694	2615225	1532	*	106	0	0	4.85e-72	0	-5.90735	-2.16018	IQCE	7.33433
chr17	82292337	82293869	1533	*	195	0	0	8.48e-34	0	3.92211	1.00453	AC132872.1, LINC01970	7.33498
chr16	68737040	68738572	1533	*	196	0	0	2.84e-33	0	4.17013	1.21344	CDH1	7.33498
chr6	108716012	108717544	1533	*	51	0	0	7.62e-74	0	8.62974	7.0515	intergenic	7.33498
chr10	71511725	71513258	1534	*	53	0	0	2.79e-43	0	-4.19419	-1.08294	CDH23, CDH23-AS1	7.33563
chr19	5036066	5037599	1534	*	98	0	0	3.83e-54	0	4.90971	2.90462	KDM4B	7.33563
chr1	3203429	3204963	1535	*	51	0	0	2.36e-64	0	3.87606	1.35896	PRDM16	7.33629
chr8	926020	927555	1536	*	74	0	0	7.77e-43	0	-4.07914	-1.35917	DLGAP2	7.33694
chr20	46977991	46979526	1536	*	54	0	0	2.87e-42	0	-3.26895	-1.00628	EYA2	7.33694
chr22	50318450	50319985	1536	*	68	0	0	6.62e-57	0	3.1237	1.04814	DENND6B	7.33694
chr20	51008788	51010324	1537	*	192	0	0	5.38e-29	0	2.10728	1.07583	AL050404.1, KCNG1	7.33759
chr19	1974731	1976268	1538	*	76	0	0	2.2e-35	0	-2.74393	-1.02493	CSNK1G2	7.33824
chr7	158203675	158205212	1538	*	97	0	0	5.31e-33	0	2.29697	1.51387	PTPRN2	7.33824
chr1	1073900	1075438	1539	*	66	0	0	3.04e-70	0	6.44742	4.03657	RNF223	7.33889
chr8	141276902	141278441	1540	*	66	0	0	1.14e-64	0	3.74869	-1.43291	AC011676.3, SLC45A4	7.33954
chr6	75085012	75086552	1541	*	86	0	0	4.86e-69	0	-4.3896	-2.44758	COL12A1	7.34019
chr17	6455017	6456557	1541	*	105	0	0	5.87e-71	0	4.67444	1.46768	PITPNM3	7.34019
chr11	63919619	63921160	1542	*	72	0	0	1.76e-41	0	4.30454	2.62548	intergenic	7.34084
chr13	110511630	110513172	1543	*	109	0	0	1.44e-64	0	5.62796	1.46948	COL4A2	7.34148
chr1	19337781	19339323	1543	*	82	0	0	1.72e-55	0	5.37203	3.30169	CAPZB	7.34148
chr3	195102736	195104280	1545	*	50	0	0	3.55e-75	0	5.30047	1.16596	XXYLT1	7.34278
chr6	167705292	167706837	1546	*	95	0	0	4.7e-68	0	-5.7283	-1.79866	intergenic	7.34343
chr10	3330645	3332190	1546	*	93	0	0	2.56e-82	0	7.67155	1.06543	intergenic	7.34343
chr3	9301298	9302843	1546	*	56	0	0	2.94e-72	0	5.19264	1.84349	SRGAP3, AC026191.1	7.34343
chr5	116360453	116361999	1547	*	95	0	0	2.07e-30	0	4.13588	3.65228	COMMD10	7.34407
chr14	105900582	105902129	1548	*	50	0	0	1.69e-23	0	-2.79485	-1.34354	IGHD1-14, IGHD6-13	7.34472
chr17	38840237	38841784	1548	*	73	0	0	7.68e-25	0	2.00194	1.50751	C17orf98	7.34472
chr1	53275625	53277172	1548	*	179	0	0	7.53e-45	0	3.69049	2.66766	LRP8	7.34472
chr20	3731447	3732996	1550	*	87	0	0	1.27e-52	0	3.13906	1.16713	HSPA12B	7.34601
chr6	149484059	149485608	1550	*	53	0	0	1.51e-72	0	6.32999	1.87351	ZC3H12D	7.34601
chr13	112637147	112638696	1550	*	80	0	0	1.03e-72	0	6.24894	2.2548	intergenic	7.34601
chr5	1037737	1039287	1551	*	80	0	0	2.41e-51	0	2.85085	1.0057	NKD2	7.34666
chr22	37696021	37697571	1551	*	87	0	0	7.24e-34	0	3.15384	1.0745	Z83844.1, TRIOBP	7.34666
chr4	7965504	7967054	1551	*	91	0	0	8.92e-52	0	4.78265	1.07713	ABLIM2	7.34666
chr7	105637900	105639450	1551	*	59	0	0	3.53e-46	0	-4.77929	1.87116	ATXN7L1	7.34666
chr2	234998367	234999917	1551	*	62	0	0	5e-49	0	5.01545	2.56537	SH3BP4	7.34666
chr11	75424244	75425794	1551	*	83	0	0	2.89e-60	0	4.02143	2.59023	KLHL35	7.34666
chr19	14085340	14086890	1551	*	109	0	0	4.27e-67	0	5.96315	4.28793	C19orf67	7.34666
chr11	17546649	17548200	1552	*	60	0	0	4.73e-52	0	3.15244	1.16299	OTOG	7.3473
chr20	31637521	31639072	1552	*	75	0	0	6.31e-44	0	3.15024	1.876	COX4I2	7.3473
chr6	163629738	163631290	1553	*	136	0	0	1.16e-48	0	3.02015	1.25722	intergenic	7.34794
chr21	45426440	45427993	1554	*	74	0	0	3.09e-80	0	8.68992	3.96151	COL18A1	7.34859
chr3	72176589	72178143	1555	*	68	0	0	8.06e-91	0	-7.06941	-4.07938	LINC00870, LINC00877	7.34923
chr10	97366000	97367554	1555	*	59	0	0	3.02e-68	0	6.84589	2.47089	RRP12	7.34923
chr7	44057363	44058918	1556	*	67	0	0	5.93e-50	0	-4.12603	-1.57744	DBNL	7.34987
chr21	44893403	44894959	1557	*	53	0	0	6.18e-56	0	4.12636	1.58844	ITGB2	7.35052
chr19	4390568	4392125	1558	*	79	0	0	2.79e-59	0	5.62303	2.65719	SH3GL1	7.35116
chr7	2129365	2130923	1559	*	61	0	0	3.66e-58	0	4.56189	1.66824	MAD1L1, AC069288.1	7.3518
chr9	120893608	120895166	1559	*	82	0	0	1.69e-73	0	5.47755	2.89445	PHF19	7.3518
chr14	103879499	103881058	1560	*	68	0	0	5.35e-101	0	-8.80005	-1.75999	AL132712.2, AL132712.1	7.35244
chr12	122020699	122022258	1560	*	164	0	0	3.34e-65	0	4.36575	1.12501	BCL7A	7.35244
chr13	114099263	114100824	1562	*	59	0	0	2.88e-57	0	6.21642	4.20431	RASA3	7.35372
chr8	11853334	11854895	1562	*	76	0	0	1.16e-78	0	7.04391	4.61457	CTSB	7.35372
chr14	95360168	95361730	1563	*	101	0	0	2.83e-32	0	3.25454	1.34207	intergenic	7.35436
chr13	20390658	20392220	1563	*	113	0	0	5.8e-78	0	7.33843	1.74468	intergenic	7.35436
chr2	9392215	9393777	1563	*	52	0	0	1.59e-59	0	5.66394	2.19081	ASAP2	7.35436
chr19	51097695	51099258	1564	*	120	0	0	6.8e-16	0	2.4066	1.00106	CTU1	7.355
chr21	36428854	36430417	1564	*	52	0	0	3.2e-60	0	4.93914	1.49502	AP000695.1	7.355
chr13	20720762	20722325	1564	*	158	0	0	3.38e-67	0	5.21374	2.10019	IL17D	7.355
chr17	9162132	9163696	1565	*	59	0	0	9.28e-43	0	-4.72484	-2.91729	NTN1	7.35564
chr10	45426773	45428338	1566	*	105	0	0	1.28e-18	0	2.47342	1.24549	ALOX5	7.35628
chr17	82344337	82345903	1567	*	69	0	5.43e-298	1.97e-64	0	5.54408	1.06702	intergenic	7.35692
chr1	156160022	156161588	1567	*	69	0	0	1.33e-67	0	6.06177	1.21213	SEMA4A	7.35692
chr11	69653529	69655096	1568	*	140	0	0	3.37e-50	0	-4.53334	-1.5573	CCND1, LTO1	7.35756
chr21	37674120	37675687	1568	*	78	0	0	1e-80	0	7.68378	1.28816	KCNJ6	7.35756
chr11	44519913	44521480	1568	*	82	0	0	7.45e-75	0	5.67056	4.44954	intergenic	7.35756
chr17	45240490	45242059	1570	*	147	0	0	5.9e-32	0	4.21535	3.36619	FMNL1, AC008105.1	7.35883
chr12	109580537	109582108	1572	*	71	0	0	2.4e-50	0	-4.27904	-1.88307	MVK	7.3601
chr17	80941730	80943301	1572	*	93	0	0	3.55e-44	0	-4.60298	-1.02469	RPTOR, AC127496.3	7.3601
chr1	116167147	116168718	1572	*	155	0	0	1.29e-70	0	5.71283	1.53189	intergenic	7.3601
chr7	135748604	135750175	1572	*	52	0	0	1.84e-63	0	5.24721	2.67605	FAM180A	7.3601
chr17	80937745	80939318	1574	*	67	0	0	1.15e-75	0	-7.66369	-2.45736	RPTOR	7.36138
chr7	75881247	75882820	1574	*	64	0	0	2.02e-35	0	-3.03045	-1.2072	RHBDD2	7.36138
chr4	73981377	73982950	1574	*	68	0	0	7.58e-50	0	3.21039	1.45056	PF4	7.36138
chr12	560288	561861	1574	*	59	0	0	8.75e-54	0	3.50081	1.47714	B4GALNT3	7.36138
chr11	61007354	61008927	1574	*	216	0	0	4.45e-65	0	5.06269	2.11435	CD6	7.36138
chr11	126159725	126161298	1574	*	53	0	0	6.68e-74	0	7.25789	3.45184	AP001893.3	7.36138
chr7	915414	916988	1575	*	72	0	0	5.32e-82	0	5.44408	1.52153	ADAP1, COX19	7.36201
chr15	73997945	73999520	1576	*	72	0	0	1.27e-30	0	-2.77304	-1.03613	PML	7.36265
chr7	149815936	149817511	1576	*	50	0	0	3.94e-57	0	4.53067	1.67443	SSPOP	7.36265
chr8	142987986	142989561	1576	*	66	0	0	1.04e-73	0	7.18516	2.95086	LY6E-DT	7.36265
chr12	132366484	132368060	1577	*	65	0	0	2.93e-39	0	-3.82817	-1.74422	intergenic	7.36328
chr2	239380209	239381785	1577	*	66	0	0	2.29e-25	0	-3.45432	-1.17375	HDAC4	7.36328
chr16	89071336	89072912	1577	*	86	0	0	4.08e-74	0	5.79048	4.04588	intergenic	7.36328
chr22	37924879	37926457	1579	*	58	0	0	1.94e-70	0	6.95973	1.31762	MICALL1	7.36455
chr8	11807720	11809301	1582	*	121	0	0	2.1e-43	0	3.53097	1.29127	FDFT1	7.36645
chr11	2287085	2288667	1583	*	55	0	0	1.37e-77	0	-6.80702	-1.23321	intergenic	7.36708
chr20	17619747	17621329	1583	*	69	0	0	6.15e-66	0	5.19391	1.41317	RRBP1	7.36708
chr19	13835877	13837460	1584	*	50	0	0	1.92e-57	0	4.67773	1.98709	AC020916.1, MIR24-2, MIR27A, MIR23A	7.36771
chr9	136155088	136156673	1586	*	92	0	0	1.35e-39	0	-4.62095	-1.4946	intergenic	7.36897
chr7	94393369	94394954	1586	*	79	0	0	4.73e-65	0	5.15643	1.75004	COL1A2, AC002074.1	7.36897
chr16	29230814	29232399	1586	*	57	0	0	1.05e-30	0	3.76635	2.46513	AC009093.11, AC009093.10	7.36897
chr1	1763769	1765355	1587	*	61	0	0	2.16e-44	0	-4.26927	-1.59685	NADK	7.3696
chr19	19636735	19638321	1587	*	155	0	0	8.54e-50	0	4.41556	2.68561	GMIP	7.3696
chr15	40238753	40240340	1588	*	106	0	0	1.88e-29	0	3.71011	1.01121	PAK6, BUB1B-PAK6	7.37023
chr4	76585518	76587105	1588	*	92	0	0	3.28e-32	0	2.60779	1.02715	SHROOM3	7.37023
chr11	2861642	2863230	1589	*	134	0	0	4.11e-64	0	7.02983	1.04475	intergenic	7.37086
chr13	20414563	20416151	1589	*	192	0	0	1.86e-64	0	4.85513	1.70685	CRYL1	7.37086
chr10	131616216	131617805	1590	*	60	0	0	3.84e-36	0	2.6166	1.26	intergenic	7.37149
chr1	24535111	24536701	1591	*	54	0	0	2.02e-68	0	-5.29457	-2.3204	RCAN3, RCAN3AS	7.37212
chr15	90818353	90819943	1591	*	55	0	0	5.66e-40	0	-3.87731	-1.29469	intergenic	7.37212
chr11	69470864	69472454	1591	*	114	0	0	2.33e-60	0	4.49525	1.11652	intergenic	7.37212
chr2	96668664	96670255	1592	*	67	0	0	1.96e-72	0	5.24303	1.37267	FER1L5	7.37275
chr15	64703004	64704596	1593	*	93	0	0	5.32e-73	0	6.46252	1.1996	AC100830.1, OAZ2	7.37337
chr21	41777045	41778637	1593	*	61	0	0	6.36e-59	0	5.40242	1.83333	intergenic	7.37337
chr20	44114789	44116382	1594	*	172	0	0	4.54e-83	0	-6.79328	-3.19397	JPH2	7.374
chr16	71230274	71231867	1594	*	93	0	0	3.24e-52	0	4.71192	1.06138	HYDIN	7.374
chr22	35409726	35411320	1595	*	56	0	0	2.18e-54	0	-4.62492	-1.71498	MCM5	7.37463
chr7	6435752	6437346	1595	*	51	0	0	9.82e-51	0	-3.77266	-1.59259	DAGLB	7.37463
chr21	45899375	45900969	1595	*	69	0	0	1.47e-60	0	5.1396	1.32411	PCBP3	7.37463
chr4	76250826	76252421	1596	*	136	0	0	8.28e-70	0	6.73941	1.08639	FAM47E, FAM47E-STBD1, AC034139.1	7.37526
chr1	207817711	207819306	1596	*	94	0	0	1.77e-78	0	6.70781	1.96108	MIR29B2CHG	7.37526
chr10	119516459	119518054	1596	*	72	0	0	1.11e-55	0	5.52912	1.96975	RGS10	7.37526
chr21	36989685	36991281	1597	*	228	0	0	5.24e-49	0	5.17447	1.01938	HLCS	7.37588
chr11	130486179	130487775	1597	*	84	0	0	1.11e-72	0	5.89778	1.04776	intergenic	7.37588
chr17	73261760	73263357	1598	*	67	0	0	4.75e-48	0	-2.75524	-1.0364	CPSF4L	7.37651
chr3	142723768	142725365	1598	*	161	0	0	1.36e-71	0	5.20482	1.15885	TRPC1, AC072028.1	7.37651
chr6	21523186	21524783	1598	*	50	0	0	1.2e-59	0	3.8038	1.38086	AL512380.1	7.37651
chr5	150904273	150905870	1598	*	69	0	0	1.94e-25	0	3.00953	1.43308	ZNF300	7.37651
chr5	1331336	1332935	1600	*	62	0	0	1.67e-58	0	-5.71048	-2.12776	CLPTM1L	7.37776
chr3	46811415	46813014	1600	*	110	0	0	9.56e-76	0	5.58999	1.90122	AC109583.1, AC109583.4, PRSS44P	7.37776
chr1	3560603	3562203	1601	*	52	0	0	3.57e-54	0	3.94521	2.07718	MEGF6, MIR551A	7.37838
chr12	102949601	102951202	1602	*	87	0	0	8.26e-44	0	3.88496	1.6325	PAH	7.37901
chr8	11755501	11757103	1603	*	52	0	0	7.63e-48	0	3.22405	1.5023	GATA4	7.37963
chr12	6056487	6058090	1604	*	156	0	0	3.04e-47	0	4.70227	2.44974	VWF	7.38026
chr18	2912370	2913973	1604	*	76	0	0	2.48e-81	0	7.26022	3.0483	EMILIN2	7.38026
chr17	82301752	82303356	1605	*	51	0	0	1.2e-97	0	-7.68695	-3.11011	intergenic	7.38088
chr2	96500263	96501867	1605	*	144	0	0	1.56e-56	0	4.26279	1.91272	NEURL3	7.38088
chr13	23433295	23434900	1606	*	60	0	0	4.75e-28	0	2.40091	1.26073	SACS	7.3815
chr20	45822962	45824568	1607	*	163	0	0	9.73e-34	0	3.13336	1.02315	TNNC2	7.38212
chr12	1864042	1865648	1607	*	188	0	0	4.98e-74	0	5.12755	1.29835	CACNA2D4	7.38212
chr19	17376895	17378502	1608	*	110	0	0	2.54e-27	0	-2.52996	-1.24438	PLVAP	7.38275
chr1	6960640	6962247	1608	*	64	0	0	3.78e-48	0	-3.95056	1.72625	CAMTA1	7.38275
chr14	103737766	103739374	1609	*	81	0	0	1.01e-72	0	5.98165	1.01068	PPP1R13B	7.38337
chr1	227774006	227775614	1609	*	72	0	0	2.72e-74	0	8.32391	5.34044	SNAP47	7.38337
chr11	267915	269524	1610	*	52	0	0	1.83e-68	0	-4.88679	-2.27298	intergenic	7.38399
chr8	141237215	141238825	1611	*	66	0	0	7.49e-71	0	-6.44081	-3.07347	SLC45A4	7.38461
chr2	42763295	42764905	1611	*	64	0	3.23e-271	1.14e-32	0	-3.81208	-1.10457	OXER1	7.38461
chr4	168877521	168879131	1611	*	159	0	0	1.18e-62	0	6.04829	2.12117	PALLD, CBR4	7.38461
chr17	78040210	78041821	1612	*	87	0	0	1.05e-58	0	-4.52481	-2.88697	TNRC6C	7.38523
chr6	170146591	170148202	1612	*	60	0	0	1.76e-74	0	-5.17881	-2.62324	intergenic	7.38523
chrX	154437757	154439368	1612	*	64	0	0	8.87e-35	0	2.46527	1.10357	GDI1	7.38523
chr20	21390614	21392225	1612	*	152	0	0	4.43e-21	0	2.48804	1.13426	intergenic	7.38523
chr9	130171503	130173114	1612	*	134	0	0	3.52e-60	0	5.61592	1.37432	NCS1	7.38523
chr12	14259697	14261308	1612	*	55	0	0	1.01e-35	0	3.72496	1.52441	intergenic	7.38523
chr19	48672949	48674560	1612	*	65	0	0	1.96e-62	0	4.66318	2.94789	SEC1P, NTN5	7.38523
chr13	96994052	96995664	1613	*	112	0	0	2.39e-57	0	4.84637	1.02763	OXGR1	7.38585
chr1	15325551	15327164	1614	*	68	0	0	3.98e-48	0	-5.01023	-2.50833	FHAD1, FHAD1-AS1	7.38647
chr13	91174612	91176225	1614	*	141	0	0	6.22e-63	0	-3.78031	-1.79283	intergenic	7.38647
chr15	51828769	51830382	1614	*	159	0	0	4.41e-76	0	8.15052	1.17527	TMOD3	7.38647
chr2	3101214	3102827	1614	*	61	0	0	1.84e-75	0	5.79653	1.24247	LINC01250	7.38647
chr19	891531	893144	1614	*	144	0	0	1.1e-27	0	3.86115	1.91057	MED16	7.38647
chr8	1901631	1903245	1615	*	56	0	0	3.72e-46	0	-4.51853	-1.89265	AC019257.8, ARHGEF10	7.38709
chr22	35322254	35323868	1615	*	86	0	0	6.36e-49	0	-4.02816	-1.53729	TOM1	7.38709
chr14	103708409	103710023	1615	*	58	0	0	6.05e-52	0	-5.20088	-1.0775	KLC1, XRCC3	7.38709
chr13	109727390	109729004	1615	*	52	0	0	2.14e-69	0	5.26753	1.26522	LINC00676, AL163541.1	7.38709
chr22	49351718	49353333	1616	*	53	0	0	5.16e-65	0	5.25527	1.12794	intergenic	7.38771
chr17	77907996	77909612	1617	*	54	0	0	1.06e-38	0	-4.12069	-1.85952	intergenic	7.38833
chr2	233031235	233032851	1617	*	78	0	0	2.58e-46	0	3.1501	1.0635	NEU2	7.38833
chr17	73785707	73787323	1617	*	51	0	0	7.66e-45	0	4.24264	1.57101	LINC02092, LINC00469	7.38833
chr1	41515127	41516744	1618	*	96	0	0	1.24e-73	0	5.95837	1.3582	HIVEP3	7.38895
chr20	2705098	2706717	1620	*	52	0	0	1.05e-38	0	2.61416	1.22011	EBF4	7.39018
chr11	3188137	3189757	1621	*	50	0	0	1.25e-46	0	2.69723	1.44641	AC108448.1	7.3908
chr3	169659543	169661164	1622	*	64	0	0	1.45e-33	0	2.84297	1.34146	MECOM	7.39142
chr8	23540484	23542105	1622	*	63	0	0	2.2e-65	0	6.11661	4.07531	SLC25A37	7.39142
chr5	1671837	1673459	1623	*	99	0	0	3.82e-63	0	5.03898	1.86811	intergenic	7.39203
chr19	3963357	3964979	1623	*	78	0	0	1.87e-67	0	6.049	2.03855	DAPK3	7.39203
chr1	21573617	21575240	1624	*	86	0	0	8.76e-79	0	-5.69696	-1.30234	ALPL	7.39265
chr2	9102565	9104188	1624	*	78	0	0	1.01e-61	0	6.24794	3.72846	AC093904.2	7.39265
chr20	32276363	32277987	1625	*	83	0	0	8.38e-73	0	6.66737	1.02867	KIF3B, AL121897.1	7.39326
chr5	135465290	135466914	1625	*	82	0	0	1.88e-54	0	4.28394	1.23681	intergenic	7.39326
chr9	1042201	1043825	1625	*	139	0	0	9.83e-42	0	4.45262	1.40519	AL358976.1	7.39326
chr2	85693750	85695376	1627	*	60	0	0	1.66e-66	0	4.16419	1.0502	GNLY	7.39449
chr4	39770059	39771685	1627	*	142	0	0	1.19e-79	0	7.07127	1.49802	UBE2K, ZBTB12BP	7.39449
chr17	76871328	76872954	1627	*	53	0	0	3.47e-71	0	6.31892	2.43198	MGAT5B	7.39449
chr11	70410407	70412034	1628	*	105	0	0	3.06e-69	0	-5.65514	-1.08064	CTTN	7.39511
chr16	88076317	88077944	1628	*	152	0	0	3.04e-64	0	5.99937	1.22163	BANP	7.39511
chr17	20085362	20086989	1628	*	54	0	0	6.55e-75	0	7.7164	1.99494	SPECC1	7.39511
chr2	74647255	74648883	1629	*	134	0	0	6.64e-43	0	3.05767	1.49289	M1AP	7.39572
chr8	37330992	37332621	1630	*	50	0	1.32e-244	6.03e-31	0	-2.94373	-1.13335	AC091182.1	7.39634
chr1	18632834	18634463	1630	*	137	0	0	5.27e-42	0	4.56195	1.1256	PAX7	7.39634
chr6	168101201	168102830	1630	*	177	0	0	1.59e-33	0	3.37499	1.46354	FRMD1	7.39634
chr12	132432768	132434400	1633	*	118	0	0	6e-50	0	-5.5541	-2.26893	intergenic	7.39817
chr12	125142086	125143718	1633	*	50	0	0	1.92e-59	0	4.04685	1.09335	AACS	7.39817
chr13	21325943	21327575	1633	*	92	0	0	7.57e-41	0	4.39673	3.18835	LINC00539	7.39817
chr6	170224781	170226415	1635	*	64	0	0	1.09e-79	0	-6.63831	-3.19832	intergenic	7.3994
chr11	128903818	128905452	1635	*	59	0	0	3.47e-42	0	3.20907	1.05159	KCNJ5, C11orf45	7.3994
chr22	23401846	23403480	1635	*	137	0	0	1.75e-75	0	6.16469	1.99591	ZDHHC8P1	7.3994
chr16	1088301	1089936	1636	*	78	0	0	1.34e-36	0	-2.89265	-1.33452	C1QTNF8	7.40001
chr17	55263652	55265287	1636	*	71	0	0	1.02e-41	0	5.2216	1.50677	HLF	7.40001
chr7	1979972	1981608	1637	*	104	0	0	5.11e-53	0	-5.56461	-2.23816	MAD1L1, AC069288.1	7.40062
chr5	132001952	132003588	1637	*	50	0	0	1.32e-59	0	4.21606	2.52575	AC034228.3, ACSL6	7.40062
chr7	5487028	5488665	1638	*	78	0	0	1.34e-31	0	-3.87011	-1.66761	FBXL18	7.40123
chr19	21483267	21484904	1638	*	120	0	0	4.31e-43	0	4.44166	1.22307	AC010615.4, LINC00664	7.40123
chr2	120710235	120711872	1638	*	52	0	0	2.61e-44	0	3.03718	1.72095	AC018866.1	7.40123
chr19	14265463	14267100	1638	*	57	0	0	1.03e-35	0	3.95679	3.11491	AC011509.2	7.40123
chr18	25348262	25349900	1639	*	74	0	1.32e-307	2.7e-57	0	5.05505	1.06211	ZNF521	7.40184
chr17	3529065	3530703	1639	*	59	0	0	5.07e-69	0	6.36676	4.52954	TRPV3	7.40184
chr5	177356737	177358376	1640	*	58	0	0	4.46e-61	0	-4.99984	-2.93988	RGS14	7.40245
chr2	24174351	24175990	1640	*	186	0	0	2.03e-34	0	2.58888	1.22091	AC008073.3, FAM228A, AC008073.2	7.40245
chr10	97164123	97165762	1640	*	66	0	0	2.2e-81	0	4.73059	1.91723	SLIT1, ARHGAP19-SLIT1	7.40245
chr10	132517460	132519099	1640	*	75	0	0	3.04e-51	0	5.0243	2.2044	AL451069.1	7.40245
chr16	84293608	84295249	1642	*	89	0	0	7.69e-43	0	-3.28334	-1.17693	WFDC1	7.40367
chr9	136335907	136337548	1642	*	88	0	0	1.79e-72	0	6.37148	1.94955	GPSM1	7.40367
chr12	110919343	110920984	1642	*	52	0	0	7.67e-79	0	8.2263	2.91395	MYL2	7.40367
chr17	3004296	3005938	1643	*	90	0	0	1.15e-56	0	5.52844	1.78748	RAP1GAP2	7.40428
chr10	129556517	129558160	1644	*	71	0	0	7.28e-67	0	6.66647	1.94978	MGMT	7.40489
chr12	30200098	30201742	1645	*	105	0	0	5.27e-38	0	3.51424	1.10215	AC023511.1	7.4055
chr13	30153087	30154731	1645	*	92	0	0	1.9e-56	0	4.91946	1.83387	LINC00385, LINC00384	7.4055
chr1	32768885	32770529	1645	*	66	0	0	6.21e-77	0	8.62497	6.03422	KIAA1522	7.4055
chr16	2686030	2687675	1646	*	60	0	0	5.96e-39	0	-3.72788	-2.70839	KCTD5	7.4061
chr16	346135	347780	1646	*	97	0	0	1.33e-75	0	6.00009	1.23372	AXIN1	7.4061
chr5	131944594	131946239	1646	*	126	0	0	2.16e-33	0	2.49423	1.4096	AC034228.2, MEIKIN, AC034228.3	7.4061
chr1	2417141	2418786	1646	*	50	0	0	3.93e-65	0	5.29444	1.50618	intergenic	7.4061
chr22	38110581	38112226	1646	*	77	0	0	2.25e-37	0	3.57469	1.97334	BAIAP2L2, PLA2G6	7.4061
chr14	54773445	54775091	1647	*	60	0	0	5.01e-63	0	3.66346	2.05109	SAMD4A	7.40671
chr2	219381489	219383136	1648	*	56	0	0	8.46e-68	0	5.57689	1.0782	DNPEP	7.40732
chr22	46612959	46614607	1649	*	61	0	0	5.76e-69	0	-6.15995	-1.25405	GRAMD4	7.40792
chr7	2000221	2001870	1650	*	95	0	0	2.42e-57	0	5.52644	1.4657	MAD1L1, AC069288.1	7.40853
chr8	42207061	42208710	1650	*	63	0	0	4.42e-70	0	7.38096	3.29185	PLAT	7.40853
chr2	241551424	241553073	1650	*	55	0	0	1.53e-82	0	8.2229	5.69927	BOK, BOK-AS1	7.40853
chr7	155997027	155998677	1651	*	109	0	0	2.7e-79	0	-7.20954	-3.67684	intergenic	7.40914
chr10	79385471	79387121	1651	*	51	0	0	4e-42	0	2.93444	1.89609	AL133481.1, ZCCHC24	7.40914
chr3	58164251	58165902	1652	*	59	0	0	2.23e-63	0	5.52276	1.22941	FLNB, FLNB-AS1	7.40974
chr1	6044840	6046491	1652	*	84	0	0	5.73e-49	0	3.74924	1.37022	KCNAB2	7.40974
chrX	618862	620514	1653	*	162	0	0	3.48e-51	0	-4.41197	-2.71306	intergenic	7.41035
chr16	352267	353919	1653	*	130	0	0	1.01e-34	0	3.04067	1.07862	AXIN1	7.41035
chr6	138794823	138796475	1653	*	104	0	0	5e-51	0	4.45611	1.43062	ECT2L	7.41035
chr1	157193920	157195572	1653	*	149	0	0	2.83e-49	0	3.68933	2.01296	intergenic	7.41035
chr10	132404886	132406538	1653	*	274	0	0	9.04e-79	0	7.66264	2.4248	PWWP2B	7.41035
chr16	88523466	88525119	1654	*	74	0	0	5.29e-40	0	-3.93496	-1.75837	ZFPM1, AC116552.1	7.41095
chr1	106079930	106081583	1654	*	96	0	0	3.23e-31	0	2.27552	1.27207	AL355306.2, AL355306.1	7.41095
chr17	76000150	76001803	1654	*	91	0	0	1.67e-42	0	3.58199	1.42434	TEN1-CDK3, TEN1, CDK3	7.41095
chr19	47544486	47546140	1655	*	214	0	0	7.03e-50	0	-3.38378	-1.24389	ZNF541	7.41156
chr17	31915964	31917618	1655	*	154	0	0	2.32e-35	0	2.92439	1.89798	intergenic	7.41156
chr13	113183789	113185444	1656	*	64	0	0	3.35e-46	0	-3.53524	-1.80567	PCID2	7.41216
chr18	8366907	8368562	1656	*	116	0	0	2.52e-53	0	3.77402	1.02453	PTPRM, AP001094.3	7.41216
chr19	39307083	39308739	1657	*	291	0	0	1.01e-33	0	3.94842	1.45133	LRFN1	7.41276
chr1	3069788	3071445	1658	*	305	0	0	2.39e-58	0	5.33971	1.50773	PRDM16	7.41337
chr19	8490114	8491772	1659	*	98	0	0	1.09e-57	0	-5.23179	-2.24541	PRAM1	7.41397
chr6	87151542	87153200	1659	*	195	0	0	1.44e-68	0	5.52089	1.13418	ZNF292, AL139274.2	7.41397
chr2	1636813	1638471	1659	*	51	0	0	2.13e-69	0	4.02533	1.15903	PXDN	7.41397
chr13	108214421	108216079	1659	*	86	0	0	7.65e-38	0	4.36922	1.62185	LIG4	7.41397
chr14	106843817	106845476	1660	*	62	0	0	3.15e-22	0	-2.97532	-1.16357	intergenic	7.41457
chr6	26102431	26104091	1661	*	55	0	3.66e-195	1.54e-39	0	4.23878	1.00863	H4C3	7.41518
chr5	124735158	124736818	1661	*	59	0	0	5.62e-55	0	-4.52812	1.57323	ZNF608, AC113398.2	7.41518
chr11	64202662	64204323	1662	*	80	0	0	2.61e-44	0	-4.08726	-1.65151	STIP1	7.41578
chr7	158569217	158570878	1662	*	276	0	0	1.76e-75	0	7.73355	1.40193	PTPRN2	7.41578
chr13	99864689	99866350	1662	*	61	0	0	6.59e-77	0	4.57534	1.83884	CLYBL, AL137139.2	7.41578
chr5	3393660	3395322	1663	*	58	0	0	2.68e-43	0	-4.50033	-3.0857	LINC01019	7.41638
chr2	239230462	239232124	1663	*	92	0	0	1.88e-58	0	-4.62656	-2.91139	HDAC4	7.41638
chr10	44310226	44311888	1663	*	136	0	0	1.31e-66	0	3.56119	1.05937	AL137026.3	7.41638
chr14	23154270	23155932	1663	*	76	0	0	4.32e-64	0	-5.14428	1.15087	SLC7A8	7.41638
chr19	38303841	38305503	1663	*	90	0	0	2.59e-28	0	3.8757	2.04413	AC011479.1, C19orf33, YIF1B	7.41638
chr2	178531123	178532786	1664	*	74	0	0	1.99e-26	0	-3.84866	-1.63119	TTN-AS1, TTN	7.41698
chr12	122948637	122950300	1664	*	89	0	0	5.99e-68	0	6.36504	1.65406	ABCB9	7.41698
chr21	45515096	45516759	1664	*	111	0	0	9.13e-80	0	6.67668	1.77379	SLC19A1	7.41698
chr1	206909040	206910704	1665	*	146	0	0	3.5e-39	0	4.10257	1.01339	FCMR	7.41758
chr21	42021167	42022831	1665	*	72	0	0	4.35e-74	0	4.57396	1.63769	ZNF295-AS1	7.41758
chr19	2524016	2525680	1665	*	68	0	0	3.3e-63	0	6.58435	4.34607	GNG7	7.41758
chr21	42836523	42838188	1666	*	95	0	0	1.69e-49	0	3.17334	1.11218	intergenic	7.41818
chr1	182952507	182954173	1667	*	189	0	0	3.69e-48	0	4.14996	1.01464	SHCBP1L	7.41878
chr22	21013821	21015487	1667	*	149	0	0	5.68e-59	0	4.96228	1.11741	P2RX6, TUBA3FP, AC002472.3	7.41878
chr9	133553546	133555213	1668	*	54	0	0	7.38e-51	0	3.14521	1.25693	ADAMTSL2	7.41938
chr16	88754565	88756232	1668	*	103	0	0	7.53e-76	0	7.37008	4.03256	PIEZO1	7.41938
chr14	28758675	28760343	1669	*	110	0	0	3.51e-54	0	5.53538	3.76489	FOXG1-AS1	7.41998
chr9	134935447	134937116	1670	*	53	0	0	3.81e-64	0	-5.71304	-1.63752	AL353611.1	7.42058
chr7	604544	606213	1670	*	150	0	0	8.48e-72	0	-5.56824	-1.259	PRKAR1B-AS1, PRKAR1B	7.42058
chr17	80750327	80751996	1670	*	66	0	0	3.67e-55	0	5.36721	1.86364	RPTOR	7.42058
chr16	1654608	1656278	1671	*	128	0	0	2.98e-56	0	-3.859	-1.04384	CRAMP1, AL031708.1	7.42118
chr2	237590240	237591911	1672	*	70	0	0	2.65e-60	0	5.93696	3.46766	AC104667.2, RAB17	7.42178
chr6	168384460	168386132	1673	*	65	0	0	3.51e-41	0	-3.37111	-1.6422	intergenic	7.42237
chr16	57478873	57480545	1673	*	68	0	0	1.43e-64	0	6.48171	1.837	DOK4	7.42237
chr1	245614751	245616423	1673	*	51	0	0	1.13e-78	0	8.16009	3.33579	KIF26B, AC104462.2	7.42237
chr16	69741474	69743147	1674	*	74	0	0	1.02e-26	0	2.82968	1.26747	AC092115.3, NOB1	7.42297
chr3	157542132	157543805	1674	*	118	0	0	4.07e-45	0	3.64454	1.4556	SLC66A1L	7.42297
chr1	3460173	3461846	1674	*	62	0	0	3.21e-48	0	3.75704	1.92336	ARHGEF16	7.42297
chr2	317135	318808	1674	*	74	0	0	3.15e-71	0	7.0539	3.46201	LINC01865	7.42297
chr1	33306430	33308104	1675	*	203	0	0	5.79e-49	0	3.70363	1.00297	AL513327.1, A3GALT2	7.42357
chr17	7548483	7550157	1675	*	106	0	0	3.93e-44	0	4.13165	1.49495	TNFSF12, TNFSF12-TNFSF13	7.42357
chr22	39456178	39457854	1677	*	109	0	0	5.04e-58	0	5.33394	1.06555	MGAT3	7.42476
chr5	154690537	154692213	1677	*	100	0	0	9.84e-44	0	4.61151	1.15411	intergenic	7.42476
chr10	27251308	27252984	1677	*	109	0	0	1.96e-59	0	5.20001	1.44536	LRRC37A6P	7.42476
chr5	139377392	139379068	1677	*	104	0	0	3.67e-72	0	-5.29081	1.60264	SLC23A1	7.42476
chr11	64887618	64889294	1677	*	87	0	0	2.34e-82	0	7.82731	1.70726	EHD1	7.42476
chr18	31723472	31725148	1677	*	71	0	0	9.65e-72	0	7.61769	1.81159	LRRC37A7P	7.42476
chr10	81876315	81877992	1678	*	53	0	1.31e-242	1.37e-39	0	3.70044	1.0428	NRG3	7.42536
chr2	128321463	128323140	1678	*	156	0	0	7.63e-48	0	4.99136	1.21814	intergenic	7.42536
chr7	96992011	96993689	1679	*	91	0	0	8.81e-48	0	5.23637	3.90077	DLX6-AS1	7.42595
chr14	76309856	76311535	1680	*	52	0	0	3.56e-47	0	3.56465	1.54652	ESRRB, AC016526.1	7.42655
chr1	209804948	209806628	1681	*	97	0	0	6.16e-27	0	3.87296	1.09532	IRF6	7.42714
chr5	181193977	181195657	1681	*	130	0	0	1.44e-43	0	3.40011	1.63727	AC008443.4, TRIM7-AS1, TRIM7	7.42714
chr21	42640911	42642591	1681	*	55	0	0	5.76e-62	0	4.76488	2.42125	intergenic	7.42714
chr21	43740079	43741760	1682	*	108	0	0	2.85e-19	0	2.95989	1.43309	PDXK	7.42774
chr9	130932041	130933723	1683	*	70	0	0	2.22e-46	0	4.19197	1.40303	FIBCD1	7.42833
chr17	81063357	81065039	1683	*	64	0	0	4.48e-67	0	5.63217	3.51344	BAIAP2	7.42833
chr17	49034916	49036598	1683	*	67	0	0	7.91e-63	0	5.81844	3.65798	IGF2BP1, RNU6-826P	7.42833
chr6	170221362	170223045	1684	*	110	0	0	1.26e-77	0	-6.85335	-1.86982	intergenic	7.42893
chr22	25740854	25742537	1684	*	71	0	0	1.91e-65	0	4.0769	1.18193	MYO18B	7.42893
chr2	1624755	1626438	1684	*	76	0	0	1.97e-68	0	4.77495	1.98477	AC144450.1	7.42893
chr19	2575532	2577215	1684	*	59	0	0	1.49e-68	0	5.87308	3.56778	GNG7	7.42893
chr3	13621877	13623561	1685	*	78	0	0	3.09e-35	0	4.12493	1.46243	FBLN2	7.42952
chr7	128454628	128456313	1686	*	161	0	0	1.1e-69	0	6.66015	1.56862	AC010655.4, HILPDA, AC010655.2	7.43011
chr11	44466569	44468254	1686	*	61	0	0	6.51e-77	0	7.15131	4.5637	intergenic	7.43011
chr16	86878458	86880144	1687	*	75	0	0	4.85e-76	0	-6.53421	-3.18861	intergenic	7.43071
chr19	12720844	12722530	1687	*	138	0	0	5.18e-39	0	3.31769	1.50903	TNPO2	7.43071
chr7	103148389	103150077	1689	*	200	0	0	2.57e-72	0	6.96943	1.05768	NAPEPLD	7.43189
chr2	42053481	42055169	1689	*	71	0	0	3.22e-75	0	5.05801	2.01498	PKDCC	7.43189
chr7	5217977	5219666	1690	*	60	0	0	2.17e-52	0	-3.99557	-2.14791	WIPI2	7.43248
chr13	109869585	109871274	1690	*	68	0	0	7.97e-80	0	7.08758	1.67553	intergenic	7.43248
chr6	88046636	88048326	1691	*	177	0	0	2.38e-49	0	3.32568	1.26138	SPACA1, AL136096.1	7.43308
chr7	749149	750840	1692	*	51	0	0	1.46e-32	0	-2.8007	-1.28271	DNAAF5	7.43367
chr22	21656718	21658409	1692	*	214	0	0	7.55e-70	0	7.09713	1.04017	AP000553.1, AP000553.5	7.43367
chr2	3447734	3449425	1692	*	116	0	0	1.25e-31	0	2.62124	1.13671	TRAPPC12	7.43367
chr3	194312730	194314421	1692	*	56	0	0	1.26e-70	0	5.92256	2.08825	LINC00887	7.43367
chr13	112702448	112704141	1694	*	77	0	0	1.52e-89	0	-6.63736	-2.63693	ATP11A	7.43485
chr19	6228961	6230654	1694	*	87	0	0	1.53e-38	0	-3.48811	-1.12062	MLLT1	7.43485
chr6	31817300	31818995	1696	*	50	0	0	4.87e-81	0	-6.59535	-2.17294	HSPA1A	7.43603
chr1	204196142	204197837	1696	*	55	0	0	1.98e-40	0	4.28853	1.46836	KISS1	7.43603
chr7	151735918	151737613	1696	*	85	0	0	3.28e-46	0	4.18367	2.41124	PRKAG2	7.43603
chr1	16206388	16208084	1697	*	190	0	0	1.64e-67	0	7.76743	2.08049	ARHGEF19	7.43662
chr16	72786781	72788478	1698	*	65	0	0	7.51e-72	0	-5.60981	-3.12302	AC004943.2, ZFHX3	7.43721
chr19	38975128	38976825	1698	*	157	0	0	1.64e-53	0	5.0371	1.64696	AC011455.8, FBXO17	7.43721
chr11	3146165	3147865	1701	*	101	0	0	1.16e-74	0	5.64912	1.03669	OSBPL5	7.43897
chr21	43865620	43867320	1701	*	117	0	0	1.39e-33	0	4.27023	1.61485	AGPAT3	7.43897
chr11	64858618	64860319	1702	*	66	0	0	6.62e-31	0	-3.85955	-1.33153	EHD1	7.43956
chr10	14604053	14605754	1702	*	60	0	0	1e-68	0	5.34549	1.66392	FAM107B	7.43956
chr7	149820429	149822130	1702	*	76	0	0	2.14e-74	0	4.68224	2.35084	SSPOP	7.43956
chr9	135243126	135244828	1703	*	91	0	0	2.78e-40	0	-5.00195	-1.00456	intergenic	7.44015
chr16	29613456	29615158	1703	*	98	0	0	1.02e-77	0	8.00219	2.04598	AC133555.6, SLC7A5P1	7.44015
chr19	10513397	10515099	1703	*	296	0	0	5.56e-59	0	4.22857	2.7926	S1PR5	7.44015
chr8	11861151	11862854	1704	*	50	0	0	1.4e-67	0	5.90852	1.44394	CTSB	7.44073
chr6	34465361	34467065	1705	*	140	0	0	7.09e-56	0	4.90585	1.40075	PACSIN1	7.44132
chr1	3072520	3074224	1705	*	204	0	0	3.89e-76	0	6.31542	2.60347	PRDM16	7.44132
chr10	614186	615890	1705	*	53	0	0	7.08e-76	0	7.28799	3.63831	DIP2C	7.44132
chr16	56642276	56643981	1706	*	106	0	0	8.36e-40	0	2.56575	1.12516	MT1DP	7.44191
chr12	12070726	12072432	1707	*	52	0	0	2.54e-50	0	-3.75444	-1.07309	BCL2L14	7.44249
chr17	81483340	81485046	1707	*	194	0	0	3.36e-53	0	3.31598	1.11292	intergenic	7.44249
chr20	3785614	3787320	1707	*	187	0	0	3.56e-34	0	3.35616	1.38939	CDC25B, CENPB	7.44249
chr19	48629326	48631033	1708	*	234	0	0	3.21e-47	0	4.68739	2.04111	SPHK2, DBP	7.44308
chr19	41903320	41905028	1709	*	70	0	0	6.03e-54	0	-5.20481	-3.80683	ARHGEF1	7.44366
chr14	75469294	75471002	1709	*	61	0	0	2.06e-52	0	-4.65804	-2.03884	JDP2	7.44366
chr3	126266174	126267883	1710	*	163	0	0	1.01e-70	0	4.57901	1.05536	AC016924.1	7.44425
chr12	50081108	50082817	1710	*	85	0	0	9.21e-59	0	4.09693	2.25557	ASIC1	7.44425
chr17	43755090	43756800	1711	*	148	0	0	2.41e-41	0	2.86214	1.02847	SOST	7.44483
chr7	128910287	128911997	1711	*	119	0	0	6.31e-36	0	3.46629	1.48725	KCP	7.44483
chr9	93316886	93318597	1712	*	59	0	0	1.55e-28	0	-3.47354	-1.51076	WNK2, C9orf129	7.44542
chr16	67540054	67541765	1712	*	52	0	0	2.81e-72	0	7.53297	3.03165	RIPOR1, AC027682.5	7.44542
chr2	236580464	236582176	1713	*	61	0	0	5.19e-47	0	-4.72283	-1.89116	ACKR3	7.446
chr15	100972566	100974278	1713	*	263	0	0	4.88e-58	0	4.74438	1.09709	LRRK1	7.446
chr6	10554880	10556592	1713	*	63	0	0	1.21e-64	0	3.85071	2.44152	GCNT2	7.446
chr16	70645222	70646934	1713	*	70	0	0	3.91e-74	0	5.30791	2.68837	IL34	7.446
[truncated: 2,898 more rows]

## Sheet: DMP
Position	logFC	AveExpr	t	P.Value	adj.P.Val	B
chr16:85847917	-7.04732	-1.41061	-60.2102	6.29264e-116	2.43038e-109	254.31
chr6:42281750	-7.22683	-0.557439	-60.1714	6.98232e-116	2.43038e-109	254.207
chr15:85543921	-5.45829	-1.08646	-58.4336	7.80376e-114	1.81087e-107	249.557
chr6:128600581	-4.83305	-1.76421	-57.777	4.79415e-113	8.34365e-107	247.766
chr3:71444132	-6.46512	-0.477195	-57.6429	6.9612e-113	9.6921e-107	247.398
chr1:13731110	-5.54988	-1.39079	-57.3038	1.79446e-112	2.08203e-106	246.463
chr11:1307340	-6.56939	-1.29396	-57.1432	2.81428e-112	2.47779e-106	246.018
chr11:16815280	-6.34451	-1.12287	-57.1391	2.84742e-112	2.47779e-106	246.007
chr2:70095333	-6.03098	-1.15073	-57.0744	3.41392e-112	2.60806e-106	245.828
chr15:85543860	-6.16902	-0.792561	-57.0414	3.7464e-112	2.60806e-106	245.736
chr16:85847895	-7.19573	-1.18957	-56.8549	6.33293e-112	4.00789e-106	245.218
chr6:42281749	-7.09207	-0.678476	-56.6802	1.03714e-111	6.01673e-106	244.731
chr11:68142248	-5.91463	-1.10976	-56.5559	1.4746e-111	7.89648e-106	244.383
chr8:140598577	-6.01524	-1.3047	-56.3816	2.4178e-111	1.20225e-105	243.895
chr14:100222573	-5.40268	-1.15402	-56.2677	3.34223e-111	1.55113e-105	243.575
chr7:43648907	-6.45195	-0.909512	-56.0594	6.0515e-111	2.55022e-105	242.988
chr16:89360997	-5.62232	-1.03933	-56.0494	6.22762e-111	2.55022e-105	242.96
chr5:179793819	-5.52341	-1.40463	-56.0057	7.05579e-111	2.72883e-105	242.837
chr15:39140082	5.98854	-1.04488	55.9808	7.57536e-111	2.77558e-105	242.766
chr4:3385413	-6.21037	-0.945061	-55.9039	9.43955e-111	3.28568e-105	242.549
chr1:206558330	-7.50817	-0.339207	-55.6771	1.80895e-110	5.90176e-105	241.906
chr16:89361018	-5.21915	-1.76872	-55.6665	1.86509e-110	5.90176e-105	241.876
chr7:98218275	-5.44134	-1.23165	-55.647	1.97269e-110	5.97082e-105	241.821
chr11:16815266	-6.58232	-0.934451	-55.5654	2.49423e-110	7.23485e-105	241.589
chr5:179793796	-5.44537	-1.32829	-55.4604	3.37547e-110	9.39936e-105	241.29
chr6:136365972	-6.65866	-0.462988	-55.4302	3.68257e-110	9.86009e-105	241.204
chr3:195906942	-5.58	-1.61695	-55.4	4.018e-110	1.01832e-104	241.118
chr17:81365863	-5.59451	-1.14189	-55.3933	4.0958e-110	1.01832e-104	241.099
chr17:78775101	-6.02415	-1.43939	-55.3543	4.58449e-110	1.10052e-104	240.987
chr5:176534189	-4.53305	-2.20201	-55.2093	6.97328e-110	1.61815e-104	240.573
chr17:63435298	-6.48878	-0.573049	-55.162	7.99681e-110	1.7958e-104	240.437
chr15:85543895	-6.1339	-0.767683	-55.1185	9.06998e-110	1.92895e-104	240.313
chr1:225445189	-5.99317	-0.996829	-55.1157	9.14391e-110	1.92895e-104	240.305
chr2:8526103	-6.14768	-0.883841	-55.0364	1.15097e-109	2.28088e-104	240.077
chr4:6918385	-5.10488	-1.35915	-55.0323	1.16462e-109	2.28088e-104	240.066
chr4:40301736	-6.02951	-0.779512	-55.0249	1.18988e-109	2.28088e-104	240.045
chr1:9882496	-6.80878	-0.606585	-55.0185	1.21227e-109	2.28088e-104	240.026
chr17:63435304	-6.73427	-0.39689	-54.9677	1.40536e-109	2.57459e-104	239.88
chr1:13731047	-6.20402	-0.685671	-54.8936	1.74285e-109	3.11099e-104	239.667
chr16:85847884	-7.54159	-0.920915	-54.7036	3.03268e-109	5.27801e-104	239.12
chr8:140598559	-6.57159	-0.939939	-54.678	3.26754e-109	5.54805e-104	239.046
chr3:151328695	-5.55268	-1.08451	-54.609	3.99752e-109	6.6259e-104	238.846
chr1:13731111	-5.21976	-1.30012	-54.5591	4.62573e-109	7.48886e-104	238.702
chr10:124619427	-5.7	-1.28366	-54.5443	4.83111e-109	7.64361e-104	238.659
chr5:32193740	-7.10427	-0.88128	-54.4022	7.32474e-109	1.13314e-103	238.248
chr11:1307433	-7.37488	-0.608171	-54.3659	8.14849e-109	1.23317e-103	238.142
chr5:179793795	-5.74012	-1.47848	-54.3346	8.93342e-109	1.29649e-103	238.051
chr14:76867690	-5.38585	-1.29524	-54.3343	8.93937e-109	1.29649e-103	238.051
chr1:226664758	7.00415	0.0531707	54.3005	9.87221e-109	1.40256e-103	237.952
chr20:62603387	-5.81256	-1.63591	-54.2364	1.19196e-108	1.65957e-103	237.766
chr11:68142249	-5.64207	-0.782134	-54.2287	1.2195e-108	1.66462e-103	237.743
chr22:26479438	-5.19293	-1.42012	-54.2027	1.31638e-108	1.76231e-103	237.668
chr12:14843429	6.86183	-0.18372	54.1106	1.72668e-108	2.26798e-103	237.4
chr14:76867828	-6.21061	-0.808354	-54.1022	1.76967e-108	2.28141e-103	237.375
chr12:124006748	-4.9439	-1.48256	-53.9514	2.76192e-108	3.49585e-103	236.935
chr16:85848017	-6.85549	-1.37006	-53.9217	3.01521e-108	3.74829e-103	236.848
chr1:13731046	-6.66671	-0.629085	-53.8988	3.22641e-108	3.94048e-103	236.781
chr10:13484134	-6.1022	-0.57939	-53.8566	3.65581e-108	4.35905e-103	236.658
chr16:84898036	-6.27488	-0.490854	-53.8531	3.69437e-108	4.35905e-103	236.647
chr11:16815332	-5.85915	-0.999329	-53.797	4.36123e-108	4.95502e-103	236.483
chr2:70095447	-6.74	-0.446829	-53.7949	4.38905e-108	4.95502e-103	236.477
chr17:81366027	-5.88976	-0.751951	-53.793	4.41299e-108	4.95502e-103	236.471
chr6:163750957	-6.28171	-0.197195	-53.7562	4.92141e-108	5.43818e-103	236.363
chr13:111282243	-5.35451	0.225427	-53.7472	5.05515e-108	5.49868e-103	236.337
chr15:31264166	-6.38902	-0.541585	-53.6948	5.90526e-108	6.32455e-103	236.183
chr14:76867812	-6.55963	-1.35994	-53.6647	6.45727e-108	6.81097e-103	236.095
chr7:36724535	-5.58854	-1.24354	-53.6356	7.03948e-108	7.31425e-103	236.009
chr10:13484192	-6.24841	-1.01457	-53.5678	8.6109e-108	8.81543e-103	235.81
chr16:81559026	-5.7822	-0.781951	-53.543	9.27258e-108	9.35525e-103	235.737
chr19:3338759	-5.86402	-1.33043	-53.4861	1.09831e-107	1.09227e-102	235.569
chr3:55198634	6.86317	-0.145122	53.4632	1.17584e-107	1.14341e-102	235.502
chr6:53048645	-6.24561	-0.621463	-53.4613	1.18258e-107	1.14341e-102	235.496
chr5:176534331	-4.75207	-1.93994	-53.4417	1.25356e-107	1.18079e-102	235.438
chr10:13484152	-6.65659	-0.763537	-53.4413	1.25517e-107	1.18079e-102	235.437
chr1:13731070	-5.97744	-0.823841	-53.3883	1.46988e-107	1.36435e-102	235.281
chr4:2811814	-5.37305	-1.70165	-53.3375	1.71044e-107	1.56427e-102	235.131
chr11:16815256	-7.13024	-0.220854	-53.3337	1.73021e-107	1.56427e-102	235.12
chr3:136070537	5.95146	-0.135366	53.3213	1.79537e-107	1.60237e-102	235.083
chr15:68206047	-5.12805	-1.43329	-53.2355	2.32e-107	2.0444e-102	234.829
chr15:39140106	5.58098	-1.14866	53.22	2.42993e-107	2.1145e-102	234.784
chr5:10746979	-6.5822	-0.117439	-53.1906	2.65344e-107	2.28049e-102	234.696
chr15:31264184	-6.28695	-0.6075	-53.1851	2.69756e-107	2.29013e-102	234.68
chr12:121637662	-4.79049	-1.74878	-53.1388	3.09824e-107	2.59861e-102	234.543
chr13:77980684	6.46098	-0.0219512	53.1257	3.22284e-107	2.67094e-102	234.504
chr7:99562647	6.695	0.0222561	53.1051	3.42786e-107	2.80742e-102	234.443
chr22:46374324	-6.92049	-0.571707	-53.0862	3.628e-107	2.93679e-102	234.387
chr8:95693552	5.41146	-1.19866	53.0814	3.67986e-107	2.94217e-102	234.373
chr16:4516088	-6.0972	-0.780671	-53.0779	3.71917e-107	2.94217e-102	234.362
chr10:8366522	6.89159	0.225671	53.0267	4.3366e-107	3.39206e-102	234.21
chr5:142621483	6.3772	-0.265671	53.0068	4.60372e-107	3.56099e-102	234.151
chr10:63388593	-6.31085	-0.683963	-53.0004	4.69336e-107	3.59043e-102	234.132
chr21:42232593	-6.22305	-0.8275	-52.972	5.11033e-107	3.86692e-102	234.048
chr10:14561617	-5.86024	-0.783902	-52.9571	5.34515e-107	4.00111e-102	234.003
chr8:25252513	6.43768	0.29689	52.9025	6.29825e-107	4.6644e-102	233.841
chr1:113780594	-6.035	0.307256	-52.8961	6.42074e-107	4.70506e-102	233.822
chr1:13730864	-4.79573	-1.79104	-52.8722	6.89916e-107	5.00298e-102	233.751
chr8:140598547	-6.86817	-0.795793	-52.8673	7.00007e-107	5.02382e-102	233.736
chr2:70095477	-6.49939	-0.463963	-52.8415	7.56742e-107	5.37558e-102	233.659
chr6:136366012	-6.06317	-0.715854	-52.8238	7.98044e-107	5.61171e-102	233.607
chr7:98202577	-6.42585	-0.766951	-52.7972	8.64499e-107	6.01823e-102	233.528
chr3:55198635	6.94049	-0.110488	52.7867	8.9248e-107	6.1515e-102	233.496
chr16:85847962	-7.41244	-1.28061	-52.7769	9.19098e-107	6.27286e-102	233.467
chr1:13731137	-5.16646	-1.31445	-52.7174	1.09965e-106	7.43226e-102	233.289
chr15:31264203	-6.02817	-0.688354	-52.7121	1.1175e-106	7.48028e-102	233.273
chr9:134662243	6.33829	-0.125488	52.7072	1.13425e-106	7.52012e-102	233.259
chr7:4715742	-6.75341	-0.407805	-52.6826	1.22147e-106	8.00743e-102	233.185
chr4:184385990	-6.56024	-0.655976	-52.6792	1.23427e-106	8.00743e-102	233.175
chr1:181062943	-4.69671	-1.46348	-52.677	1.24226e-106	8.00743e-102	233.169
chr1:113931766	-6.0561	-0.792927	-52.6286	1.43802e-106	9.18424e-102	233.024
chr16:17364579	-6.15305	-0.754939	-52.6073	1.53359e-106	9.70553e-102	232.96
chr20:62603347	-6.8011	-0.889695	-52.5842	1.64445e-106	1.03134e-101	232.891
chr2:70095446	-6.60159	-0.608598	-52.578	1.67562e-106	1.03277e-101	232.872
chr12:111777943	-5.86671	-0.179817	-52.5778	1.67641e-106	1.03277e-101	232.872
chr11:16815265	-6.65451	-0.842378	-52.5604	1.76683e-106	1.07893e-101	232.82
chr7:47517272	-6.04037	0.0351829	-52.5445	1.85387e-106	1.12224e-101	232.772
chr3:195906969	-5.13341	-1.40268	-52.5218	1.98572e-106	1.19169e-101	232.704
chr8:140598570	-6.34878	-1.05915	-52.5101	2.05757e-106	1.22426e-101	232.669
chr1:147761203	6.09585	-0.516585	52.4942	2.15904e-106	1.27374e-101	232.622
chr10:13484193	-6.43268	-0.754024	-52.4778	2.26904e-106	1.32739e-101	232.572
chr1:206558261	-5.28866	-1.46482	-52.4156	2.73986e-106	1.58946e-101	232.386
chr12:121240704	-4.87768	-1.87872	-52.408	2.80337e-106	1.61287e-101	232.363
chr1:108646694	-5.7872	-0.632134	-52.3932	2.93238e-106	1.67326e-101	232.318
chr11:63952036	-4.47	-1.33927	-52.3444	3.40011e-106	1.92439e-101	232.172
chr22:46374586	-6.27268	-1.23451	-52.3358	3.4897e-106	1.95916e-101	232.146
chr1:19463346	-5.6811	-0.924939	-52.2949	3.95205e-106	2.20098e-101	232.023
chr2:8526073	-5.65049	-1.08012	-52.2825	4.10351e-106	2.2672e-101	231.986
chr13:52417136	-5.41244	0.248537	-52.2652	4.32482e-106	2.3583e-101	231.934
chr10:78148713	6.16024	0.0603659	52.2643	4.33616e-106	2.3583e-101	231.931
chr21:43812541	-4.495	-1.9814	-52.2495	4.53574e-106	2.44772e-101	231.887
chr12:121240917	-5.51061	-1.69567	-52.2408	4.65818e-106	2.49178e-101	231.86
chr1:84073493	6.33024	-0.0282927	52.2386	4.68896e-106	2.49178e-101	231.854
chr13:111282145	-5.52354	-0.736768	-52.2276	4.84804e-106	2.53757e-101	231.821
chr22:46374414	-6.2478	-0.734512	-52.2276	4.84804e-106	2.53757e-101	231.821
chr14:77591154	-6.335	-0.2675	-52.2043	5.20481e-106	2.70398e-101	231.75
chr16:4053495	-5.92659	-0.919024	-52.1981	5.30453e-106	2.73537e-101	231.732
chr7:98218263	-5.56183	-1.20348	-52.1933	5.38137e-106	2.7546e-101	231.717
chr13:44348340	6.95744	0.222378	52.1732	5.72237e-106	2.90777e-101	231.657
chr10:14561608	-5.99305	-0.585427	-52.1327	6.47187e-106	3.26479e-101	231.535
chr20:62603393	-5.79841	-1.65835	-52.1149	6.8326e-106	3.42196e-101	231.481
chr16:57801602	4.55439	-1.55159	52.1008	7.13405e-106	3.52021e-101	231.438
chr20:22791550	5.86939	0.0293293	52.1005	7.14011e-106	3.52021e-101	231.437
chr5:146732008	5.70268	-0.0381707	52.0986	7.18047e-106	3.52021e-101	231.432
chr10:50422411	-5.83585	-0.31061	-52.086	7.46294e-106	3.62363e-101	231.394
chr8:127809862	5.99293	0.0558537	52.0846	7.49552e-106	3.62363e-101	231.389
chr2:36489391	6.5472	0.153598	52.0747	7.72548e-106	3.70904e-101	231.359
chr14:55278531	-6.28622	-0.446402	-52.0565	8.16589e-106	3.89363e-101	231.304
chr11:68142151	-5.29695	-1.15165	-52.0406	8.57218e-106	4.05476e-101	231.256
chr11:16815331	-5.78537	-1.1128	-52.0387	8.62032e-106	4.05476e-101	231.251
chr1:42737392	-4.89598	-2.06872	-52.0349	8.72033e-106	4.07427e-101	231.239
chr17:28893082	-6.35146	-0.507195	-52.0322	8.79464e-106	4.0816e-101	231.231
chr12:121240755	-5.18024	-1.98829	-52.0046	9.56727e-106	4.41077e-101	231.148
chr2:19801737	6.58976	0.168293	51.9906	9.98473e-106	4.57295e-101	231.105
chr6:154247251	-6.00854	-1.34427	-51.9875	1.00797e-105	4.58625e-101	231.096
chr18:74498916	-5.2539	-1.16256	-51.9685	1.06819e-105	4.82871e-101	231.039
chr13:20476016	-6.22939	-0.363476	-51.9543	1.11543e-105	5.00974e-101	230.996
chr6:71333865	6.09378	-0.297134	51.9494	1.13233e-105	5.02763e-101	230.981
chr8:140598530	-5.94305	-1.11348	-51.949	1.13386e-105	5.02763e-101	230.979
chr20:10447272	-4.3828	-1.8514	-51.9364	1.17823e-105	5.17124e-101	230.941
chr19:6772850	-4.67549	-1.99067	-51.9356	1.1811e-105	5.17124e-101	230.939
chr15:101242832	-4.86878	-1.24634	-51.9291	1.20487e-105	5.24234e-101	230.919
chr4:67575475	-5.93049	-0.809024	-51.8803	1.39858e-105	6.02197e-101	230.772
chr14:88468251	6.49963	0.177622	51.8797	1.40136e-105	6.02197e-101	230.77
chr6:163750921	-6.01171	-0.325	-51.8747	1.42297e-105	6.07734e-101	230.755
chr22:46374355	-6.05634	-1.04049	-51.8537	1.51718e-105	6.44017e-101	230.691
chr20:62603348	-6.96488	-0.94939	-51.835	1.6066e-105	6.77839e-101	230.634
chr1:226664753	6.93732	0.055	51.7866	1.86367e-105	7.81564e-101	230.487
chr11:65916204	5.82476	-0.960305	51.7833	1.8826e-105	7.84774e-101	230.477
chr8:95693477	5.6039	-0.714756	51.7277	2.23271e-105	9.25183e-101	230.308
chr2:8526090	-5.2528	-1.4275	-51.7173	2.30498e-105	9.49476e-101	230.277
chr10:14561618	-6.12817	-0.493354	-51.7035	2.4043e-105	9.84562e-101	230.235
chr13:41614348	6.5539	-0.351829	51.6834	2.5573e-105	1.04109e-100	230.174
chr16:86827747	-6.05439	-1.10732	-51.6547	2.7932e-105	1.13052e-100	230.087
chr11:6618434	-6.26329	-1.04591	-51.6434	2.89148e-105	1.16321e-100	230.052
chr16:4516087	-6.10646	-0.679939	-51.6415	2.90898e-105	1.16321e-100	230.046
chr2:235044089	-5.87171	0.397439	-51.6385	2.93564e-105	1.16321e-100	230.037
chr3:186986062	-6.12207	-1.1964	-51.6379	2.94082e-105	1.16321e-100	230.036
chr16:11155610	6.8239	0.243537	51.6259	3.05138e-105	1.20013e-100	229.999
chr8:141266179	-6.19902	-0.727927	-51.6181	3.12574e-105	1.22247e-100	229.975
chr16:70700385	-6.33793	-0.629085	-51.609	3.21406e-105	1.24999e-100	229.948
chr17:63435282	-6.64134	-0.192866	-51.5774	3.5417e-105	1.36975e-100	229.851
chr17:63435267	-6.47829	-0.0664634	-51.5632	3.7007e-105	1.42334e-100	229.808
chr22:46374298	-6.78598	-0.598354	-51.5451	3.91184e-105	1.49628e-100	229.753
chr16:84874606	7.23756	0.148415	51.5389	3.98795e-105	1.51706e-100	229.734
chr10:27679466	5.56037	0.586159	51.5307	4.08893e-105	1.54702e-100	229.709
chr5:34687323	6.31439	0.16939	51.5209	4.21462e-105	1.58595e-100	229.679
chr18:75490092	6.62415	0.14561	51.519	4.23992e-105	1.5869e-100	229.673
chr18:54852950	-6.43793	-0.172378	-51.489	4.65037e-105	1.72673e-100	229.582
chr17:78774956	-7.03341	-0.543659	-51.4881	4.66314e-105	1.72673e-100	229.579
chr8:141266198	-5.74963	-1.18616	-51.4808	4.76789e-105	1.75618e-100	229.557
chr11:68142243	-6.05183	-0.577256	-51.4749	4.8556e-105	1.77907e-100	229.539
chr2:235044085	-5.44646	0.108598	-51.4703	4.92487e-105	1.795e-100	229.525
chr1:184867082	-6.94341	-0.553659	-51.4416	5.38043e-105	1.95083e-100	229.437
chr7:43648926	-6.32085	-0.407256	-51.4263	5.64124e-105	2.0348e-100	229.39
chr5:145996399	-6.25378	-0.294207	-51.4228	5.70121e-105	2.04583e-100	229.38
chr13:76966274	6.56305	-0.19189	51.4201	5.74977e-105	2.05267e-100	229.372
chr8:141266242	-6.39171	-1.00366	-51.4005	6.10866e-105	2.16278e-100	229.312
chr15:90594539	-5.45976	-0.682805	-51.3998	6.12034e-105	2.16278e-100	229.31
chr8:2075256	-5.17415	-1.61732	-51.397	6.17454e-105	2.17092e-100	229.301
chr4:3385535	-6.66866	-0.908476	-51.3749	6.61051e-105	2.31252e-100	229.233
chr10:124341139	-5.13305	-1.82835	-51.368	6.75192e-105	2.35018e-100	229.212
chr1:226664759	5.93037	-0.291524	51.3617	6.88488e-105	2.38454e-100	229.193
chr12:121240746	-5.47805	-1.65415	-51.354	7.05083e-105	2.42992e-100	229.169
chr16:29261799	7.34793	0.0231098	51.3473	7.19733e-105	2.46819e-100	229.149
chr17:82302423	-5.03402	-1.29823	-51.3456	7.23491e-105	2.46892e-100	229.144
chr1:226664804	6.26829	-0.102195	51.3417	7.32284e-105	2.48673e-100	229.132
chr15:90594506	-5.33939	-1.24799	-51.3195	7.84317e-105	2.6505e-100	229.064
chr17:81366009	-6.13915	-0.787622	-51.3132	7.99767e-105	2.68966e-100	229.045
chr7:94906690	6.37512	-0.31378	51.3099	8.07823e-105	2.70369e-100	229.035
chr18:54852957	-6.415	-0.203598	-51.3036	8.23712e-105	2.74368e-100	229.015
chr6:42281801	-6.21939	-1.16348	-51.272	9.08409e-105	3.01138e-100	228.919
chr14:91400318	-5.42927	-1.16963	-51.2703	9.13035e-105	3.01237e-100	228.913
chr15:70475309	-6.40305	-0.655549	-51.2676	9.20823e-105	3.02374e-100	228.905
chr2:232315651	-6.74927	-0.851707	-51.2636	9.32086e-105	3.04635e-100	228.893
chr4:40197150	-4.19976	-1.78317	-51.2193	1.06921e-104	3.4782e-100	228.757
chr1:184867071	-5.94134	-1.08165	-51.2138	1.08747e-104	3.52113e-100	228.74
chr7:98202709	-6.34976	-0.700244	-51.2115	1.0952e-104	3.52975e-100	228.733
chr3:112653873	6.47976	0.000487805	51.2016	1.12921e-104	3.62259e-100	228.703
chr1:13731026	-6.23171	-0.635	-51.1787	1.21243e-104	3.87172e-100	228.633
chr7:4715282	-6.77256	-0.382256	-51.1662	1.26005e-104	4.00542e-100	228.594
chr20:62603404	-6.93232	-0.763963	-51.1476	1.33473e-104	4.22352e-100	228.537
chr7:130488583	6.7078	0.18378	51.1414	1.36094e-104	4.28698e-100	228.518
chr3:119418435	7.30902	0.0941463	51.1305	1.40749e-104	4.41364e-100	228.485
chr15:39140083	5.7722	-0.935976	51.1232	1.43961e-104	4.49411e-100	228.462
chr2:46067844	6.0639	0.299268	51.1191	1.4582e-104	4.53183e-100	228.45
chr15:28108032	-5.44634	-1.73232	-51.1032	1.53182e-104	4.73945e-100	228.401
chr1:84073463	6.6528	0.114451	51.09	1.59557e-104	4.91486e-100	228.36
chr19:6772800	-5.23732	-1.56988	-51.0841	1.62522e-104	4.98414e-100	228.342
chr10:45420636	-6.2678	-1.03451	-51.0542	1.78308e-104	5.42938e-100	228.25
chr17:63435281	-6.74939	-0.318354	-51.0537	1.786e-104	5.42938e-100	228.249
chr14:50846643	6.33024	0.251341	51.0328	1.90567e-104	5.76799e-100	228.185
chr1:64133230	6.00805	-0.870122	51.016	2.00744e-104	6.03384e-100	228.133
chr15:48632852	6.85098	-0.143049	51.0155	2.01084e-104	6.03384e-100	228.131
chr1:154407748	-6.07122	-0.396951	-51.0084	2.05567e-104	6.14187e-100	228.109
chr1:44810323	-5.99976	-1.06634	-51.0025	2.09387e-104	6.22927e-100	228.091
chr2:70095191	-5.95793	-1.10982	-51.0003	2.10828e-104	6.24545e-100	228.084
chr12:92075851	6.50659	-0.252683	50.9791	2.25127e-104	6.61163e-100	228.019
chr10:11163070	-6.50415	-0.381463	-50.9785	2.25592e-104	6.61163e-100	228.017
chr15:39140107	5.36146	-1.0511	50.9778	2.26038e-104	6.61163e-100	228.015
chr10:45420603	-5.53744	-1.44774	-50.969	2.32321e-104	6.76698e-100	227.988
chr1:10515896	-4.97122	-1.5061	-50.9512	2.4557e-104	7.12309e-100	227.933
chr8:121801348	6.79329	0.165671	50.945	2.503e-104	7.23015e-100	227.914
chr3:55198706	5.82671	-0.710305	50.9165	2.73529e-104	7.86849e-100	227.826
chr2:46068245	6.2461	-0.0482927	50.9085	2.80424e-104	8.03364e-100	227.802
chr9:36306814	-5.50305	-1.36433	-50.9047	2.83764e-104	8.09602e-100	227.79
chr11:1307391	-6.79341	-0.559756	-50.8935	2.93785e-104	8.34011e-100	227.756
chr5:146732014	5.95659	0.122439	50.8921	2.95066e-104	8.34011e-100	227.751
chr8:8389586	6.03329	0.112378	50.8912	2.95914e-104	8.34011e-100	227.749
chr21:42064173	-4.79841	-1.59299	-50.8858	3.00915e-104	8.44688e-100	227.732
chr3:177744871	6.21805	0.0832927	50.881	3.05444e-104	8.53958e-100	227.717
chr3:64612625	5.64927	-0.304756	50.8752	3.11073e-104	8.66216e-100	227.699
chr7:50535629	6.68732	0.1	50.8631	3.2293e-104	8.95651e-100	227.662
chr5:76547689	-5.35732	-0.88122	-50.8567	3.29452e-104	9.10114e-100	227.642
chr17:847042	-5.10207	-1.26299	-50.8549	3.31336e-104	9.11701e-100	227.637
chr3:2654867	6.03354	-0.22689	50.8429	3.43935e-104	9.4264e-100	227.6
chr4:2811815	-4.87768	-1.50677	-50.8267	3.61747e-104	9.87572e-100	227.55
chr8:8389576	6.4828	0.20811	50.8159	3.74093e-104	1.01729e-99	227.516
chr11:68009101	-6.4422	-0.357195	-50.8141	3.76213e-104	1.01907e-99	227.511
chr15:90594507	-4.79305	-1.05628	-50.8081	3.83353e-104	1.03439e-99	227.492
chr2:208130376	6.6689	-0.0634756	50.8039	3.88344e-104	1.04381e-99	227.479
chr9:36144505	-5.25037	-0.650915	-50.802	3.90728e-104	1.04419e-99	227.473
chr5:142432832	-5.26561	-1.50512	-50.8013	3.91486e-104	1.04419e-99	227.471
chr6:111566946	-4.82659	-1.19195	-50.7805	4.17777e-104	1.11006e-99	227.407
chr7:43648856	-6.34268	-0.56378	-50.7754	4.24525e-104	1.1237e-99	227.391
chr1:220791485	-5.08634	-1.55805	-50.7467	4.6417e-104	1.22243e-99	227.302
chr12:112373652	6.98415	0.374268	50.7459	4.65337e-104	1.22243e-99	227.3
chr3:119418441	7.13427	-0.0994512	50.73	4.89033e-104	1.27985e-99	227.251
chr5:142432833	-5.17	-1.26902	-50.7107	5.19408e-104	1.35426e-99	227.191
chr22:46374537	-6.02415	-1.29159	-50.7035	5.31279e-104	1.38004e-99	227.169
chr1:13731019	-6.27598	-0.31189	-50.6936	5.4792e-104	1.41798e-99	227.138
chr10:124619465	-5.8672	-1.08823	-50.6814	5.69216e-104	1.46233e-99	227.1
chr10:87054945	6.32671	0.527744	50.6813	5.69262e-104	1.46233e-99	227.1
chr1:206558210	-6.75122	-0.512927	-50.6624	6.04017e-104	1.54591e-99	227.042
chr13:30371837	-5.68524	-0.641646	-50.6408	6.46071e-104	1.64748e-99	226.975
chr8:104585996	-5.82366	-0.725	-50.6374	6.53119e-104	1.65699e-99	226.964
chr9:36306820	-6.33854	-0.549146	-50.6367	6.5456e-104	1.65699e-99	226.962
chr17:63435297	-6.4	-0.703415	-50.6332	6.61717e-104	1.66904e-99	226.951
chr15:31405755	-5.24561	-1.06244	-50.6225	6.84241e-104	1.71607e-99	226.918
chr16:17225009	-5.42329	-0.726646	-50.622	6.85291e-104	1.71607e-99	226.916
chr8:126588580	6.03829	0.814878	50.6196	6.90473e-104	1.72284e-99	226.909
chr1:10515932	-5.97232	0.0807927	-50.6054	7.21872e-104	1.79476e-99	226.865
chr17:847175	-5.95256	-1.2047	-50.6036	7.25949e-104	1.79847e-99	226.859
chr15:68206420	-5.93293	-0.952317	-50.6023	7.28889e-104	1.79935e-99	226.855
chr10:8366623	7.11646	0.113354	50.5966	7.42015e-104	1.82528e-99	226.838
chr20:19934768	-5.39488	-0.820732	-50.5828	7.74654e-104	1.89886e-99	226.795
chr21:43598988	6.31195	0.119878	50.5773	7.88059e-104	1.92494e-99	226.778
chr1:59553556	6.48195	0.480122	50.5739	7.96402e-104	1.93852e-99	226.768
chr15:70475302	-6.31305	-0.851646	-50.5629	8.24354e-104	1.99468e-99	226.733
chr8:38872461	6.31293	0.164634	50.5626	8.25203e-104	1.99468e-99	226.732
chr1:13731025	-6.50134	-0.555915	-50.5551	8.44855e-104	2.03511e-99	226.709
chr22:46791449	-5.40207	-1.02994	-50.5531	8.49985e-104	2.04041e-99	226.703
chr10:124341106	-5.80146	-1.47159	-50.5514	8.54752e-104	2.0448e-99	226.697
chr6:6900712	-5.60439	-1.26854	-50.5481	8.63572e-104	2.05883e-99	226.687
chr16:27475725	6.15463	-0.141707	50.5462	8.68695e-104	2.06397e-99	226.681
chr17:82849647	-6.3272	-0.545061	-50.5254	9.2716e-104	2.19539e-99	226.617
chr15:36428224	6.52695	-0.00347561	50.5214	9.38729e-104	2.21525e-99	226.605
chr10:13484153	-6.28049	-0.622317	-50.519	9.45886e-104	2.22459e-99	226.597
chr1:182795666	-5.70805	-0.335122	-50.498	1.01033e-103	2.36817e-99	226.532
chr2:36489378	6.50146	0.0623171	50.4967	1.01427e-103	2.36941e-99	226.528
chr14:76867691	-5.33915	-1.18689	-50.4928	1.0268e-103	2.39067e-99	226.516
chr13:20476007	-5.18549	-0.948963	-50.4897	1.0367e-103	2.40568e-99	226.506
chr15:31264185	-6.56293	-0.655	-50.4858	1.04952e-103	2.41987e-99	226.494
chr16:57801601	4.70415	-1.49439	50.4857	1.04977e-103	2.41987e-99	226.494
chr16:4053503	-5.70805	-1.04951	-50.4731	1.0923e-103	2.50959e-99	226.454
chr1:12133128	-4.55427	-1.44213	-50.4697	1.10384e-103	2.52776e-99	226.444
chr2:235940539	6.87122	-0.284146	50.4639	1.12407e-103	2.56565e-99	226.426
chr6:72812373	6.275	0.238232	50.429	1.25396e-103	2.84318e-99	226.318
chr11:1755616	-5.97305	-0.68311	-50.4281	1.25775e-103	2.84318e-99	226.315
chr14:76867767	-5.28707	-1.21549	-50.428	1.25792e-103	2.84318e-99	226.315
chr22:46374323	-6.89634	-0.480122	-50.4233	1.27666e-103	2.87621e-99	226.3
chr1:66941212	6.04939	-0.112988	50.4206	1.28775e-103	2.89184e-99	226.291
chr4:76984873	6.47232	-0.416768	50.4143	1.31331e-103	2.93112e-99	226.272
chr4:67575476	-5.49085	-0.703841	-50.4142	1.31366e-103	2.93112e-99	226.272
chr19:1214241	-5.54098	-0.643659	-50.413	1.31878e-103	2.93314e-99	226.268
chr1:206558118	-6.62366	-0.766951	-50.4097	1.33231e-103	2.95378e-99	226.258
chr17:63435303	-6.59537	-0.583902	-50.4082	1.3385e-103	2.9581e-99	226.253
chr10:69348995	-4.9611	-1.46311	-50.4007	1.37042e-103	3.01904e-99	226.23
chr16:88235035	6.49939	-0.170305	50.3997	1.37485e-103	3.01926e-99	226.226
chr13:41614447	6.10744	-0.5075	50.3917	1.41003e-103	3.08678e-99	226.201
chr1:243205484	6.79402	0.00567073	50.3865	1.43321e-103	3.12769e-99	226.185
chr7:113431438	5.44256	-0.126646	50.3741	1.49014e-103	3.24177e-99	226.147
chr5:179793793	-5.2539	-1.79366	-50.3562	1.57612e-103	3.41812e-99	226.091
chr11:86559710	6.49451	0.054939	50.3507	1.60344e-103	3.46658e-99	226.074
chr21:43598932	6.81463	0.185732	50.3435	1.64009e-103	3.53483e-99	226.052
chr5:34688185	6.68207	0.229207	50.3402	1.65749e-103	3.56131e-99	226.041
chr4:3385479	-5.64488	-1.33634	-50.3317	1.70213e-103	3.64598e-99	226.015
chr2:19801728	6.14841	-0.138963	50.3255	1.73565e-103	3.70636e-99	225.995
chr7:130488592	6.75549	0.130305	50.3161	1.78748e-103	3.80537e-99	225.966
chr5:10746927	-6.78244	-0.104878	-50.3114	1.81422e-103	3.85053e-99	225.952
chr22:44689249	6.21524	0.12872	50.3072	1.83819e-103	3.88955e-99	225.939
chr4:153082482	-6.0978	-0.374512	-50.2971	1.89789e-103	4.00369e-99	225.907
chr11:12900571	6.79707	0.304756	50.2913	1.93271e-103	4.06484e-99	225.889
chr8:80301272	7.42866	0.0775	50.2823	1.98809e-103	4.16872e-99	225.861
chr3:169665503	6.06829	0.0715854	50.2758	2.02938e-103	4.24251e-99	225.841
chr22:46374610	-6.60134	-0.803963	-50.2711	2.05924e-103	4.29204e-99	225.826
chr3:186986210	-6.17707	-0.683293	-50.2645	2.10261e-103	4.36936e-99	225.805
chr16:68823534	6.65561	-0.0278049	50.26	2.13263e-103	4.41856e-99	225.791
chr14:91400329	-5.88793	-0.804573	-50.2524	2.18456e-103	4.51272e-99	225.768
chr3:112654066	6.48024	0.0202439	50.2329	2.32218e-103	4.78281e-99	225.707
chr16:84874594	6.85378	-0.0912805	50.2295	2.34729e-103	4.82026e-99	225.696
chr1:206558162	-6.36854	-0.364024	-50.2156	2.45261e-103	5.01219e-99	225.653
chr22:46374543	-6.05317	-1.325	-50.2146	2.4605e-103	5.01219e-99	225.65
chr6:163750872	-6.24549	-0.127622	-50.2143	2.46235e-103	5.01219e-99	225.649
chr13:112703341	-5.02012	-0.923841	-50.1999	2.57667e-103	5.22961e-99	225.604
chr12:116371122	6.62134	-0.0365244	50.1969	2.60088e-103	5.26339e-99	225.595
chr12:121240761	-5.32305	-1.75299	-50.1894	2.66381e-103	5.37513e-99	225.571
chr2:87455023	6.00817	0.0684756	50.1786	2.75518e-103	5.54342e-99	225.537
chr7:30169284	6.56	-0.191951	50.1743	2.79307e-103	5.60346e-99	225.524
chr21:44912296	-5.28049	-1.09707	-50.1516	3.00021e-103	6.00173e-99	225.453
chr10:124718445	-4.90378	-1.27287	-50.1498	3.01705e-103	6.01812e-99	225.448
chr3:14424902	-6.41122	-0.720976	-50.1477	3.0378e-103	6.04219e-99	225.441
chr3:125124256	6.70488	0.166341	50.1452	3.06103e-103	6.07107e-99	225.433
chr5:180804058	-6.52488	-0.406463	-50.1377	3.13517e-103	6.20044e-99	225.409
chr22:45226974	-5.31244	-0.416829	-50.1327	3.1847e-103	6.28055e-99	225.394
chr4:70971044	-5.63951	-0.284146	-50.1143	3.37463e-103	6.63631e-99	225.336
chr11:16792134	6.45598	-0.0665244	50.1087	3.43532e-103	6.73664e-99	225.319
chr10:13484133	-6.57207	-0.440427	-50.1002	3.52775e-103	6.89844e-99	225.293
chr20:10982906	6.49805	-0.030122	50.0956	3.58039e-103	6.97079e-99	225.278
chr9:116238615	6.21841	-0.230549	50.0952	3.58477e-103	6.97079e-99	225.277
chr16:11155593	6.79634	0.214634	50.0913	3.62889e-103	7.03676e-99	225.264
chr16:4053434	-5.52049	-1.13024	-50.0904	3.63891e-103	7.03676e-99	225.262
chr17:74443044	-5.99585	-0.843049	-50.0852	3.69923e-103	7.11507e-99	225.245
chr8:140598561	-6.42915	-1.03213	-50.0844	3.70824e-103	7.11507e-99	225.243
chr8:37874514	6.42305	-0.460671	50.0843	3.71007e-103	7.11507e-99	225.243
chr7:104982673	5.45354	-0.956646	50.0825	3.73114e-103	7.13581e-99	225.237
chr6:136365973	-6.21293	-0.456341	-50.0769	3.7975e-103	7.24283e-99	225.219
chr17:78775179	-5.92756	-1.08768	-50.0578	4.03303e-103	7.67105e-99	225.16
chr5:176534382	-4.93646	-2.06091	-50.0519	4.10935e-103	7.79491e-99	225.141
chr4:184407142	-5.80329	-0.581159	-50.0451	4.19918e-103	7.94366e-99	225.12
chr3:14424879	-5.39927	-0.798293	-50.0441	4.21179e-103	7.94592e-99	225.117
chr1:233674106	6.36098	-0.050122	50.0415	4.24607e-103	7.98894e-99	225.109
chr13:95554184	-6.05207	-0.962866	-50.0393	4.27552e-103	8.02267e-99	225.102
chr12:123268257	-5.18061	-1.18713	-50.0381	4.29232e-103	8.03255e-99	225.098
chr1:64569577	-6.08854	-0.63561	-50.0314	4.38357e-103	8.18131e-99	225.077
chr8:127340399	6.56463	-0.0656098	50.0272	4.44221e-103	8.26859e-99	225.064
chr7:50535641	6.7339	0.113415	50.0197	4.54948e-103	8.44568e-99	225.04
chr11:73215977	-5.39329	0.10189	-50.0171	4.58723e-103	8.49311e-99	225.032
chr11:67267979	-5.37732	-1.23988	-50.0073	4.73154e-103	8.73e-99	225.001
chr4:72375357	4.81134	-0.830305	50.0067	4.74026e-103	8.73e-99	225
chr12:14843574	7.42622	0.0114024	50.0037	4.78457e-103	8.78836e-99	224.99
chr1:206558391	-5.33366	-1.45159	-50.001	4.82544e-103	8.84011e-99	224.982
chr16:4516083	-5.80963	-1.04872	-49.9979	4.87433e-103	8.90623e-99	224.972
chr2:235044390	-5.87195	0.208537	-49.9835	5.10126e-103	9.29646e-99	224.927
chr1:12133097	-5.08659	-1.375	-49.9761	5.22159e-103	9.49091e-99	224.904
chr16:29261875	6.33646	-0.342622	49.9748	5.24219e-103	9.50354e-99	224.9
chr8:141266173	-6.06488	-0.855854	-49.9667	5.37814e-103	9.72468e-99	224.875
chr6:22877985	6.76939	0.0479878	49.9642	5.42221e-103	9.76646e-99	224.866
chr17:78775100	-4.85768	-1.32128	-49.9638	5.42931e-103	9.76646e-99	224.865
chr1:93904385	-6.16476	-0.241768	-49.9619	5.46151e-103	9.79906e-99	224.859
chr10:13484251	-5.29695	-0.352378	-49.9485	5.69678e-103	1.01949e-98	224.817
chr1:12133041	-6.38963	-0.527378	-49.9357	5.93318e-103	1.05908e-98	224.777
chr14:63229856	6.13854	-0.0240244	49.9328	5.98784e-103	1.0661e-98	224.768
chr17:78775437	-6.41098	-0.388293	-49.9257	6.1238e-103	1.08752e-98	224.746
chr15:68787886	-5.04561	-0.467317	-49.9211	6.21346e-103	1.09884e-98	224.731
chr14:54569288	7.0422	-0.257439	49.9208	6.21909e-103	1.09884e-98	224.73
chr17:63435278	-6.33549	0.050061	-49.9182	6.27141e-103	1.10528e-98	224.722
chr4:3385584	-6.56354	-0.857256	-49.9143	6.34912e-103	1.11615e-98	224.71
chr1:192657540	6.61366	-0.136341	49.911	6.41474e-103	1.12484e-98	224.7
chr1:206558331	-6.99354	-0.276037	-49.9049	6.53998e-103	1.14392e-98	224.681
chr18:23834929	6.46122	0.358659	49.9036	6.56826e-103	1.14599e-98	224.676
chr19:3338713	-4.80866	-1.46177	-49.9	6.64323e-103	1.15617e-98	224.665
chr5:10702168	6.88098	0.0208537	49.8912	6.83004e-103	1.18572e-98	224.638
chr9:90925831	6.29439	-0.150732	49.8798	7.08196e-103	1.2264e-98	224.602
chr17:847243	-5.96768	-0.887256	-49.8684	7.34185e-103	1.26825e-98	224.566
chr1:64879305	6.85829	-0.0364634	49.8573	7.60581e-103	1.31059e-98	224.531
chr17:40547476	-5.46061	-0.892744	-49.855	7.66133e-103	1.3169e-98	224.524
chr2:202933388	6.20671	0.508963	49.8442	7.9279e-103	1.35936e-98	224.49
chr6:11616406	6.56463	0.264634	49.8431	7.9541e-103	1.36051e-98	224.487
chr12:124716905	-6.02341	-0.570122	-49.8088	8.86924e-103	1.51332e-98	224.379
chr2:174025758	6.97244	-0.0121951	49.8057	8.95634e-103	1.52444e-98	224.369
chr14:91399925	-5.91927	0.01	-49.7952	9.25845e-103	1.57202e-98	224.336
chr3:185656579	6.28451	0.152134	49.781	9.68623e-103	1.63957e-98	224.291
chr7:98218274	-5.19817	-1.28091	-49.7804	9.70339e-103	1.63957e-98	224.29
chr17:57285478	-5.87561	-1.39963	-49.777	9.80988e-103	1.65308e-98	224.279
chr6:111567132	-6.88841	-0.496037	-49.7763	9.83084e-103	1.65308e-98	224.277
chr15:31264228	-5.59622	-0.730915	-49.7738	9.91009e-103	1.66239e-98	224.269
chr15:70475167	-6.53622	-0.817134	-49.7689	1.0064e-102	1.68415e-98	224.253
chr8:22586912	7.25317	-0.0532927	49.7652	1.01847e-102	1.70026e-98	224.242
chr18:54157867	4.99463	1.47756	49.7609	1.03229e-102	1.7169e-98	224.228
chr15:31405756	-5.03378	-1.04909	-49.7606	1.03337e-102	1.7169e-98	224.227
chr9:85262779	6.02659	-0.257439	49.7483	1.07455e-102	1.78108e-98	224.188
chr11:86559714	6.515	0.0634756	49.7427	1.09363e-102	1.80839e-98	224.171
chr2:215498742	6.1978	0.0185366	49.7361	1.11685e-102	1.8424e-98	224.15
chr7:2761414	6.66561	-0.152805	49.7259	1.15369e-102	1.89869e-98	224.118
chr3:14424929	-6.61341	-0.524024	-49.7226	1.16574e-102	1.91268e-98	224.108
chr19:18985643	-5.92549	-0.560549	-49.7221	1.16769e-102	1.91268e-98	224.106
chr12:112373661	7.0111	0.0959146	49.7207	1.1728e-102	1.91653e-98	224.102
chr18:36300248	5.72207	0.763354	49.7192	1.17855e-102	1.92143e-98	224.097
chr13:41614440	6.25939	-0.37128	49.7176	1.18461e-102	1.92679e-98	224.092
chr1:230153970	-5.71134	-0.414329	-49.707	1.22504e-102	1.98791e-98	224.058
chr15:85543861	-5.8061	-0.787317	-49.7035	1.23868e-102	2.0038e-98	224.047
chr14:91400048	-6.18744	-0.630549	-49.703	1.24059e-102	2.0038e-98	224.046
chr3:121871565	-5.59976	-0.282561	-49.6944	1.27494e-102	2.05452e-98	224.019
chr14:103880605	-4.62463	-1.71537	-49.6882	1.30063e-102	2.09108e-98	223.999
chr14:96285794	6	-0.483659	49.6871	1.30486e-102	2.09305e-98	223.996
chr6:6900769	-5.03793	-1.46652	-49.6828	1.32289e-102	2.11709e-98	223.982
chr20:20711575	-5.01829	-1.38732	-49.6793	1.33786e-102	2.13613e-98	223.971
chr5:9714478	6.21146	-0.190976	49.6654	1.39824e-102	2.22743e-98	223.927
chr5:174608722	-5.53878	-1.04732	-49.6637	1.40577e-102	2.23432e-98	223.922
chr7:43648927	-6.93439	-0.548293	-49.6571	1.43569e-102	2.27667e-98	223.901
chr7:36724524	-4.41756	-1.71049	-49.6529	1.45507e-102	2.30216e-98	223.888
chr12:2265227	6.92512	-0.161098	49.6501	1.46781e-102	2.31578e-98	223.879
chr15:68206018	-4.60829	-1.83646	-49.6489	1.47347e-102	2.31578e-98	223.875
chr3:111861704	6.54012	-0.0867683	49.6485	1.47523e-102	2.31578e-98	223.874
chr5:10692722	6.87537	0.0189024	49.6482	1.47698e-102	2.31578e-98	223.873
chr2:63051934	-5.15207	-0.394573	-49.6457	1.48846e-102	2.32853e-98	223.865
chr3:14424903	-5.87732	-0.603293	-49.6404	1.51378e-102	2.36283e-98	223.849
chr5:167710879	6.75146	-0.128171	49.6389	1.52118e-102	2.36907e-98	223.844
chr8:48620364	6.5278	-0.0436585	49.6364	1.53353e-102	2.38297e-98	223.836
chr17:81366008	-6.00634	-0.830854	-49.6348	1.54102e-102	2.38927e-98	223.831
chr4:84877194	6.68732	0.15	49.634	1.5452e-102	2.39043e-98	223.828
chr11:78352427	6.49402	-0.151768	49.612	1.65708e-102	2.55783e-98	223.759
chr1:172928459	6.91061	0.125671	49.6055	1.69178e-102	2.60561e-98	223.738
chr9:73141206	6.00183	0.147378	49.6013	1.71445e-102	2.62982e-98	223.725
chr17:78774969	-6.99951	-0.520976	-49.6012	1.71506e-102	2.62982e-98	223.725
chr22:35742314	6.44561	0.0823171	49.6005	1.71897e-102	2.63003e-98	223.723
chr3:111861632	6.97537	0.040122	49.5955	1.74668e-102	2.66657e-98	223.707
chr7:130488591	6.48878	0.0932927	49.5928	1.76123e-102	2.68289e-98	223.699
chr17:63435277	-6.40915	-0.00762195	-49.5898	1.77857e-102	2.7034e-98	223.689
chr8:22586881	6.82598	-0.00993902	49.5884	1.78655e-102	2.70961e-98	223.684
chr1:12133008	-6.55659	-0.338659	-49.5867	1.79592e-102	2.7179e-98	223.679
chr2:59463570	6.26427	-0.0540854	49.5786	1.84282e-102	2.78282e-98	223.654
chr14:69615691	-5.87073	-1.10073	-49.5742	1.86888e-102	2.81607e-98	223.64
chr7:152136848	6.82049	-0.00256098	49.5712	1.88694e-102	2.83714e-98	223.63
chr7:47517314	-6.19256	0.0104268	-49.5515	2.00885e-102	3.01394e-98	223.568
chr19:4540538	-5.76549	-0.55811	-49.5494	2.02282e-102	3.02837e-98	223.561
chr14:96285786	5.9611	-0.40811	49.5481	2.03084e-102	3.03385e-98	223.557
chr16:85848018	-6.05439	-0.934512	-49.5474	2.0353e-102	3.03401e-98	223.555
chr12:14843653	6.81195	-0.0669512	49.5434	2.06137e-102	3.0663e-98	223.542
chr1:42737336	-5.94671	-0.861402	-49.528	2.16511e-102	3.21375e-98	223.494
chr9:108636655	6.77756	0.144878	49.5268	2.17352e-102	3.21936e-98	223.49
chr15:31264167	-6.74232	-0.584817	-49.5203	2.21872e-102	3.27933e-98	223.47
chr17:64231959	7.03768	0.151646	49.5064	2.31929e-102	3.42072e-98	223.426
chr6:137236841	6.20256	0.0507927	49.5004	2.36428e-102	3.47971e-98	223.407
chr16:29261794	7.05	-0.243537	49.498	2.38218e-102	3.48532e-98	223.399
chr10:3094715	6.07634	0.106098	49.498	2.38292e-102	3.48532e-98	223.399
chr8:141266178	-5.74439	-0.516463	-49.4979	2.38312e-102	3.48532e-98	223.399
chr11:11813511	6.63256	0.353841	49.4801	2.52284e-102	3.68193e-98	223.342
chr6:148065053	6.37878	0.123415	49.4628	2.66591e-102	3.88258e-98	223.287
chr5:34688001	6.26427	0.0177439	49.458	2.70645e-102	3.9334e-98	223.273
chr11:1307411	-6.86683	-0.935244	-49.453	2.75016e-102	3.9886e-98	223.257
chr6:136365954	-5.18451	-0.820549	-49.4522	2.75695e-102	3.99014e-98	223.254
chr8:140598536	-6.53366	-0.749268	-49.4485	2.7899e-102	4.02322e-98	223.242
chr14:99241935	-5.38305	-1.23116	-49.4484	2.79137e-102	4.02322e-98	223.242
chr2:208135249	-5.70305	-0.981159	-49.4425	2.84422e-102	4.09093e-98	223.223
chr11:129061663	6.06537	0.245488	49.4374	2.89059e-102	4.14904e-98	223.207
chr13:94061618	6.03024	-0.142805	49.427	2.9885e-102	4.27841e-98	223.174
chr2:63052127	-4.69463	-1.71159	-49.4265	2.993e-102	4.27841e-98	223.173
chr1:91728739	6.27622	0.441402	49.4225	3.03175e-102	4.32492e-98	223.16
chr14:91124566	-6.21817	-0.295183	-49.4171	3.08388e-102	4.38498e-98	223.143
chr6:53048629	-6.36598	-0.372256	-49.4169	3.08646e-102	4.38498e-98	223.142
chr10:86957686	-4.19244	-1.7178	-49.4116	3.13842e-102	4.44973e-98	223.126
chr7:41916866	6.27293	-0.379756	49.4035	3.2212e-102	4.55781e-98	223.1
chr1:84637143	6.37854	0.369146	49.3922	3.33904e-102	4.71496e-98	223.064
chr1:226664780	5.96524	-0.350061	49.3895	3.36842e-102	4.74683e-98	223.056
chr2:64943926	-6.18805	-0.599024	-49.3782	3.49233e-102	4.9115e-98	223.02
chr16:70700289	-5.25122	-1.29732	-49.3704	3.58047e-102	5.0245e-98	222.995
chr16:82059821	6.06134	-0.185915	49.3693	3.59263e-102	5.0245e-98	222.992
chr5:68434012	6.41488	-0.263049	49.3692	3.59433e-102	5.0245e-98	222.991
chr10:129757364	-6.06244	-0.341098	-49.3664	3.62633e-102	5.05907e-98	222.982
chr7:75962872	5.90171	-0.0336585	49.3607	3.69309e-102	5.1419e-98	222.964
chr1:231636288	5.78866	-0.265793	49.3591	3.71189e-102	5.15777e-98	222.959
chr7:46144741	6.28305	0.1625	49.3541	3.77179e-102	5.23056e-98	222.943
chr6:111277313	6.15524	0.292378	49.3412	3.93006e-102	5.4392e-98	222.903
chr14:20975354	6.35524	0.306159	49.3405	3.94e-102	5.44213e-98	222.9
chr2:174026079	6.91573	-0.00847561	49.3313	4.05647e-102	5.59192e-98	222.871
chr10:5234244	-6.04902	-1.34244	-49.3238	4.15542e-102	5.717e-98	222.847
chr1:2291051	-5.7922	-1.19439	-49.3186	4.2258e-102	5.80237e-98	222.831
chr20:38166629	6.32646	0.0533537	49.3098	4.34585e-102	5.95545e-98	222.803
chr3:136070550	5.21305	-0.634939	49.3076	4.37722e-102	5.97655e-98	222.796
chr9:36306907	-4.3078	-1.82256	-49.3073	4.3807e-102	5.97655e-98	222.795
chr11:1307423	-7.33378	-0.393354	-49.3069	4.387e-102	5.97655e-98	222.794
chr18:74498972	-5.01232	-1.45872	-49.3057	4.40277e-102	5.98633e-98	222.79
chr9:134661880	6.92171	-0.144634	49.2928	4.58903e-102	6.22741e-98	222.749
chr7:75962873	6.84451	-0.0729878	49.2875	4.6667e-102	6.32048e-98	222.732
chr8:122866278	6.5111	0.0812805	49.2839	4.72108e-102	6.38172e-98	222.721
chr5:122155112	6.90646	-0.270061	49.2821	4.74864e-102	6.40107e-98	222.715
chr2:26009460	-5.40598	-1.04372	-49.2818	4.75378e-102	6.40107e-98	222.714
chr4:87108331	6.63878	-0.414268	49.2778	4.81469e-102	6.47057e-98	222.701
chr7:134834940	6.87037	-0.430305	49.2641	5.03071e-102	6.74785e-98	222.658
chr1:12496919	5.90915	0.822134	49.2571	5.14401e-102	6.88656e-98	222.636
chr1:235933428	-4.89415	0.41561	-49.2501	5.26147e-102	7.03029e-98	222.613
chr1:42737278	-5.14598	-0.975427	-49.2449	5.35004e-102	7.13494e-98	222.597
chr1:230153954	-5.30439	-0.825732	-49.2338	5.54262e-102	7.37764e-98	222.562
chr19:53851939	-6.08073	-0.596098	-49.2276	5.65468e-102	7.50158e-98	222.542
chr12:116371104	6.78061	0.0965244	49.2273	5.6592e-102	7.50158e-98	222.541
chr2:200750584	6.44439	-0.232805	49.2268	5.66806e-102	7.50158e-98	222.54
chr5:180804025	-4.9989	-1.41628	-49.2238	5.72345e-102	7.56051e-98	222.53
chr16:58384718	-5.85159	-0.728476	-49.2229	5.73952e-102	7.5669e-98	222.527
chr5:10692681	7.10939	0.129329	49.2223	5.75002e-102	7.5669e-98	222.525
chr13:73913384	6.58951	-0.59061	49.2096	5.989e-102	7.86652e-98	222.485
chr11:1307371	-5.99317	-1.02378	-49.2013	6.15131e-102	8.0645e-98	222.458
chr16:4053431	-5.03427	-1.44055	-49.1938	6.3009e-102	8.24508e-98	222.435
chr10:45420617	-5.86317	-1.06683	-49.1784	6.62029e-102	8.64677e-98	222.386
chr5:14114757	7.13122	0.32939	49.1726	6.74336e-102	8.79102e-98	222.367
chr6:3075774	-4.66171	-1.02402	-49.1712	6.77494e-102	8.81567e-98	222.363
chr8:8389587	6.23549	0.115183	49.1702	6.79621e-102	8.82685e-98	222.36
chr8:2075171	-5.26012	-1.50543	-49.1687	6.82934e-102	8.85336e-98	222.355
chr5:142432734	-5.10659	-1.58354	-49.1681	6.8431e-102	8.85471e-98	222.353
chr6:22878014	6.39707	-0.0260976	49.1645	6.92244e-102	8.94076e-98	222.341
chr21:44912297	-5.52037	-1.04372	-49.1516	7.21379e-102	9.2998e-98	222.3
chr10:13484236	-5.8372	0.469939	-49.1418	7.44558e-102	9.57968e-98	222.269
chr20:22791497	5.99524	0.0568902	49.1412	7.45842e-102	9.57968e-98	222.267
chr1:226664779	6.65451	-0.282622	49.1339	7.63436e-102	9.77699e-98	222.244
chr8:42196242	5.9539	-0.600122	49.1337	7.64012e-102	9.77699e-98	222.243
chr17:28893083	-6.94805	-0.526585	-49.1166	8.07191e-102	1.03106e-97	222.189
chr17:32609315	-6.05976	-0.842073	-49.1106	8.22753e-102	1.04901e-97	222.17
chr4:182240596	6.57707	-0.408171	49.1078	8.30384e-102	1.05681e-97	222.161
chr20:38166519	6.59415	0.145244	49.1024	8.44714e-102	1.07308e-97	222.144
chr8:60792815	-6.34378	-0.331037	-49.099	8.54065e-102	1.08298e-97	222.133
chr14:103045799	-5.39451	-1.43579	-49.0963	8.61567e-102	1.09051e-97	222.124
chr3:86984337	5.78049	-0.14622	49.0944	8.66701e-102	1.09502e-97	222.118
chr1:147760968	6.53805	0.169268	49.0716	9.3259e-102	1.17613e-97	222.046
chr19:47330779	-5.81817	-1.16494	-49.0659	9.49976e-102	1.19589e-97	222.027
chr3:111861734	6.13805	-0.0295122	49.0621	9.61512e-102	1.20799e-97	222.015
chr19:53852000	-6.34476	-0.684451	-49.0616	9.63056e-102	1.20799e-97	222.014
chr2:28583983	6.21902	0.0263415	49.0591	9.70954e-102	1.2157e-97	222.006
chr11:1307432	-6.88244	-0.622683	-49.0573	9.76396e-102	1.22032e-97	222
chr13:30743608	7.16146	-0.114146	49.0565	9.78973e-102	1.22135e-97	221.998
chr1:206558117	-5.85159	-0.592622	-49.0559	9.80742e-102	1.22137e-97	221.996
chr1:2291034	-5.11146	-1.54159	-49.0542	9.86229e-102	1.22601e-97	221.99
chr10:124341122	-5.77585	-1.43829	-49.0506	9.9775e-102	1.23812e-97	221.979
chr1:15214930	6.43159	0.0431098	49.0497	1.00072e-101	1.23959e-97	221.976
chr13:111282254	-5.05024	0.0603659	-49.0427	1.0235e-101	1.26556e-97	221.953
chr7:2761541	7.1278	0.273902	49.0382	1.03827e-101	1.28154e-97	221.939
chr19:6772752	-4.7711	-1.5286	-49.0319	1.0597e-101	1.30569e-97	221.919
chr13:41614446	6.46512	-0.432195	49.0293	1.06855e-101	1.31426e-97	221.911
chr17:78681111	6.16976	-0.427195	49.0251	1.08284e-101	1.32949e-97	221.898
chr2:232315723	-6.5322	-0.675	-49.0176	1.10936e-101	1.35966e-97	221.874
chr20:56987467	6.10744	0.0466463	49.0145	1.1204e-101	1.37077e-97	221.864
chr14:100222560	-4.43085	-1.72738	-49.0131	1.12553e-101	1.37463e-97	221.859
chr15:67098762	-5.94195	-1.01012	-49.0073	1.14676e-101	1.39811e-97	221.841
chr2:43737534	6.79183	0.130061	49.0021	1.16594e-101	1.41901e-97	221.824
chr17:78774968	-5.92707	-0.353415	-48.9997	1.17507e-101	1.42762e-97	221.817
chr11:44788981	-4.94707	-1.55366	-48.9983	1.18041e-101	1.43162e-97	221.812
chr22:46374283	-6.51451	-0.476159	-48.9942	1.19606e-101	1.44807e-97	221.799
chr7:98218310	-4.88817	-1.31774	-48.9898	1.21314e-101	1.46619e-97	221.785
chr3:112654065	6.78646	0.0388415	48.9879	1.2206e-101	1.47266e-97	221.779
chr2:11381294	-4.98695	-1.34591	-48.9794	1.25429e-101	1.51069e-97	221.752
chr8:99705917	6.43134	0.10872	48.9779	1.26036e-101	1.51538e-97	221.747
chr6:163750791	-6.31183	-0.464695	-48.9743	1.27509e-101	1.53044e-97	221.736
chr10:35876445	6.30098	-0.368415	48.9686	1.299e-101	1.55646e-97	221.717
chr6:157659717	-5.24415	-0.92939	-48.9677	1.30242e-101	1.55788e-97	221.714
chr6:12279531	6.65183	0.0120122	48.964	1.31813e-101	1.57396e-97	221.703
chr19:1214208	-5.31988	-0.514939	-48.9616	1.32853e-101	1.58366e-97	221.695
chr17:82849648	-6.1261	-0.541341	-48.9587	1.34106e-101	1.59587e-97	221.685
chr3:3666438	-6.04939	-0.512744	-48.9449	1.40199e-101	1.66552e-97	221.641
chr5:122155137	6.62512	0.115732	48.9299	1.47115e-101	1.74471e-97	221.594
chr16:29261883	5.88476	-0.524329	48.9267	1.48636e-101	1.75886e-97	221.583
chr1:44423925	-4.70256	-1.77079	-48.9263	1.48814e-101	1.75886e-97	221.582
chr11:16815367	-5.37122	-1.10098	-48.9241	1.49908e-101	1.7688e-97	221.575
chr10:3094683	5.94561	0.132195	48.918	1.52869e-101	1.80067e-97	221.556
chr7:100857230	6.32037	0.333963	48.8899	1.67327e-101	1.96765e-97	221.466
chr1:64133231	5.8528	-0.637256	48.8888	1.67954e-101	1.9717e-97	221.462
chr14:68620294	6.44024	-0.0818293	48.8851	1.69942e-101	1.99167e-97	221.451
chr16:89581340	7.00902	-0.203902	48.8791	1.73289e-101	2.02749e-97	221.431
chr1:64879186	6.21463	-0.107195	48.8784	1.73679e-101	2.02863e-97	221.429
chr2:235940489	6.65659	-0.34061	48.8755	1.75312e-101	2.04428e-97	221.42
chr11:9838432	6.74927	-0.017439	48.8697	1.78627e-101	2.07946e-97	221.401
chr5:95786829	6.11244	0.0469512	48.869	1.78997e-101	2.08029e-97	221.399
chr10:76431283	6.82232	0.389207	48.8678	1.79692e-101	2.08488e-97	221.395
chr10:8366637	7.31159	0.236524	48.8662	1.80627e-101	2.09224e-97	221.39
chr2:88690764	6.73354	0.242744	48.8639	1.81975e-101	2.10436e-97	221.383
chr4:3385356	-4.95854	-1.80171	-48.8602	1.8417e-101	2.12621e-97	221.371
chr22:46374613	-5.5772	-1.54884	-48.8515	1.89401e-101	2.18298e-97	221.343
chr16:85847885	-6.65695	-0.614573	-48.8492	1.90788e-101	2.19533e-97	221.336
chr7:98218311	-5.135	-1.1953	-48.8475	1.91879e-101	2.20424e-97	221.33
chr1:59147335	5.2878	-1.47976	48.8463	1.92621e-101	2.20912e-97	221.326
chr10:71244883	-5.36976	-0.819756	-48.8439	1.9408e-101	2.22219e-97	221.319
chr6:137895199	6.18659	0.0291463	48.841	1.95906e-101	2.23941e-97	221.31
chr8:48620114	7.345	-0.0401829	48.835	1.99759e-101	2.27971e-97	221.29
chr10:45420680	-6.03171	-1.10463	-48.8241	2.06884e-101	2.35716e-97	221.255
chr10:8366681	6.72695	-0.167134	48.8229	2.0774e-101	2.36304e-97	221.251
chr14:71119276	6.41244	0.354634	48.8164	2.12082e-101	2.40851e-97	221.231
chr3:197730364	5.85024	-0.395366	48.8156	2.12694e-101	2.41152e-97	221.228
chr14:91399934	-6.28768	-0.0446951	-48.8064	2.19039e-101	2.47942e-97	221.199
chr2:227871073	7.02207	0.153354	48.7976	2.25406e-101	2.54735e-97	221.17
chr10:3993199	5.88159	1.10079	48.7891	2.31677e-101	2.61398e-97	221.143
chr12:14843573	7.12402	-0.0796951	48.7856	2.34265e-101	2.6389e-97	221.132
chr4:40311891	-5.7589	-0.565305	-48.7791	2.39232e-101	2.6905e-97	221.111
chr3:8888165	6.12915	0.103963	48.7719	2.44858e-101	2.74933e-97	221.088
chr2:37323778	4.05598	-2.09811	48.7705	2.45976e-101	2.75744e-97	221.084
chr2:172783216	4.80341	-1.61305	48.7669	2.48852e-101	2.78127e-97	221.072
chr6:111567218	-6.475	-0.738354	-48.7669	2.48901e-101	2.78127e-97	221.072
chr7:116355830	5.63195	-0.182561	48.764	2.51249e-101	2.80301e-97	221.063
chr2:174025764	6.72817	-0.0659146	48.7565	2.57398e-101	2.86701e-97	221.039
chr3:8851794	6.81732	0.0445122	48.7545	2.59039e-101	2.88068e-97	221.033
chr1:206575522	-6.41244	-1.05878	-48.7515	2.61593e-101	2.90445e-97	221.023
chr9:131650749	7.03085	0.0265244	48.75	2.62842e-101	2.91366e-97	221.018
chr2:149411200	6.80793	0.0817683	48.7495	2.63265e-101	2.91371e-97	221.016
chr22:45235685	-6.07195	-0.609512	-48.7486	2.64071e-101	2.91736e-97	221.013
chr10:102658219	-5.58488	-0.977805	-48.7481	2.64433e-101	2.91736e-97	221.012
chr7:157302607	-6.11122	-1.13732	-48.7473	2.65099e-101	2.92008e-97	221.01
chr5:170353767	4.93829	0.254756	48.7462	2.66077e-101	2.92622e-97	221.006
chr8:48620326	6.6989	0.0138415	48.7441	2.67877e-101	2.94138e-97	220.999
chr8:37874567	6.33695	-0.394085	48.7428	2.69044e-101	2.94954e-97	220.995
chr11:86559732	6.20293	0.116707	48.7406	2.70952e-101	2.96578e-97	220.988
chr15:90594477	-5.66866	-1.01982	-48.7395	2.71884e-101	2.97131e-97	220.985
chr10:102658156	-4.82439	-0.788171	-48.7388	2.72505e-101	2.97343e-97	220.982
chr14:76867857	-5.28366	-1.4178	-48.7331	2.77574e-101	3.024e-97	220.964
chr7:98202661	-6.19598	-0.412256	-48.7306	2.79817e-101	3.04367e-97	220.956
chr17:62134646	5.45098	0.545366	48.73	2.80359e-101	3.04481e-97	220.954
chr22:46791450	-5.27232	-0.965305	-48.7235	2.86375e-101	3.1053e-97	220.933
chr15:85543920	-5.15195	-1.15841	-48.7217	2.8805e-101	3.11861e-97	220.927
chr6:53465366	6.86098	-0.158171	48.7202	2.89444e-101	3.12883e-97	220.922
chr11:67267973	-5.98537	-0.82	-48.7132	2.9604e-101	3.19517e-97	220.9
chr20:51695873	-5.71317	-1.25854	-48.7126	2.96606e-101	3.19633e-97	220.898
chr3:54901489	6.29366	-0.0856098	48.7115	2.97691e-101	3.20307e-97	220.895
chr13:28477544	5.29024	0.458902	48.7099	2.99226e-101	3.21461e-97	220.889
chr9:5558491	-4.69488	-1.51854	-48.7026	3.0634e-101	3.28597e-97	220.866
chr17:77342575	-5.91573	-0.339939	-48.7001	3.08815e-101	3.30742e-97	220.858
chr9:69176094	7.01439	0.292683	48.6971	3.11893e-101	3.33525e-97	220.848
chr6:29516204	-4.60085	-1.89933	-48.6936	3.15416e-101	3.36775e-97	220.837
chr16:89362254	-4.81159	-1.14994	-48.6919	3.17151e-101	3.38109e-97	220.832
chr10:129757363	-5.99683	-0.404756	-48.6846	3.24707e-101	3.45635e-97	220.808
chr13:77529832	6.43122	-0.092439	48.6813	3.28248e-101	3.48406e-97	220.798
chr8:8389575	6.14805	0.197073	48.6812	3.28311e-101	3.48406e-97	220.797
chr4:143348713	6.48171	0.0792683	48.6756	3.34339e-101	3.54263e-97	220.779
chr2:235044353	-6.11146	-0.247683	-48.6659	3.44995e-101	3.64998e-97	220.748
chr4:25861383	-5.43463	-0.927317	-48.661	3.50436e-101	3.70192e-97	220.733
chr8:22586827	6.71378	0.0668902	48.6489	3.64491e-101	3.84456e-97	220.694
chr15:28108031	-4.8878	-1.50171	-48.6466	3.67155e-101	3.8668e-97	220.687
chr2:172783217	4.67378	-1.57201	48.6402	3.74913e-101	3.94255e-97	220.666
chr3:45942576	5.82841	0.116646	48.6353	3.80919e-101	3.99966e-97	220.65
chr2:208130365	6.8022	0.0357317	48.6248	3.94048e-101	4.13128e-97	220.616
chr8:141147098	6.64256	-0.121524	48.6236	3.95648e-101	4.14181e-97	220.612
chr6:11616407	6.37707	0.265488	48.6091	4.14573e-101	4.33342e-97	220.566
chr2:43537378	-6.31524	-0.1975	-48.6063	4.18395e-101	4.36682e-97	220.557
chr7:16834093	6.83732	0.315366	48.605	4.20169e-101	4.37876e-97	220.553
chr1:181062954	-4.05378	-1.89604	-48.6039	4.21642e-101	4.38754e-97	220.549
chr1:2127228	-5.80098	-1.27098	-48.5996	4.27504e-101	4.4419e-97	220.536
chr16:4053531	-5.93671	-0.637134	-48.5984	4.29182e-101	4.45269e-97	220.532
chr3:112654152	6.46451	-0.14372	48.5954	4.33495e-101	4.49075e-97	220.522
chr6:63817792	5.68671	0.147622	48.5946	4.34551e-101	4.49499e-97	220.519
chr8:140598576	-5.19951	-1.11512	-48.5927	4.37174e-101	4.51542e-97	220.513
chr13:52417069	-5.0022	-0.330976	-48.5917	4.38717e-101	4.52158e-97	220.51
chr2:130375255	6.82366	-0.143537	48.5914	4.3907e-101	4.52158e-97	220.509
chr1:13731059	-6.50256	-0.537866	-48.5898	4.41399e-101	4.53886e-97	220.504
chr6:136365953	-5.57659	-0.892927	-48.5889	4.42634e-101	4.54485e-97	220.501
chr11:27385372	6.54305	-0.13628	48.5851	4.4809e-101	4.59409e-97	220.489
chr1:192657514	6.0411	-0.584451	48.5806	4.54746e-101	4.65548e-97	220.474
chr5:83026295	6.53866	-0.00530488	48.5769	4.60246e-101	4.70486e-97	220.462
chr16:70700356	-6.07634	-0.955976	-48.5745	4.63729e-101	4.73352e-97	220.455
chr7:92653429	6.16061	0.286037	48.5723	4.67129e-101	4.76124e-97	220.448
chr7:94906713	5.89012	-0.617744	48.5685	4.72931e-101	4.81333e-97	220.435
chr20:38166679	6.3922	0.00841463	48.5653	4.77771e-101	4.85549e-97	220.425
chr11:8835919	6.45293	-0.175854	48.5526	4.97937e-101	5.05306e-97	220.384
chr17:60371976	-6.26427	0.0148171	-48.5496	5.02748e-101	5.09445e-97	220.375
chr9:83665900	-5.48146	-0.49	-48.5476	5.05999e-101	5.11995e-97	220.368
chr12:121240723	-5.2911	-1.55665	-48.5465	5.07894e-101	5.13166e-97	220.365
chr15:64010837	-5.30451	-1.16128	-48.5443	5.11489e-101	5.16049e-97	220.358
chr3:195906970	-5.60195	-1.41902	-48.5432	5.13404e-101	5.16928e-97	220.354
chr5:68434008	6.45037	-0.151037	48.5429	5.13845e-101	5.16928e-97	220.353
chr10:7827210	5.46902	0.900488	48.5386	5.21082e-101	5.23452e-97	220.339
chr14:31966283	6.27085	-0.286524	48.5328	5.30929e-101	5.32575e-97	220.321
chr7:102125596	6.53427	-0.0246951	48.531	5.33982e-101	5.34867e-97	220.315
chr2:241269011	5.83634	0.202683	48.5274	5.40289e-101	5.39753e-97	220.303
chr8:80301265	7.27402	0.139573	48.5274	5.40411e-101	5.39753e-97	220.303
chr17:78774983	-6.70695	0.0834756	-48.5268	5.41313e-101	5.3988e-97	220.301
chr7:98202697	-6.46195	-0.411341	-48.5249	5.44661e-101	5.4187e-97	220.295
chr14:50846609	6.91439	0.0567073	48.5246	5.45238e-101	5.4187e-97	220.294
chr5:128573895	6.58061	0.0282317	48.5243	5.45757e-101	5.4187e-97	220.293
chr15:39473128	6.31817	-0.0398171	48.5239	5.46422e-101	5.4187e-97	220.292
chr9:90925841	5.74878	0.123171	48.521	5.5165e-101	5.46276e-97	220.283
chr16:22371433	6.50634	0.454268	48.5181	5.56963e-101	5.50754e-97	220.273
chr19:54210079	-5.66329	-1.21677	-48.5145	5.63371e-101	5.563e-97	220.262
chr8:140598569	-5.6278	-0.898049	-48.513	5.66178e-101	5.57529e-97	220.257
chr1:203558752	6.63768	0.113598	48.5126	5.66896e-101	5.57529e-97	220.256
chr17:78681294	7.26463	0.0732927	48.5125	5.67018e-101	5.57529e-97	220.255
chr17:78774935	-6.19329	-0.393598	-48.5066	5.78121e-101	5.67645e-97	220.236
chr21:31336142	6.59183	0.15811	48.5021	5.8649e-101	5.75051e-97	220.222
chr1:84755259	5.85671	0.700915	48.4996	5.91318e-101	5.78969e-97	220.214
chr10:3330744	6.10744	-0.827378	48.4991	5.92214e-101	5.79032e-97	220.212
chr12:54052307	-6.06049	-0.650366	-48.4949	6.00332e-101	5.85622e-97	220.199
chr11:94513143	-5.71902	-0.829634	-48.4948	6.00636e-101	5.85622e-97	220.198
chr12:27521395	6.10988	0.106159	48.4934	6.03253e-101	5.8735e-97	220.194
chr2:63052509	-5.15732	-0.982683	-48.4871	6.15802e-101	5.98732e-97	220.174
chr5:179794071	-5.18915	-1.56396	-48.4861	6.17867e-101	5.99901e-97	220.17
chr15:58742613	5.93976	-0.61	48.4855	6.19081e-101	6.00243e-97	220.168
chr17:847174	-5.47622	-1.08957	-48.4767	6.36901e-101	6.16662e-97	220.14
chr11:67417125	-4.70878	-0.962927	-48.4756	6.3929e-101	6.18115e-97	220.136
chr6:43851210	6.64683	0.163902	48.4732	6.44244e-101	6.22041e-97	220.129
chr7:47691381	6.87524	0.219695	48.4723	6.46124e-101	6.22992e-97	220.126
chr6:63817877	5.95988	0.645549	48.4695	6.51986e-101	6.27775e-97	220.117
chr12:26198995	6.54683	-0.136585	48.4673	6.56719e-101	6.31459e-97	220.11
chr5:78677936	6.54256	-0.199573	48.4605	6.7129e-101	6.44578e-97	220.088
chr11:460479	7.09854	-0.123659	48.4598	6.72961e-101	6.45293e-97	220.085
chr7:30169489	6.43707	-0.278659	48.4509	6.92724e-101	6.6333e-97	220.057
chr15:57122542	-6.14098	-0.331098	-48.4475	7.00416e-101	6.69774e-97	220.046
chr17:32609314	-6.10878	-0.556341	-48.4433	7.09902e-101	6.77026e-97	220.032
chr20:1122636	-5.08244	-1.38366	-48.4433	7.09945e-101	6.77026e-97	220.032
chr8:25252508	6.11817	0.151646	48.434	7.31674e-101	6.96793e-97	220.002
chr7:73707459	-5.01183	-1.23677	-48.4335	7.32802e-101	6.96914e-97	220.001
chr2:174026080	7.15378	0.164329	48.4321	7.36174e-101	6.99166e-97	219.996
chr2:36489401	6.395	0.0185976	48.4284	7.45231e-101	7.06803e-97	219.984
chr13:41614316	7.02585	0.161098	48.4249	7.53745e-101	7.13906e-97	219.973
chr5:142316266	-4.5311	-1.58909	-48.4222	7.60367e-101	7.19199e-97	219.964
chr7:116355910	6.08024	0.282683	48.4218	7.61408e-101	7.19207e-97	219.963
chr7:43648754	-6.05024	-0.564146	-48.4193	7.67569e-101	7.24044e-97	219.955
chr5:68434032	6.44939	-0.222866	48.4157	7.76439e-101	7.31419e-97	219.944
chr9:100429475	6.51585	-0.355366	48.4106	7.89584e-101	7.4254e-97	219.927
chr1:93567335	6.75098	0.211829	48.4103	7.90377e-101	7.4254e-97	219.926
chr8:80301286	7.34427	0.0781098	48.4078	7.96799e-101	7.47564e-97	219.918
chr4:76984950	6.82756	-0.468415	48.4064	8.00402e-101	7.49934e-97	219.913
chr1:44810324	-5.9061	-1.10695	-48.4052	8.03403e-101	7.51734e-97	219.91
chr4:8354387	6.57878	-0.269024	48.403	8.09184e-101	7.56127e-97	219.903
chr21:16569819	6.615	0.0466463	48.402	8.11881e-101	7.5763e-97	219.899
chr10:68650266	5.6561	0.688659	48.3968	8.25877e-101	7.69659e-97	219.882
chr7:47517273	-6.6122	0.0946341	-48.3955	8.29154e-101	7.71681e-97	219.878
chr21:27423296	6.5972	-0.162256	48.3882	8.49302e-101	7.89376e-97	219.855
chr6:139338033	-5.74122	-0.608293	-48.3866	8.53707e-101	7.92413e-97	219.849
chr20:38166496	6.38695	0.116159	48.3841	8.60673e-101	7.97397e-97	219.841
chr16:17364602	-6.17146	-0.279512	-48.3838	8.61367e-101	7.97397e-97	219.841
chr12:64671780	5.68561	-0.410488	48.3816	8.67661e-101	8.02156e-97	219.833
chr10:96665586	6.04695	0.037622	48.38	8.72159e-101	8.05245e-97	219.828
chr18:74929256	5.93756	-0.0189024	48.3791	8.74809e-101	8.06622e-97	219.825
chr6:52342117	-5.43976	0.0109756	-48.3782	8.77326e-101	8.07873e-97	219.822
chr10:8366621	7.06122	0.0921951	48.3777	8.78715e-101	8.08083e-97	219.821
chr3:14424930	-6.2422	-0.346585	-48.3767	8.81658e-101	8.0972e-97	219.818
chr21:32022370	-5.31878	-1.06988	-48.3686	9.05108e-101	8.30162e-97	219.791
chr1:58942023	-6.06207	0.029939	-48.3655	9.14268e-101	8.3746e-97	219.781
chr3:13543538	6.56146	-0.0590244	48.3618	9.25246e-101	8.46401e-97	219.77
chr8:95693464	5.28	-0.816951	48.3599	9.31057e-101	8.50599e-97	219.763
chr10:124341138	-4.87988	-1.7636	-48.3584	9.35624e-101	8.53651e-97	219.759
chr3:194386186	5.91671	0.0728659	48.355	9.46157e-101	8.62132e-97	219.747
chr6:43056143	5.57476	0.75872	48.3485	9.66296e-101	8.79252e-97	219.727
chr3:71444091	-5.26915	-0.95689	-48.3481	9.67472e-101	8.79252e-97	219.725
chr10:96606446	6.71012	0.316159	48.3349	1.0101e-100	9.16795e-97	219.683
chr1:87561107	6.96085	0.255793	48.3288	1.03014e-100	9.33167e-97	219.663
chr13:110399406	6.26915	-0.034939	48.3286	1.03082e-100	9.33167e-97	219.662
chr13:32824200	7.03341	0.311463	48.3275	1.03447e-100	9.35259e-97	219.659
chr2:37614404	7.38049	0.203293	48.327	1.03616e-100	9.35569e-97	219.657
chr15:90594556	-5.81146	-0.585244	-48.326	1.03958e-100	9.37443e-97	219.654
chr14:91400029	-6.14488	0.282683	-48.3254	1.04169e-100	9.38126e-97	219.652
chr2:208130468	6.44841	-0.0645732	48.3229	1.05034e-100	9.44694e-97	219.644
chr2:8526041	-5.12768	-1.24506	-48.322	1.05335e-100	9.46178e-97	219.641
chr12:92075834	6.75134	0.0303049	48.3209	1.05707e-100	9.48303e-97	219.637
chr10:113007843	5.66098	0.0454878	48.3155	1.07582e-100	9.63883e-97	219.62
chr7:151472860	-6.1911	0.35811	-48.3145	1.07918e-100	9.65647e-97	219.617
chr11:12398236	5.86646	-0.305549	48.3117	1.08937e-100	9.7351e-97	219.608
chr8:37874515	6.19939	-0.324329	48.3096	1.09658e-100	9.787e-97	219.601
chr1:87561106	6.68927	-0.00512195	48.3086	1.10009e-100	9.80575e-97	219.598
chr20:38166497	6.49341	0.050122	48.3076	1.10393e-100	9.82737e-97	219.594
chr7:30169596	6.44427	0.144451	48.3068	1.1069e-100	9.84122e-97	219.592
chr8:42196209	6.42293	0.357927	48.3012	1.12694e-100	1.00066e-96	219.574
chr14:96285765	6.3122	-0.220366	48.3008	1.12849e-100	1.00077e-96	219.573
chr17:81365836	-4.66561	-1.58549	-48.2984	1.13759e-100	1.00755e-96	219.565
chr1:81149860	6.3228	0.0168902	48.2936	1.15548e-100	1.0221e-96	219.549
chr1:206558130	-6.22207	-0.33372	-48.2925	1.15952e-100	1.02437e-96	219.546
chr1:147761294	6.63171	0.0317073	48.2851	1.1877e-100	1.04793e-96	219.522
chr22:46374542	-5.83012	-1.3647	-48.2702	1.24677e-100	1.09866e-96	219.474
chr2:112150811	6.3172	-0.369451	48.2686	1.2534e-100	1.1031e-96	219.468
chr6:43851215	6.76049	-0.017439	48.2594	1.29174e-100	1.13541e-96	219.439
chr15:98689819	6.66061	0.0557927	48.2562	1.30501e-100	1.14563e-96	219.428
chr2:47177320	-4.22695	-1.86884	-48.2457	1.35067e-100	1.18422e-96	219.394
chr7:100857235	6.13012	0.309207	48.2353	1.39721e-100	1.22348e-96	219.361
chr17:847156	-6.34683	-0.684146	-48.2291	1.42557e-100	1.24675e-96	219.341
chr1:9900670	-4.98512	-1.29159	-48.2258	1.44115e-100	1.2588e-96	219.33
chr5:150317027	6.0078	0.106463	48.2241	1.44888e-100	1.26396e-96	219.325
chr5:129973978	6.41085	0.150305	48.2236	1.45167e-100	1.26481e-96	219.323
chr20:56987457	6.05939	0.0740854	48.2228	1.45532e-100	1.26641e-96	219.32
chr6:53465359	7.02585	-0.0629268	48.2215	1.46129e-100	1.27001e-96	219.316
chr4:156765338	6.31049	0.15939	48.2209	1.46414e-100	1.2709e-96	219.314
chr14:96285770	6.60329	0.10128	48.2203	1.46727e-100	1.27203e-96	219.312
chr10:129757382	-5.54037	-0.730671	-48.2174	1.48105e-100	1.28238e-96	219.303
chr8:95693478	5.21	-0.711829	48.2149	1.49318e-100	1.29074e-96	219.295
chr12:14843809	7.00427	0.233354	48.2145	1.49539e-100	1.29074e-96	219.293
chr12:121240971	-5.33427	-1.51482	-48.2143	1.49627e-100	1.29074e-96	219.293
chr6:163750869	-6.08061	-0.278598	-48.2104	1.5151e-100	1.30537e-96	219.28
chr2:11753914	-5.20024	-0.979268	-48.2096	1.51931e-100	1.30738e-96	219.278
chr3:194095696	-5.4639	-0.942683	-48.205	1.54223e-100	1.32461e-96	219.263
chr13:77176553	6.05183	0.220061	48.2048	1.54314e-100	1.32461e-96	219.262
chr3:54901533	6.75049	0.224024	48.2026	1.55416e-100	1.33242e-96	219.255
chr15:58547346	6.86244	0.0841463	48.1955	1.59094e-100	1.36228e-96	219.232
chr1:63918310	6.18207	0.069939	48.1942	1.59731e-100	1.36555e-96	219.228
chr13:51975140	6.35744	-0.00213415	48.194	1.59868e-100	1.36555e-96	219.227
chr11:8835873	6.87061	0.143963	48.1931	1.6033e-100	1.36782e-96	219.224
chr10:96665570	5.8761	-0.369756	48.1916	1.61143e-100	1.37307e-96	219.219
chr5:56811230	6.09329	0.141402	48.1892	1.62378e-100	1.3819e-96	219.212
chr5:150317048	6.46317	-0.0595122	48.1867	1.63713e-100	1.39156e-96	219.203
chr17:78775178	-5.45293	-0.882561	-48.1858	1.64177e-100	1.3932e-96	219.201
chr8:105321719	5.92951	0.025	48.1852	1.64506e-100	1.3932e-96	219.199
chr6:14758472	-5.40061	-0.469085	-48.1852	1.64506e-100	1.3932e-96	219.199
chr16:4032945	-5.55476	-0.796768	-48.1798	1.67426e-100	1.41621e-96	219.181
chr22:44689220	5.78122	0.0526829	48.1778	1.68532e-100	1.42383e-96	219.175
chr2:174052615	6.28524	-0.163476	48.1725	1.71504e-100	1.44719e-96	219.157
chr13:75804243	6.21573	0.359085	48.1715	1.7202e-100	1.44979e-96	219.154
chr16:85847955	-6.14829	-1.7422	-48.1652	1.75597e-100	1.47814e-96	219.134
chr12:111181123	-6.18598	-0.5625	-48.1601	1.78565e-100	1.50131e-96	219.117
chr18:74929274	5.92585	0.0840244	48.1571	1.80334e-100	1.51435e-96	219.108
chr9:130893911	-6.1578	-1.11451	-48.1448	1.87712e-100	1.57441e-96	219.068
chr3:14424844	-5.70415	-0.80561	-48.1398	1.90807e-100	1.59844e-96	219.052
chr19:2497339	4.9461	0.83622	48.1366	1.9283e-100	1.61155e-96	219.041
chr8:120538509	6.5372	0.490183	48.1366	1.92835e-100	1.61155e-96	219.041
chr4:52913862	6.55915	0.154329	48.1358	1.9332e-100	1.61367e-96	219.039
chr4:67575455	-5.71293	-0.687561	-48.1348	1.93951e-100	1.617e-96	219.035
chr4:2811996	-4.8661	-2.28012	-48.1297	1.97236e-100	1.64242e-96	219.019
chr5:139670574	-5.37073	0.155366	-48.1221	2.02169e-100	1.68149e-96	218.994
chr4:6918375	-5.20146	-1.26817	-48.1162	2.06083e-100	1.71199e-96	218.975
chr22:35638496	6.58476	0.0077439	48.1148	2.07072e-100	1.71816e-96	218.97
chr14:103880529	-5.18195	-1.68756	-48.111	2.09647e-100	1.73745e-96	218.958
chr2:215498677	6.45463	-0.00853659	48.1038	2.14641e-100	1.77673e-96	218.935
chr22:26671438	-6.04341	-0.401585	-48.0991	2.17933e-100	1.80183e-96	218.92
chr1:178451598	6.70244	0.0767073	48.0984	2.18431e-100	1.80381e-96	218.917
chr1:55402406	5.93878	-0.284268	48.0941	2.21535e-100	1.82728e-96	218.903
chr9:90925840	6.45573	0.109329	48.0933	2.2209e-100	1.82968e-96	218.901
chr8:48620022	7.41207	-0.1425	48.0926	2.22653e-100	1.83215e-96	218.898
chr15:39232816	7.20707	0.0239024	48.0854	2.27964e-100	1.87364e-96	218.875
chr22:45235597	-6.20146	-0.669146	-48.0811	2.31161e-100	1.89768e-96	218.861
chr1:44801721	5.34634	-0.376707	48.0788	2.32873e-100	1.90948e-96	218.854
chr2:227871077	6.48585	0.234268	48.0783	2.33244e-100	1.91028e-96	218.852
chr8:134720637	-6.59354	-0.479695	-48.0765	2.34644e-100	1.91948e-96	218.846
chr8:22542125	6.00915	-0.238476	48.0732	2.37179e-100	1.93621e-96	218.836
chr15:68052777	5.4778	0.455854	48.0731	2.37245e-100	1.93621e-96	218.835
chr4:143348681	5.93463	-0.286341	48.0727	2.37587e-100	1.93673e-96	218.834
chr17:1096409	-5.14085	-0.655915	-48.0722	2.37986e-100	1.93771e-96	218.832
chr7:30169302	6.62378	-0.175915	48.0716	2.38435e-100	1.93787e-96	218.83
chr15:39271090	6.0689	-0.119207	48.0715	2.38563e-100	1.93787e-96	218.83
chr9:27531140	6.13305	0.0334756	48.0638	2.44572e-100	1.98437e-96	218.805
chr4:40301754	-5.72402	-0.396402	-48.0467	2.58724e-100	2.09676e-96	218.749
chr6:111567102	-6.06098	-0.144878	-48.0439	2.61048e-100	2.11313e-96	218.741
chr6:6900699	-4.60378	-1.91555	-48.0425	2.62244e-100	2.12035e-96	218.736
chr9:17048429	5.32305	0.56811	48.035	2.6877e-100	2.17059e-96	218.712
chr16:88234732	6.3689	-0.648354	48.0298	2.73387e-100	2.20532e-96	218.695
chr22:35638495	6.98646	0.325793	48.0285	2.7458e-100	2.21237e-96	218.69
chr2:98446118	6.73476	-0.446037	48.0275	2.75473e-100	2.217e-96	218.687
chr19:6772872	-5.75232	-1.01835	-48.0218	2.80666e-100	2.25534e-96	218.669
chr11:16815368	-5.54488	-1.04207	-48.0215	2.80884e-100	2.25534e-96	218.668
chr3:130491509	6.6572	0.0484756	48.0195	2.82804e-100	2.26756e-96	218.661
chr3:181741607	5.01573	0.73372	48.0192	2.83057e-100	2.26756e-96	218.66
chr1:226664754	5.91402	-0.226037	48.0183	2.83852e-100	2.27131e-96	218.657
chr8:104337344	6.74707	0.300366	48.0152	2.86795e-100	2.29158e-96	218.647
chr5:14118544	5.65207	0.19372	48.0146	2.873e-100	2.29158e-96	218.645
chr2:200750498	6.73598	-0.134817	48.0146	2.87372e-100	2.29158e-96	218.645
chr2:174026066	6.79293	0.294268	48.0124	2.89449e-100	2.30367e-96	218.638
chr1:19463339	-5.71756	-0.757195	-48.0123	2.89551e-100	2.30367e-96	218.638
chr10:3094748	5.91232	0.00640244	48.0094	2.92312e-100	2.32298e-96	218.628
chr5:128536359	6.90951	-0.27561	48.0082	2.934e-100	2.32683e-96	218.625
chr5:68434111	4.93305	-1.6186	48.0082	2.93464e-100	2.32683e-96	218.624
chr6:14758473	-5.77829	-0.624878	-48.0065	2.95057e-100	2.33539e-96	218.619
chr5:116944579	5.9611	-0.308232	48.0063	2.95215e-100	2.33539e-96	218.618
chr4:38805638	-5.92817	-1.34982	-48.0034	2.98065e-100	2.35526e-96	218.609
chr10:124036437	-5.38451	-0.765183	-48.0014	3.0007e-100	2.36842e-96	218.602
chr4:76984949	7.00634	-0.188171	47.9995	3.01858e-100	2.37983e-96	218.596
chr17:1095864	-6.24878	-0.276463	-47.9974	3.04016e-100	2.39413e-96	218.589
chr11:45926313	6.36085	-0.242134	47.9928	3.08646e-100	2.42784e-96	218.574
chr11:3340111	6.62366	0.137195	47.9922	3.09174e-100	2.42925e-96	218.573
chr15:39473129	6.74756	0.119634	47.9919	3.09522e-100	2.42925e-96	218.572
chr15:85343044	5.81159	0.0231098	47.9911	3.10308e-100	2.43267e-96	218.569
chr6:22877984	6.49695	0.0760366	47.9886	3.12845e-100	2.44981e-96	218.561
chr6:52512883	6.42183	0.327134	47.9799	3.21939e-100	2.51818e-96	218.533
chr19:3338805	-5.26671	-1.69701	-47.9779	3.24014e-100	2.53157e-96	218.526
chr1:64133226	5.60866	-0.709939	47.9745	3.27651e-100	2.55712e-96	218.515
chr7:85136159	6.24866	0.17811	47.968	3.34704e-100	2.60924e-96	218.494
chr11:78352423	6.40951	-0.146707	47.9673	3.35437e-100	2.61202e-96	218.492
chr15:39657945	6.28439	0.196829	47.9644	3.38715e-100	2.6346e-96	218.482
chr1:192879531	5.59549	-0.77872	47.9616	3.41769e-100	2.65539e-96	218.473
chr1:203557720	6.14354	-0.155427	47.9583	3.45508e-100	2.68145e-96	218.462
chr8:99705967	6.02732	-0.122927	47.9577	3.46158e-100	2.6835e-96	218.461
chr8:48620016	7.45268	-0.149024	47.9549	3.49418e-100	2.70576e-96	218.451
chr7:116355880	5.19524	-0.851524	47.9447	3.61329e-100	2.79489e-96	218.418
chr12:124716865	-5.65707	-0.520122	-47.9426	3.63823e-100	2.81105e-96	218.411
chr10:3046310	4.89817	0.289573	47.942	3.64486e-100	2.81305e-96	218.409
chr3:125124233	6.43085	-0.19689	47.9362	3.71463e-100	2.86373e-96	218.391
chr18:62979438	-5.21451	-1.86433	-47.9321	3.76528e-100	2.89847e-96	218.377
chr1:6743818	-5.8222	-1.03561	-47.9319	3.76803e-100	2.89847e-96	218.376
chr6:154247789	-5.8472	-0.405793	-47.9303	3.78694e-100	2.90805e-96	218.371
chr11:126991708	6.0111	0.164207	47.9302	3.78884e-100	2.90805e-96	218.371
chr13:29532919	6.54744	0.203598	47.9288	3.80582e-100	2.91688e-96	218.366
chr9:16344469	5.50317	-0.267805	47.9284	3.81081e-100	2.91688e-96	218.365
chr17:8608113	5.96951	0.726463	47.9283	3.8129e-100	2.91688e-96	218.365
chr12:51788975	6.80707	-0.0114634	47.9223	3.88826e-100	2.97126e-96	218.345
chr10:102658242	-6.11439	-0.285366	-47.921	3.90422e-100	2.98019e-96	218.341
chr8:22586882	6.93744	-0.0353049	47.92	3.91704e-100	2.9867e-96	218.338
chr16:72291323	6.17841	0.0965244	47.9149	3.98358e-100	3.03411e-96	218.321
chr14:76867821	-5.21744	-1.35445	-47.9103	4.04429e-100	3.07698e-96	218.306
chr5:90645216	5.68171	-0.306829	47.9083	4.07031e-100	3.0934e-96	218.3
chr7:101923588	7.26134	-0.0433537	47.9076	4.0808e-100	3.09799e-96	218.297
chr6:165637749	6.04671	0.113598	47.9066	4.09389e-100	3.10454e-96	218.294
chr11:16792133	6.10415	0.0157317	47.9061	4.10067e-100	3.1063e-96	218.292
chr2:59463652	6.32037	-0.50811	47.9046	4.12084e-100	3.11742e-96	218.288
chr12:10392538	-4.985	-1.47287	-47.9043	4.1243e-100	3.11742e-96	218.287
chr10:8064040	6.46768	0.278232	47.9038	4.13066e-100	3.11883e-96	218.285
chr5:157385484	6.28341	-0.420976	47.9022	4.15301e-100	3.13231e-96	218.28
chr18:24959322	6.89598	0.0642073	47.8993	4.19273e-100	3.15885e-96	218.27
chr6:3929217	5.86841	0.0194512	47.8962	4.23606e-100	3.18804e-96	218.26
chr2:111495764	6.28402	-0.366524	47.8937	4.27051e-100	3.2105e-96	218.252
chr10:8058804	7.00976	0.129634	47.8908	4.31164e-100	3.23792e-96	218.243
chr6:22878013	6.20585	-0.151098	47.8889	4.33759e-100	3.2539e-96	218.237
chr14:35365330	5.96427	-0.556768	47.888	4.35164e-100	3.25758e-96	218.233
chr8:127809848	5.74963	-0.0945732	47.8879	4.35186e-100	3.25758e-96	218.233
chr6:158653803	-6.11171	-0.477683	-47.8838	4.4112e-100	3.29846e-96	218.22
chr6:47529862	6.4361	0.224756	47.8808	4.45451e-100	3.32545e-96	218.21
chr2:235044090	-5.68098	0.556585	-47.8807	4.45685e-100	3.32545e-96	218.21
chr11:118978413	5.06122	1.11232	47.8783	4.4916e-100	3.34779e-96	218.202
chr8:42196180	5.72463	-0.840732	47.8779	4.49736e-100	3.3485e-96	218.201
chr2:144084577	6.63561	0.396341	47.8738	4.55933e-100	3.39101e-96	218.187
chr10:96665356	6.33037	0.322622	47.8734	4.56536e-100	3.39187e-96	218.186
chr6:131368649	-4.7139	-1.39354	-47.8692	4.62741e-100	3.43431e-96	218.172
chr1:13731060	-5.99878	-0.599024	-47.8689	4.63281e-100	3.43465e-96	218.171
chr10:45420652	-6.05012	-0.948841	-47.8635	4.71606e-100	3.49257e-96	218.154
chr11:68009106	-5.97939	-1.13079	-47.8631	4.72097e-100	3.49257e-96	218.153
chr5:168309311	4.99854	1.34732	47.8612	4.75068e-100	3.5082e-96	218.146
chr11:86559715	6.32695	0.129329	47.8611	4.75217e-100	3.5082e-96	218.146
chr3:14424899	-5.64805	-0.699024	-47.86	4.77063e-100	3.51809e-96	218.142
chr7:1811165	-5.93049	-0.438659	-47.8585	4.79333e-100	3.53109e-96	218.138
chr1:228739610	6.38451	-0.345793	47.8578	4.80423e-100	3.53539e-96	218.135
chr10:114633625	6.105	-0.836524	47.8564	4.82719e-100	3.54853e-96	218.131
chr16:17364570	-5.56268	-0.571829	-47.8545	4.85625e-100	3.56612e-96	218.125
chr8:71449054	5.94366	0.0528049	47.8537	4.87028e-100	3.57266e-96	218.122
chr6:11616417	6.4439	0.101585	47.8512	4.90921e-100	3.59742e-96	218.114
chr3:112653697	7.08646	0.0672561	47.8451	5.00888e-100	3.6666e-96	218.094
chr16:85847952	-5.60829	-1.35683	-47.8445	5.01833e-100	3.66966e-96	218.092
chr2:27799847	6.51427	0.12372	47.8439	5.02914e-100	3.67371e-96	218.09
chr5:128536400	6.91927	-0.401585	47.8368	5.14727e-100	3.75458e-96	218.067
chr2:169808377	6.84317	0.291951	47.8366	5.15063e-100	3.75458e-96	218.066
chr1:203557736	6.26146	0.02	47.8333	5.20674e-100	3.78749e-96	218.055
chr3:148723795	6.22683	0.231463	47.8332	5.20947e-100	3.78749e-96	218.055
chr3:54954288	6.51744	-0.275793	47.833	5.2121e-100	3.78749e-96	218.054
chr3:124986373	6.11329	-0.324695	47.8319	5.23129e-100	3.79747e-96	218.051
chr6:31711327	-4.64732	-0.995732	-47.8307	5.25159e-100	3.80824e-96	218.047
chr11:8835837	6.55939	-0.163963	47.8292	5.2774e-100	3.82296e-96	218.042
chr21:43369290	6.31659	-0.21061	47.8267	5.32184e-100	3.85115e-96	218.034
chr3:155081019	6.10402	-0.323476	47.8243	5.36342e-100	3.87721e-96	218.026
chr7:134940156	6.1839	0.180488	47.8166	5.50116e-100	3.97265e-96	218.001
chr13:73913398	6.30037	-0.748598	47.8093	5.63457e-100	4.06478e-96	217.977
chr12:14843842	6.5189	-0.184207	47.8088	5.64293e-100	4.0666e-96	217.976
chr10:3330745	5.88085	-0.658232	47.8037	5.73898e-100	4.13154e-96	217.959
chr11:78352379	5.75317	-0.196098	47.7992	5.8251e-100	4.18921e-96	217.944
chr21:42064169	-4.92268	-1.57585	-47.7988	5.83283e-100	4.19044e-96	217.943
chr15:70475303	-6.20866	-0.862866	-47.7939	5.92701e-100	4.25371e-96	217.927
chr3:130491611	6.27988	-0.347256	47.7921	5.96267e-100	4.27489e-96	217.921
chr15:79179049	6.90768	0.167378	47.7901	6.00109e-100	4.29801e-96	217.915
chr11:68142209	-6.29671	-0.709939	-47.7881	6.04144e-100	4.32247e-96	217.908
chr19:38538995	-5.35598	-0.948476	-47.7869	6.06542e-100	4.33517e-96	217.904
chr5:139670600	-6.24329	0.455183	-47.7859	6.08432e-100	4.34421e-96	217.901
chr17:847159	-6.88561	-0.689512	-47.7819	6.16602e-100	4.39804e-96	217.888
chr3:100534994	7.06951	0.090122	47.7795	6.21367e-100	4.42406e-96	217.88
chr10:8366520	6.57183	0.147622	47.7794	6.21522e-100	4.42406e-96	217.88
chr13:41614347	6.87646	-0.259085	47.779	6.22354e-100	4.42546e-96	217.878
chr6:63817893	6.4472	0.251037	47.7777	6.25004e-100	4.43977e-96	217.874
chr8:25179708	6.26866	0.100305	47.7774	6.25697e-100	4.44017e-96	217.873
chr10:109205974	6.16268	0.0906098	47.7706	6.39877e-100	4.53239e-96	217.851
chr17:63435268	-6.15402	-0.193598	-47.7705	6.39995e-100	4.53239e-96	217.851
chr14:68669837	5.4478	1.04305	47.7672	6.47032e-100	4.57757e-96	217.84
chr8:26404021	5.84598	-0.047622	47.7664	6.48655e-100	4.58113e-96	217.837
chr11:7512585	-5.42866	-1.36299	-47.7662	6.49266e-100	4.58113e-96	217.836
chr1:203557735	7.22488	-0.0518293	47.766	6.49509e-100	4.58113e-96	217.836
chr11:460490	7.13159	-0.148841	47.7614	6.59538e-100	4.64715e-96	217.821
chr3:111953263	6.13878	0.327805	47.7593	6.63971e-100	4.67366e-96	217.814
chr3:14424908	-6.56024	-0.258537	-47.7582	6.665e-100	4.68672e-96	217.81
chr14:76867903	-5.28841	-1.39226	-47.7551	6.73366e-100	4.73022e-96	217.8
chr9:134663156	6.56073	0.0618293	47.7547	6.74124e-100	4.73077e-96	217.799
chr3:8888194	6.03841	-0.097378	47.7451	6.95813e-100	4.87806e-96	217.768
chr6:42281822	-6.74012	0.0201829	-47.7377	7.12918e-100	4.99295e-96	217.744
chr9:134663132	6.21232	-0.426524	47.7365	7.15738e-100	5.00766e-96	217.74
chr6:53922899	6.31951	0.375488	47.7349	7.19504e-100	5.02895e-96	217.734
chr21:26405124	5.96207	0.374085	47.7308	7.29249e-100	5.089e-96	217.721
chr1:6743693	-5.47793	-1.4703	-47.7307	7.29558e-100	5.089e-96	217.721
chr8:104585932	-5.3189	-0.629207	-47.7254	7.4251e-100	5.17417e-96	217.703
chr5:115366628	6.13854	-0.29061	47.7115	7.77203e-100	5.41051e-96	217.658
chr14:54569283	7.21	-0.0896341	47.7111	7.78302e-100	5.41275e-96	217.657
chr7:98218262	-5.27037	-1.23372	-47.7105	7.79628e-100	5.41656e-96	217.655
chr7:4715743	-6.91183	-0.492134	-47.7078	7.86585e-100	5.45945e-96	217.646
chr18:70333978	6.25695	-0.248354	47.7059	7.91511e-100	5.48817e-96	217.64
chr1:175920602	5.53232	-0.6025	47.6964	8.1684e-100	5.65815e-96	217.609
chr16:70700255	-6.09415	-0.83378	-47.6923	8.27791e-100	5.72831e-96	217.595
chr6:52537342	-5.77098	0.123171	-47.691	8.31322e-100	5.74703e-96	217.591
chr2:235044084	-5.48402	0.163476	-47.6855	8.46628e-100	5.84704e-96	217.573
chr3:99862397	5.91585	0.70061	47.6818	8.56987e-100	5.91271e-96	217.561
chr3:71496381	6.93634	-0.219268	47.6785	8.66325e-100	5.97123e-96	217.55
chr14:32457647	6.72268	0.119512	47.6766	8.71719e-100	6.00246e-96	217.544
chr11:1307409	-7.38695	-0.478598	-47.6759	8.7378e-100	6.01071e-96	217.542
chr2:149411205	6.71585	0.133537	47.6742	8.78684e-100	6.03847e-96	217.536
chr8:118011784	5.84768	-0.344939	47.6727	8.82993e-100	6.0621e-96	217.531
chr2:232315736	-6.70427	-0.449939	-47.6692	8.93454e-100	6.12788e-96	217.52
chr2:111161051	6.69756	0.102073	47.665	9.05647e-100	6.20539e-96	217.506
chr11:121417437	-5.38427	-0.990061	-47.6645	9.07155e-100	6.20961e-96	217.504
chr1:151978117	6.05329	0.0885976	47.6624	9.13477e-100	6.24674e-96	217.498
chr7:112435238	6.45963	-0.0414024	47.6618	9.15491e-100	6.25437e-96	217.495
chr8:48654228	6.33951	-0.223171	47.6609	9.17992e-100	6.26531e-96	217.493
chr17:50197642	6.46402	-0.342988	47.6572	9.29483e-100	6.33752e-96	217.48
chr2:71925323	6.73488	0.0796341	47.6558	9.3359e-100	6.3593e-96	217.476
chr7:37259309	-5.48756	-0.687317	-47.6553	9.35206e-100	6.36408e-96	217.474
chr2:105240252	6.55098	0.0809756	47.6535	9.40669e-100	6.39475e-96	217.468
chr1:44801723	5.18183	-0.559207	47.6532	9.4155e-100	6.39475e-96	217.468
chr2:236715225	-6.04793	-0.575183	-47.6526	9.43445e-100	6.40137e-96	217.466
chr5:122390310	6.20549	0.588841	47.651	9.48516e-100	6.42951e-96	217.46
chr11:1307408	-6.74683	-0.730732	-47.6459	9.64752e-100	6.53321e-96	217.443
chr8:22542164	5.99951	-0.133049	47.6442	9.69993e-100	6.56232e-96	217.438
chr1:12133109	-4.25024	-1.7522	-47.6369	9.93644e-100	6.7158e-96	217.414
chr12:104596772	5.94683	0.486951	47.6325	1.00816e-99	6.80727e-96	217.4
chr10:3993231	6.48707	0.508415	47.6321	1.00962e-99	6.81054e-96	217.398
chr4:143348682	6.11268	-0.214756	47.6307	1.01427e-99	6.83531e-96	217.394
chr5:74720730	4.85963	1.34506	47.6262	1.02949e-99	6.93118e-96	217.379
chr22:35638492	6.91195	0.057439	47.6252	1.03256e-99	6.94513e-96	217.376
chr5:142432784	-5.59	-0.867317	-47.6233	1.03908e-99	6.98223e-96	217.37
chr2:9632563	6.14976	0.135854	47.6209	1.04738e-99	7.0312e-96	217.362
chr12:51820487	-5.65427	-1.41811	-47.6157	1.06573e-99	7.14749e-96	217.345
chr2:70095478	-6.52098	-0.0917073	-47.6072	1.09588e-99	7.34264e-96	217.317
chr11:45926318	6.59805	0.197805	47.603	1.11121e-99	7.43334e-96	217.303
chr9:136532555	-4.37256	-1.84762	-47.6029	1.11155e-99	7.43334e-96	217.303
chr1:224635595	6.48573	-0.155793	47.6024	1.1134e-99	7.43852e-96	217.301
chr22:35638523	6.97537	0.0381707	47.6021	1.11454e-99	7.43904e-96	217.3
chr4:52913861	6.3672	-0.00396341	47.601	1.11865e-99	7.4593e-96	217.297
chr17:81018467	-4.39902	-1.68988	-47.6003	1.12129e-99	7.46352e-96	217.294
chr10:33238308	6.77524	0.0760366	47.6002	1.12143e-99	7.46352e-96	217.294
chr13:75804221	6.3872	0.365183	47.5989	1.12619e-99	7.48802e-96	217.29
chr2:235940466	6.47585	-0.288415	47.591	1.15587e-99	7.67809e-96	217.264
chr16:17364663	-5.30598	-0.892866	-47.5894	1.16217e-99	7.71254e-96	217.259
chr2:227871005	7.06	0.0097561	47.5887	1.16475e-99	7.72233e-96	217.256
chr8:22587064	7.13402	-0.218598	47.5871	1.17093e-99	7.75591e-96	217.251
chr5:157385485	6.13744	-0.501524	47.5844	1.18132e-99	7.81725e-96	217.242
chr14:76867681	-5.05098	-1.38683	-47.5811	1.19452e-99	7.8971e-96	217.231
chr8:48654216	6.70488	0.367195	47.5798	1.1997e-99	7.92386e-96	217.227
chr4:67575454	-5.83549	-0.639451	-47.5752	1.21797e-99	8.0369e-96	217.212
chr8:48620058	7.13293	-0.0629268	47.5736	1.22417e-99	8.07016e-96	217.207
chr2:231153300	6.22683	0.32122	47.5734	1.22534e-99	8.07023e-96	217.206
chr1:63918273	6.1861	-0.0665854	47.5706	1.23662e-99	8.13683e-96	217.197
chr11:104134915	4.8428	-1.13713	47.5686	1.24452e-99	8.18107e-96	217.191
chr22:46374547	-6.1428	-1.20323	-47.567	1.25111e-99	8.21665e-96	217.185
chr16:68823513	6.32402	-0.0907927	47.5609	1.27676e-99	8.37716e-96	217.165
chr8:80301302	7.16146	0.0521951	47.5603	1.2791e-99	8.38462e-96	217.163
chr1:231636302	6.44415	-0.316951	47.5565	1.29559e-99	8.48476e-96	217.151
chr1:167796955	6.67268	0.264268	47.5508	1.32003e-99	8.62891e-96	217.132
chr3:86996418	6.6028	-0.0860366	47.5508	1.32008e-99	8.62891e-96	217.132
chr13:111282244	-5.61415	0.380854	-47.5488	1.32896e-99	8.67879e-96	217.126
chr2:159202915	6.50073	-0.189512	47.5424	1.35709e-99	8.84814e-96	217.105
chr15:59295318	6.07073	0.15878	47.5423	1.35744e-99	8.84814e-96	217.104
chr10:110500927	6.10098	-0.418659	47.5409	1.36379e-99	8.88127e-96	217.1
chr1:173393308	7.44817	-0.0532317	47.5378	1.37772e-99	8.96358e-96	217.09
chr7:130488578	6.31427	0.0157927	47.5372	1.38058e-99	8.97382e-96	217.088
chr4:41538097	5.39012	-0.605549	47.5368	1.38243e-99	8.97742e-96	217.086
chr8:121801302	6.38439	0.219146	47.5351	1.39043e-99	9.02095e-96	217.081
chr5:65808456	5.8661	0.22061	47.5338	1.39603e-99	9.04889e-96	217.077
chr1:12496800	6.90061	-0.0667683	47.5332	1.3992e-99	9.06101e-96	217.074
chr16:85295443	6.79439	0.221585	47.5314	1.40751e-99	9.10632e-96	217.069
chr15:85543897	-5.19744	-1.03079	-47.53	1.41401e-99	9.13987e-96	217.064
chr10:75508730	5.28976	-1.30744	47.5295	1.4161e-99	9.14489e-96	217.063
chr3:106119903	5.92598	-0.459329	47.5272	1.42684e-99	9.20574e-96	217.055
chr5:180213149	-5.02988	-1.30665	-47.5248	1.43858e-99	9.27229e-96	217.047
chr10:124341132	-5.21549	-1.4675	-47.5245	1.43982e-99	9.27229e-96	217.046
chr2:174026121	6.80756	0.376463	47.5198	1.46249e-99	9.40955e-96	217.031
chr8:48620015	6.71659	-0.175732	47.5189	1.46648e-99	9.4265e-96	217.028
chr15:71323617	4.3828	-1.36409	47.5187	1.46783e-99	9.42652e-96	217.027
chr2:36489392	6.13195	0.055122	47.5151	1.48528e-99	9.5298e-96	217.015
chr16:70700223	-6.23341	-0.330366	-47.5147	1.4874e-99	9.53461e-96	217.014
chr2:173264779	-5.62268	-0.155488	-47.5142	1.48954e-99	9.53951e-96	217.012
chr15:101711061	7.0872	-0.172134	47.5098	1.51132e-99	9.67009e-96	216.998
chr13:44348341	6.5422	0.12	47.5075	1.52305e-99	9.73623e-96	216.99
chr16:84874605	6.76598	-0.0943293	47.5065	1.52816e-99	9.75992e-96	216.987
chr12:47302240	6.62159	0.137622	47.5057	1.53203e-99	9.77566e-96	216.984
chr10:124559343	6.72098	0.224878	47.5008	1.55697e-99	9.92571e-96	216.968
chr7:30931738	7.28659	0.0347561	47.5005	1.55871e-99	9.9277e-96	216.967
chr6:163750958	-6.32976	-0.283415	-47.499	1.56628e-99	9.96681e-96	216.962
chr1:55375206	6.22671	0.152134	47.4952	1.58638e-99	1.00855e-95	216.95
chr5:78700228	5.90744	0.481768	47.4945	1.59e-99	1.00993e-95	216.948
chr4:109980435	6.18317	-0.312195	47.49	1.61374e-99	1.02407e-95	216.933
chr7:4715413	-5.74488	-0.813171	-47.4888	1.6198e-99	1.02646e-95	216.929
chr21:42064170	-4.23451	-1.50287	-47.4887	1.62044e-99	1.02646e-95	216.929
chr7:157302531	-6.2028	-0.429817	-47.4882	1.62307e-99	1.02718e-95	216.927
chr15:55373037	-5.19927	-0.33061	-47.4873	1.6283e-99	1.02956e-95	216.924
chr13:41614473	6.67	-0.0734146	47.4813	1.66046e-99	1.04894e-95	216.905
chr5:34688162	6.85244	0.300854	47.4792	1.67215e-99	1.05537e-95	216.898
chr9:134661849	7.04951	0.0758537	47.4777	1.68044e-99	1.05889e-95	216.893
chr6:109172301	6.01793	0.0156707	47.4777	1.68077e-99	1.05889e-95	216.892
chr10:8064072	6.40256	0.351037	47.4749	1.69643e-99	1.06779e-95	216.883
chr15:71251723	6.40256	0.32189	47.4711	1.7179e-99	1.08032e-95	216.871
chr2:224014477	6.01378	0.452012	47.47	1.72404e-99	1.08321e-95	216.867
chr5:67267144	6.97073	0.207439	47.4686	1.73189e-99	1.08716e-95	216.863
chr7:102045420	-5.07646	-1.57665	-47.4682	1.73439e-99	1.08775e-95	216.861
chr20:32205192	-4.37305	-0.953963	-47.4678	1.73641e-99	1.08803e-95	216.86
chr1:2174997	-5.18098	0.110488	-47.4673	1.73925e-99	1.08883e-95	216.858
chr10:8058592	6.66122	-0.070122	47.466	1.74692e-99	1.09265e-95	216.854
chr22:43011499	5.74634	0.211585	47.4625	1.76746e-99	1.10451e-95	216.843
chr8:22586761	6.79683	-0.315	47.4556	1.80777e-99	1.12868e-95	216.82
chr3:73385663	5.15268	0.31878	47.4526	1.82589e-99	1.13897e-95	216.81
chr8:60792700	-4.44634	-1.4028	-47.4493	1.84613e-99	1.15031e-95	216.799
chr10:119253547	6.19354	-0.316524	47.449	1.84791e-99	1.15031e-95	216.798
chr14:88630889	5.64927	-0.144024	47.4488	1.84901e-99	1.15031e-95	216.798
chr13:41614371	6.83598	-0.25128	47.4485	1.85095e-99	1.15048e-95	216.797
chr9:92151617	6.52329	0.367988	47.4469	1.86059e-99	1.15519e-95	216.792
chr13:97004828	6.96427	0.0179878	47.4467	1.86183e-99	1.15519e-95	216.791
chr15:36428213	6.14171	-0.304024	47.4456	1.86854e-99	1.15831e-95	216.787
chr11:9566836	5.66561	-0.195976	47.4414	1.89504e-99	1.1737e-95	216.773
chr5:39533955	6.3861	-0.214146	47.4388	1.91124e-99	1.18184e-95	216.765
chr2:63486977	-4.82256	-1.02555	-47.4388	1.91158e-99	1.18184e-95	216.765
chr5:78677937	6.35915	-0.114207	47.4385	1.91344e-99	1.18194e-95	216.764
chr16:84874595	7.1078	0.0990244	47.4377	1.91816e-99	1.1838e-95	216.761
chr2:36516277	6.17854	0.107683	47.4348	1.93682e-99	1.19426e-95	216.752
chr9:115054933	6.30963	-0.0533537	47.431	1.96149e-99	1.2084e-95	216.739
chr13:20476017	-5.96573	-0.569695	-47.4283	1.97919e-99	1.21823e-95	216.73
chr8:80301324	6.9478	0.0903659	47.4278	1.98212e-99	1.21895e-95	216.729
chr15:68206427	-5.93085	-0.138476	-47.4273	1.98559e-99	1.21924e-95	216.727
chr4:7022450	6.43585	-0.147073	47.4272	1.98609e-99	1.21924e-95	216.727
chr10:13709392	5.15988	1.03335	47.4262	1.9926e-99	1.22216e-95	216.724
chr3:111952978	5.48634	0.899756	47.4257	1.9958e-99	1.22305e-95	216.722
chr7:151436900	6.05561	0.289756	47.4231	2.01318e-99	1.23261e-95	216.713
chr3:111861733	6.08037	-0.130061	47.4198	2.03539e-99	1.24512e-95	216.702
chr2:151522063	6.32207	0.237012	47.4154	2.06503e-99	1.26214e-95	216.688
chr20:19934876	-4.99415	-0.952195	-47.4143	2.07275e-99	1.26574e-95	216.684
chr17:77323644	6.12524	-0.475305	47.4096	2.10533e-99	1.28451e-95	216.669
chr3:136070551	5.48085	-0.62189	47.408	2.11655e-99	1.29023e-95	216.664
chr1:12496792	6.57695	-0.0542073	47.406	2.13056e-99	1.29763e-95	216.657
chr11:13687447	6.72585	0.0637805	47.3989	2.18125e-99	1.32734e-95	216.634
chr6:148267828	6.61671	0.0548171	47.397	2.1947e-99	1.33436e-95	216.628
chr22:44689232	6.14768	0.159817	47.3932	2.22274e-99	1.35023e-95	216.615
chr7:30931691	7.13122	0.0826829	47.3926	2.22687e-99	1.35156e-95	216.613
chr7:112261122	6.4561	0.0120732	47.3894	2.25061e-99	1.36439e-95	216.603
chr8:8572997	5.92976	0.149512	47.3892	2.25193e-99	1.36439e-95	216.602
chr2:112150608	6.05878	-0.132927	47.3888	2.25497e-99	1.36474e-95	216.601
chr1:59043910	5.39976	-1.37122	47.3886	2.25642e-99	1.36474e-95	216.6
chr2:36489402	6.2989	0.0807927	47.3858	2.27748e-99	1.37628e-95	216.591
chr19:16957135	-5.11756	-1.25049	-47.3844	2.2884e-99	1.38168e-95	216.586
chr4:169664886	-5.45049	-0.620122	-47.384	2.29165e-99	1.38244e-95	216.585
chr3:177744911	5.77854	0.116463	47.3821	2.30605e-99	1.38992e-95	216.579
chr13:29862102	5.81317	-0.0323171	47.3784	2.33405e-99	1.4055e-95	216.567
chr17:62718563	6.13512	-0.109878	47.378	2.33745e-99	1.4055e-95	216.565
chr2:215869539	5.47707	0.626707	47.3779	2.33795e-99	1.4055e-95	216.565
chr6:152381525	6.71866	-0.0593293	47.3768	2.34643e-99	1.40938e-95	216.561
chr3:127536731	-4.3761	-1.16524	-47.375	2.36048e-99	1.41659e-95	216.555
chr9:134663103	6.35402	0.252012	47.3746	2.36415e-99	1.41758e-95	216.554
chr17:74443043	-5.77927	-0.755854	-47.3724	2.38118e-99	1.42656e-95	216.547
chr14:76867766	-6.13927	-1.40768	-47.3711	2.39121e-99	1.43133e-95	216.543
chr7:157302532	-6.55829	-0.614878	-47.3646	2.44355e-99	1.46141e-95	216.521
chr3:14424898	-6.27341	-0.79378	-47.3629	2.45745e-99	1.46846e-95	216.515
chr4:98780294	6.57329	0.153841	47.3605	2.47657e-99	1.47862e-95	216.508
chr5:56447421	6.36073	0.188902	47.3587	2.49127e-99	1.48612e-95	216.502
chr10:124341193	-4.12476	-1.8975	-47.3578	2.49905e-99	1.48827e-95	216.499
chr7:30931699	7.13732	0.0347561	47.3578	2.49916e-99	1.48827e-95	216.499
chr21:44990163	5.43085	-0.0146951	47.3575	2.5015e-99	1.48839e-95	216.498
chr21:31336088	6.5061	-0.00365854	47.3535	2.53476e-99	1.5069e-95	216.485
chr16:3657045	6.34037	0.110183	47.3476	2.5848e-99	1.53534e-95	216.465
chr2:215843951	6.89976	0.274146	47.3447	2.60988e-99	1.54891e-95	216.456
chr7:48391159	-5.98854	-0.66622	-47.3412	2.64032e-99	1.56564e-95	216.444
chr3:123790128	6.33159	-0.0203049	47.34	2.65078e-99	1.56954e-95	216.44
chr11:116853890	-5.93366	-0.156829	-47.3399	2.6514e-99	1.56954e-95	216.44
chr20:58306621	-5.73829	-0.817073	-47.3379	2.66937e-99	1.57883e-95	216.433
chr1:2290843	-5.86585	-1.05927	-47.3357	2.68887e-99	1.58902e-95	216.426
chr2:67260597	6.15561	-0.127439	47.3351	2.69463e-99	1.59107e-95	216.424
chr16:81559027	-5.69744	-0.634451	-47.3348	2.69693e-99	1.59108e-95	216.423
chr16:85004958	6.52537	-0.0526829	47.3318	2.72357e-99	1.60515e-95	216.413
chr11:1307287	-5.43646	-0.914329	-47.3316	2.7254e-99	1.60515e-95	216.413
chr2:174025978	6.67098	0.344146	47.328	2.75822e-99	1.62311e-95	216.401
chr1:206558163	-6.75537	-0.296341	-47.3234	2.80095e-99	1.64686e-95	216.386
chr16:72291324	6.4489	0.0654268	47.3228	2.80603e-99	1.64846e-95	216.384
chr2:145023054	5.07744	-1.05628	47.3215	2.81875e-99	1.65454e-95	216.379
chr1:84302012	-4.76671	-1.07177	-47.3181	2.8507e-99	1.67188e-95	216.368
chr9:124290426	-5.12585	-0.726341	-47.3121	2.90782e-99	1.70276e-95	216.348
chr22:25400854	-6.11439	-0.950854	-47.3121	2.90824e-99	1.70276e-95	216.348
chr13:94950480	6.14378	-0.196646	47.3094	2.93404e-99	1.71642e-95	216.339
chr1:2127355	-6.01598	-0.6075	-47.3088	2.93999e-99	1.71845e-95	216.337
chr2:87454937	5.36317	0.130732	47.3078	2.94953e-99	1.72258e-95	216.334
chr6:38574127	5.76488	0.698049	47.3075	2.95259e-99	1.72292e-95	216.333
chr8:105321705	5.81037	0.268232	47.3072	2.95547e-99	1.72316e-95	216.332
chr1:3171112	-5.23707	-1.24159	-47.3056	2.97148e-99	1.73013e-95	216.327
chr6:166619592	6.36402	-0.230305	47.3055	2.9724e-99	1.73013e-95	216.327
chr16:8860145	5.59988	0.0939634	47.3048	2.97877e-99	1.73239e-95	216.324
chr11:65916203	5.15171	-0.981951	47.3043	2.98423e-99	1.73412e-95	216.323
chr21:32022369	-5.7389	-0.782378	-47.3027	2.9994e-99	1.74148e-95	216.318
chr8:130233075	6.29756	0.111098	47.3012	3.01505e-99	1.74911e-95	216.312
chr8:134720673	-6.13159	-1.0764	-47.3008	3.01869e-99	1.74977e-95	216.311
chr3:174274919	6.87671	0.0940854	47.2981	3.04642e-99	1.76437e-95	216.302
chr3:123790129	6.45695	0.12189	47.2972	3.0548e-99	1.76775e-95	216.299
chr1:91731973	-5.74049	-1.05817	-47.2949	3.07893e-99	1.78023e-95	216.292
chr11:9838474	6.74256	0.0792073	47.2938	3.09019e-99	1.78526e-95	216.288
chr2:160271398	7.28768	0.171768	47.2913	3.11593e-99	1.79864e-95	216.28
chr10:13484235	-5.73122	0.342927	-47.2857	3.17336e-99	1.83027e-95	216.262
chr2:37626480	-5.19902	0.170854	-47.2853	3.17829e-99	1.8316e-95	216.26
chr7:30169538	6.53951	-0.18622	47.2827	3.20521e-99	1.84558e-95	216.252
chr13:32824195	6.65537	0.0446341	47.2823	3.21011e-99	1.84688e-95	216.25
chr4:67727983	6.23659	0.299634	47.2792	3.24348e-99	1.86454e-95	216.24
chr1:64879030	6.80159	0.361402	47.2781	3.25504e-99	1.86918e-95	216.236
chr7:46144765	5.92378	-0.00567073	47.2779	3.25693e-99	1.86918e-95	216.236
chr3:148723823	5.95927	0.31878	47.2728	3.3124e-99	1.89945e-95	216.219
chr8:22586911	6.88378	0.0442073	47.2697	3.34682e-99	1.91761e-95	216.209
chr1:147761001	6.34305	-0.103963	47.2642	3.40852e-99	1.95135e-95	216.191
chr3:54901522	6.94293	0.10439	47.2635	3.41606e-99	1.95407e-95	216.188
chr8:141266336	-5.34878	-0.356098	-47.2615	3.43903e-99	1.96559e-95	216.182
chr10:8366627	7.17171	0.110244	47.261	3.44521e-99	1.9675e-95	216.18
chr3:54901523	6.4722	0.0181707	47.2584	3.47499e-99	1.98289e-95	216.172
chr5:147404639	6.65476	-0.317622	47.2573	3.48767e-99	1.98849e-95	216.168
chr7:95609014	4.50793	-2.06384	47.257	3.49102e-99	1.98877e-95	216.167
chr8:22586689	6.96268	0.127439	47.2566	3.4957e-99	1.98981e-95	216.166
chr7:157310108	6.60744	-0.0812805	47.252	3.54884e-99	2.01841e-95	216.151
chr7:29488963	5.83939	-0.0245732	47.2489	3.58667e-99	2.03826e-95	216.14
chr1:154419649	-4.25415	-1.94768	-47.247	3.60939e-99	2.0495e-95	216.134
chr1:12496793	6.64329	-0.150793	47.2461	3.61956e-99	2.0536e-95	216.131
chr1:175221448	6.38646	-0.0104268	47.2443	3.64144e-99	2.06432e-95	216.125
chr10:110501109	5.83744	-0.627378	47.242	3.66909e-99	2.07831e-95	216.118
chr11:120541106	5.70634	0.382073	47.2326	3.7861e-99	2.14284e-95	216.086
chr4:150212378	6.33134	-0.155061	47.2323	3.78918e-99	2.14285e-95	216.086
chr20:5028944	6.68988	0.333841	47.2283	3.84045e-99	2.17008e-95	216.072
chr10:114322676	6.30012	-0.0470122	47.2256	3.87453e-99	2.18756e-95	216.063
chr10:116893351	-6.14524	-0.0956707	-47.2253	3.87884e-99	2.18822e-95	216.062
chr11:3340186	6.20537	-0.668049	47.2234	3.90342e-99	2.2003e-95	216.056
chr7:11604687	5.46207	0.45628	47.2216	3.9266e-99	2.21158e-95	216.05
chr12:121240727	-5.11976	-1.6672	-47.2206	3.93883e-99	2.21532e-95	216.047
chr17:40547513	-5.92159	-0.262988	-47.2204	3.9418e-99	2.21532e-95	216.046
chr3:38270841	4.47244	1.2372	47.2203	3.9428e-99	2.21532e-95	216.046
chr10:8366521	6.64232	0.0693293	47.2182	3.9711e-99	2.22802e-95	216.039
chr10:50396977	6.50061	0.155793	47.2181	3.9718e-99	2.22802e-95	216.039
chr3:12508597	6.18976	0.0258537	47.2165	3.99294e-99	2.23807e-95	216.034
chr11:7512565	-5.29073	-0.561951	-47.2161	3.99917e-99	2.23977e-95	216.032
chr7:115015762	6.74402	0.0384756	47.2139	4.02822e-99	2.25422e-95	216.025
chr3:130491572	6.89537	-0.134512	47.2123	4.05013e-99	2.26466e-95	216.019
chr12:31789855	6.54183	-0.167744	47.2119	4.05545e-99	2.26582e-95	216.018
chr2:232315747	-6.52488	-0.560732	-47.2113	4.06288e-99	2.26815e-95	216.016
chr6:16337664	6.25915	0.332866	47.2076	4.11284e-99	2.2932e-95	216.004
chr5:174608743	-6.48695	-0.490183	-47.2075	4.11434e-99	2.2932e-95	216.004
chr11:65916160	5.07134	-1.42323	47.2055	4.14172e-99	2.30661e-95	215.997
chr8:23507859	6.06061	0.104085	47.2048	4.15142e-99	2.31017e-95	215.995
chr14:96274770	6.38927	-0.26061	47.2028	4.17889e-99	2.32359e-95	215.988
chr20:18705666	6.75098	0.037561	47.1997	4.22317e-99	2.346e-95	215.978
chr4:4555985	6.6928	0.0833537	47.1995	4.22592e-99	2.346e-95	215.977
chr12:123268258	-4.9611	-1.05518	-47.1986	4.23802e-99	2.35084e-95	215.974
chr10:116947426	5.81	-0.325488	47.1984	4.2416e-99	2.35095e-95	215.974
chr11:1755611	-5.6572	-0.43628	-47.1973	4.25701e-99	2.35762e-95	215.97
chr20:38166531	6.24866	-0.0765244	47.1958	4.27711e-99	2.36686e-95	215.965
chr16:4053430	-4.89902	-1.55976	-47.1932	4.3154e-99	2.38616e-95	215.957
chr8:80301271	6.83037	0.0551829	47.1909	4.34753e-99	2.40201e-95	215.949
chr21:44912288	-5.18329	-1.35396	-47.1895	4.36787e-99	2.41134e-95	215.945
chr14:68620293	6.45488	0.00695122	47.1885	4.38216e-99	2.41731e-95	215.941
chr14:22509210	5.91232	0.694085	47.1879	4.39195e-99	2.41936e-95	215.939
chr15:71334041	5.56085	-0.377866	47.1878	4.39282e-99	2.41936e-95	215.939
chr7:24936237	5.65683	-0.0210976	47.1862	4.41594e-99	2.42827e-95	215.934
chr12:116371103	6.72378	0.107378	47.1862	4.41597e-99	2.42827e-95	215.934
chr5:129973979	6.19085	0.0334756	47.1826	4.46953e-99	2.45578e-95	215.922
chr8:48620038	7.28805	-0.16378	47.1816	4.48386e-99	2.46171e-95	215.918
chr1:223761207	6.31524	0.501159	47.1809	4.49493e-99	2.46584e-95	215.916
chr13:77176554	5.94402	0.210793	47.1776	4.54387e-99	2.49073e-95	215.905
chr15:80953524	6.78305	0.36372	47.1772	4.55021e-99	2.49224e-95	215.904
chr1:16018482	6.26049	0.548293	47.1752	4.58089e-99	2.50707e-95	215.897
chr2:241269028	5.87878	-0.161463	47.1732	4.611e-99	2.52138e-95	215.891
chr6:139437256	5.86049	0.212439	47.173	4.61428e-99	2.52138e-95	215.89
chr14:58752921	-5.16963	-0.619939	-47.1719	4.63124e-99	2.52866e-95	215.886
chr2:227871095	6.75634	0.126098	47.1707	4.65008e-99	2.53628e-95	215.882
chr2:174025804	6.34659	0.228171	47.1705	4.65248e-99	2.53628e-95	215.882
chr10:30057980	6.00695	0.326037	47.17	4.66078e-99	2.53882e-95	215.88
chr8:41236072	5.89878	-0.281098	47.1692	4.67388e-99	2.54198e-95	215.877
chr1:224635601	6.96317	0.0982927	47.1691	4.67389e-99	2.54198e-95	215.877
chr15:58547343	6.72854	-0.0740244	47.1654	4.73173e-99	2.56953e-95	215.865
chr1:224213011	6.88232	0.027378	47.1654	4.73192e-99	2.56953e-95	215.865
chr5:34688000	6.66049	-0.0453659	47.1651	4.73709e-99	2.57033e-95	215.864
chr14:91124558	-6.13061	-0.0303049	-47.1642	4.75195e-99	2.57639e-95	215.861
chr2:67389616	5.68939	-0.652866	47.1623	4.78096e-99	2.5901e-95	215.855
chr3:66047675	5.42085	-0.197378	47.1619	4.7883e-99	2.59205e-95	215.853
chr2:63052510	-5.2228	-1.06165	-47.1613	4.79709e-99	2.59479e-95	215.851
chr2:174025967	6.94902	0.173415	47.16	4.81788e-99	2.60402e-95	215.847
chr7:2761353	6.55378	0.465671	47.1591	4.83286e-99	2.61009e-95	215.844
chr18:74929245	5.89305	0.0628659	47.1583	4.84628e-99	2.61531e-95	215.841
chr1:224635607	6.94939	0.12628	47.1562	4.87954e-99	2.63098e-95	215.835
chr11:460473	7.21744	0.0292073	47.156	4.88287e-99	2.63098e-95	215.834
chr22:35638454	5.7611	0.738598	47.1549	4.90105e-99	2.63873e-95	215.83
chr2:174026127	6.52976	-0.00585366	47.1544	4.90803e-99	2.64044e-95	215.829
chr16:82059788	6.20854	-0.240122	47.1536	4.92196e-99	2.64589e-95	215.826
chr3:140529407	5.9411	-0.137622	47.1477	5.01953e-99	2.69626e-95	215.806
chr6:157109114	6.38841	0.122256	47.1441	5.07965e-99	2.72645e-95	215.795
chr8:37874546	6.24744	-0.216159	47.1429	5.10042e-99	2.73549e-95	215.791
chr3:177934706	6.46561	-0.0758537	47.1388	5.16955e-99	2.77001e-95	215.777
chr2:174026084	6.66573	-0.188232	47.1387	5.17274e-99	2.77001e-95	215.777
chr3:9884794	5.78598	-0.468841	47.1295	5.33271e-99	2.85348e-95	215.746
chr11:130847734	6.59817	-0.236402	47.1289	5.34322e-99	2.85691e-95	215.744
chr3:119418436	6.61744	-0.0412805	47.1273	5.37171e-99	2.86993e-95	215.739
chr15:85543863	-4.69463	-1.47512	-47.126	5.39546e-99	2.88041e-95	215.735
chr5:171863968	6.44049	-0.0779268	47.1223	5.46171e-99	2.91354e-95	215.723
chr6:44238319	5.4528	-0.792134	47.1193	5.51601e-99	2.94026e-95	215.713
chr4:168483888	5.76012	0.27372	47.1178	5.54507e-99	2.95349e-95	215.708
chr4:76985632	6.1022	0.0926829	47.1162	5.57373e-99	2.96648e-95	215.703
chr5:171863969	6.48402	0.119695	47.1146	5.60356e-99	2.98008e-95	215.697
chr1:179029520	5.96451	-0.184695	47.1136	5.62147e-99	2.98636e-95	215.694
chr7:116355909	5.48854	0.228659	47.1135	5.62395e-99	2.98636e-95	215.694
chr7:37259818	-5.8222	-0.567927	-47.1113	5.6655e-99	3.00613e-95	215.686
chr10:30058484	6.60305	-0.113963	47.1107	5.67745e-99	3.01018e-95	215.684
chr2:1055549	6.25866	-0.438476	47.1085	5.71875e-99	3.02977e-95	215.677
chr15:39235095	5.79378	0.0877439	47.1015	5.85366e-99	3.09785e-95	215.654
chr22:46374602	-6.10976	-0.946707	-47.1014	5.85615e-99	3.09785e-95	215.653
chr18:62450799	-6.20476	-0.128354	-47.1	5.88185e-99	3.10908e-95	215.649
chr7:135651033	5.84366	-0.0132927	47.0902	6.07725e-99	3.20993e-95	215.617
chr9:87713846	5.01732	-0.705976	47.0885	6.11237e-99	3.22603e-95	215.611
chr6:111277202	6.07829	0.48561	47.0829	6.22778e-99	3.28446e-95	215.592
chr7:28055321	5.50646	0.264451	47.0819	6.24701e-99	3.2921e-95	215.589
chr12:114700778	-5.62866	-0.912256	-47.0706	6.48688e-99	3.41452e-95	215.552
chr1:12496816	6.70756	-0.169512	47.0705	6.48913e-99	3.41452e-95	215.552
chr12:91108470	6.28463	-0.347317	47.069	6.52283e-99	3.42967e-95	215.546
chr4:40196984	-4.97549	-0.842866	-47.0687	6.52782e-99	3.4297e-95	215.546
chr5:124639457	6.02439	0.657317	47.0673	6.56031e-99	3.44417e-95	215.541
chr10:13729465	6.72061	0.269817	47.0666	6.57459e-99	3.44906e-95	215.539
chr6:139748592	5.91878	-0.160488	47.063	6.65299e-99	3.48757e-95	215.527
chr18:62979416	-6.65232	-0.752866	-47.0604	6.71069e-99	3.51517e-95	215.518
chr3:55668464	5.67293	0.0537805	47.0598	6.7254e-99	3.52022e-95	215.516
chr9:134661845	6.66268	-0.239146	47.0528	6.88369e-99	3.60037e-95	215.493
chr20:43677287	5.97463	0.699634	47.0504	6.93979e-99	3.62699e-95	215.485
chr9:116238585	6.1028	-0.279573	47.05	6.94942e-99	3.62929e-95	215.484
chr1:203557424	6.43366	0.178902	47.0496	6.95772e-99	3.63091e-95	215.482
chr1:224635606	6.47988	-0.190061	47.047	7.01755e-99	3.65939e-95	215.474
chr20:50111442	5.00671	-1.54848	47.0429	7.11441e-99	3.70711e-95	215.46
chr8:118011816	6.50439	-0.0395122	47.0421	7.13373e-99	3.7144e-95	215.458
chr2:111495802	5.60524	-0.654695	47.0414	7.1508e-99	3.72051e-95	215.455
chr22:45226922	-5.53927	-1.36744	-47.0374	7.24527e-99	3.76685e-95	215.442
chr19:54210071	-5.36829	-1.41829	-47.0358	7.28452e-99	3.78426e-95	215.437
chr6:81834448	6.2539	-0.332683	47.0356	7.28964e-99	3.78426e-95	215.436
chr22:35638493	6.57451	-0.0481098	47.0347	7.31132e-99	3.79269e-95	215.433
chr5:13428122	5.04732	0.933171	47.0337	7.33593e-99	3.80262e-95	215.43
chr8:22586687	6.36561	0.621341	47.0296	7.43635e-99	3.85181e-95	215.416
chr12:116371121	6.57988	0.0927439	47.027	7.50117e-99	3.88249e-95	215.408
chr16:85847918	-6.33537	-0.963902	-47.026	7.52777e-99	3.89336e-95	215.404
chr1:12496801	6.8728	-0.147744	47.0252	7.54746e-99	3.90065e-95	215.402
chr10:102752765	6.49024	0.0107317	47.0243	7.56953e-99	3.90738e-95	215.399
chr8:80301301	6.45866	-0.139329	47.0242	7.57171e-99	3.90738e-95	215.398
chr3:134315711	6.76171	-0.165366	47.0216	7.63928e-99	3.9382e-95	215.39
chr1:203154034	5.54463	-0.739512	47.0213	7.64689e-99	3.9382e-95	215.389
chr11:30741380	5.79902	0.201829	47.0212	7.64841e-99	3.9382e-95	215.388
chr8:22443734	5.30829	-0.769024	47.0203	7.6714e-99	3.94712e-95	215.385
chr1:160911920	6.73878	0.125244	47.02	7.67928e-99	3.94826e-95	215.384
chr2:85516785	-5.75171	-1.15012	-47.0131	7.85672e-99	4.03651e-95	215.362
chr15:59296423	6.37329	-0.112988	47.0114	7.9036e-99	4.0576e-95	215.356
chr14:75280628	6.87	0.299268	47.0103	7.93028e-99	4.06829e-95	215.352
chr1:223180904	-5.43561	-0.340732	-47.0087	7.97455e-99	4.08799e-95	215.347
chr6:52512941	6.08805	-0.00329268	47.0004	8.19634e-99	4.1986e-95	215.32
chr3:55668500	5.58354	0.738476	46.9996	8.21845e-99	4.20376e-95	215.317
chr7:78716949	6.01451	-0.0216463	46.9996	8.21848e-99	4.20376e-95	215.317
chr2:214753154	6.4839	0.28	46.9937	8.3814e-99	4.2828e-95	215.298
chr2:227871074	6.39	0.130976	46.9936	8.38533e-99	4.2828e-95	215.297
chr16:85848046	-5.45524	-1.24372	-46.9899	8.48997e-99	4.33307e-95	215.285
chr2:231180152	-5.74561	-1.23622	-46.9868	8.57754e-99	4.37455e-95	215.275
chr15:73686777	6.07451	-0.705915	46.982	8.71517e-99	4.44149e-95	215.259
chr3:171712382	5.90061	-0.438476	46.9804	8.76227e-99	4.46223e-95	215.253
chr17:64231971	6.87963	0.110915	46.9801	8.77104e-99	4.46343e-95	215.252
chr11:78352426	6.16512	-0.213659	46.9791	8.80238e-99	4.47611e-95	215.249
chr18:26323076	6.25634	0.0137805	46.9763	8.88372e-99	4.51417e-95	215.24
chr9:84297385	5.88439	0.111341	46.9753	8.91228e-99	4.52538e-95	215.237
chr17:40332515	-4.95463	-0.729146	-46.9748	8.92735e-99	4.52973e-95	215.235
chr1:178451599	6.46939	0.0254268	46.9719	9.01627e-99	4.57152e-95	215.225
chr2:208130412	6.53207	0.0195732	46.9708	9.04833e-99	4.58443e-95	215.222
chr5:34688029	6.04402	-0.000914634	46.962	9.31631e-99	4.71677e-95	215.193
chr7:30169518	6.31268	-0.311098	46.9525	9.61775e-99	4.86328e-95	215.161
chr3:125124106	6.52098	-0.115366	46.9524	9.61965e-99	4.86328e-95	215.161
chr8:48620210	7.19451	0.00640244	46.9515	9.64968e-99	4.87492e-95	215.158
chr6:14758501	-5.85768	-0.181768	-46.9506	9.67995e-99	4.88667e-95	215.155
chr4:41538212	4.00268	-1.97829	46.9502	9.69082e-99	4.88861e-95	215.153
chr1:172960229	6.37085	0.224939	46.9485	9.7478e-99	4.91379e-95	215.148
chr10:110501122	5.79366	-0.592195	46.948	9.76489e-99	4.91885e-95	215.146
chr7:130488584	6.56378	-0.0129878	46.9465	9.81158e-99	4.93879e-95	215.141
chr17:78681293	6.40524	-0.012378	46.9439	9.8994e-99	4.97939e-95	215.132
chr11:47861975	5.69841	-0.223476	46.9389	1.00644e-98	5.05876e-95	215.116
chr2:232315669	-6.08988	-0.881159	-46.9353	1.01858e-98	5.11607e-95	215.104
chr21:45427598	6.22061	0.0184756	46.934	1.02295e-98	5.13431e-95	215.1
chr22:25400971	-5.72537	-0.870976	-46.9312	1.03272e-98	5.17961e-95	215.09
chr17:82302394	-5.8372	-0.0537195	-46.9284	1.04224e-98	5.2236e-95	215.081
chr7:130488541	6.12073	-0.0197561	46.9262	1.05021e-98	5.25973e-95	215.074
chr12:8663038	6.58732	0.252805	46.9248	1.05496e-98	5.27973e-95	215.069
chr8:22170003	6.16061	0.442134	46.923	1.06134e-98	5.30786e-95	215.063
chr19:46920404	6.20939	0.310427	46.9213	1.06738e-98	5.33422e-95	215.058
chr12:65523582	5.34793	-0.810793	46.9198	1.07275e-98	5.35721e-95	215.053
chr16:4053500	-6.12549	-0.517378	-46.9158	1.087e-98	5.42447e-95	215.039
chr2:162245436	5.64049	0.114878	46.9138	1.0943e-98	5.457e-95	215.033
chr5:157385435	6.14951	-0.229024	46.9103	1.10732e-98	5.51796e-95	215.021
chr3:54901559	6.93854	0.219024	46.9072	1.11897e-98	5.57204e-95	215.011
chr6:53048628	-6.59244	-0.40878	-46.9068	1.12041e-98	5.57525e-95	215.009
chr13:104315940	5.85195	-0.0319512	46.9061	1.12295e-98	5.58387e-95	215.007
chr10:3494182	7.03378	0.454817	46.9053	1.126e-98	5.58852e-95	215.004
chr3:153892381	5.99427	-0.357988	46.9053	1.12615e-98	5.58852e-95	215.004
chr2:108588230	-4.49768	-1.49201	-46.9052	1.12629e-98	5.58852e-95	215.004
chr4:3385553	-6.53012	-1.02213	-46.8999	1.14627e-98	5.68362e-95	214.987
chr4:40301720	-6.50707	-0.125366	-46.8984	1.15229e-98	5.70938e-95	214.982
chr3:3666439	-5.83585	-0.577317	-46.8974	1.15612e-98	5.72188e-95	214.978
chr2:174026085	6.88915	0.0372561	46.8973	1.15646e-98	5.72188e-95	214.978
chr2:215447760	6.43171	0.10439	46.8933	1.17215e-98	5.79515e-95	214.965
chr3:8851850	5.91683	-0.166098	46.8931	1.17293e-98	5.79515e-95	214.964
chr2:200750583	6.69744	-0.255549	46.8924	1.17541e-98	5.80329e-95	214.962
chr6:33697597	-5.4328	-0.112012	-46.8921	1.17689e-98	5.80649e-95	214.961
chr16:70699901	-5.13659	0.871829	-46.8914	1.17936e-98	5.81456e-95	214.958
chr2:8145078	6.78232	0.248598	46.8898	1.1857e-98	5.84168e-95	214.953
chr1:3543704	6.39098	0.435488	46.8894	1.18727e-98	5.84417e-95	214.952
chr11:86559731	6.34463	-0.0435366	46.8893	1.18789e-98	5.84417e-95	214.951
chr6:157659758	-5.3672	-0.979573	-46.8882	1.19214e-98	5.86097e-95	214.948
chr12:52198732	-5.40207	-0.737256	-46.8841	1.20854e-98	5.93738e-95	214.934
chr10:3993212	6.48915	0.515915	46.8839	1.20956e-98	5.93821e-95	214.933
chr7:99562646	6.41488	-0.0352439	46.8813	1.22005e-98	5.98026e-95	214.925
chr12:92900002	5.15244	-0.545488	46.8812	1.22019e-98	5.98026e-95	214.925
chr2:9378610	6.60878	-0.0509756	46.8811	1.2207e-98	5.98026e-95	214.924
chr7:104123941	6.40951	0.0914634	46.8801	1.22506e-98	5.99736e-95	214.921
chr14:71001897	5.94402	-0.179573	46.8774	1.2361e-98	6.04719e-95	214.912
chr2:9378643	7.22707	-0.132439	46.8765	1.23961e-98	6.06006e-95	214.909
chr18:74929237	5.73427	-0.0714024	46.8759	1.24226e-98	6.06878e-95	214.907
chr15:80550391	5.66183	-0.720061	46.8734	1.25251e-98	6.11457e-95	214.899
chr7:30169361	5.4889	-0.812256	46.8719	1.25875e-98	6.14072e-95	214.894
chr13:37656871	6.17049	-0.101098	46.8693	1.27001e-98	6.19132e-95	214.885
chr7:29337363	-5.49829	-0.473171	-46.8682	1.27441e-98	6.20842e-95	214.882
chr10:102658155	-5.17744	-0.798476	-46.8676	1.27703e-98	6.21682e-95	214.879
chr22:26671437	-5.7689	-0.366159	-46.8673	1.2786e-98	6.21848e-95	214.878
chr18:23834946	6.27439	0.33622	46.8671	1.27915e-98	6.21848e-95	214.878
chr8:128428684	-4.52366	-1.49951	-46.8653	1.28681e-98	6.25134e-95	214.872
chr5:122907605	5.98476	0.100671	46.8646	1.2902e-98	6.26344e-95	214.869
chr10:8366647	6.91488	0.0231707	46.8609	1.30625e-98	6.3369e-95	214.857
chr6:12279638	5.86061	0.077622	46.8606	1.30717e-98	6.33697e-95	214.856
chr10:13484146	-6.21829	-0.583049	-46.8603	1.30857e-98	6.33933e-95	214.855
chr13:76966303	6.68854	0.0436585	46.8589	1.31491e-98	6.36278e-95	214.85
chr4:55503751	6.17549	0.345305	46.8588	1.31524e-98	6.36278e-95	214.85
chr2:144660626	6.26024	0.691463	46.8565	1.32527e-98	6.40358e-95	214.843
chr3:154795603	5.98232	-0.0784756	46.8565	1.32551e-98	6.40358e-95	214.842
chr9:90925832	5.48415	-0.171829	46.8537	1.33785e-98	6.4587e-95	214.833
chr6:10316598	6.56122	-0.333171	46.8505	1.35205e-98	6.52274e-95	214.823
chr6:31120422	5.97622	-0.0377439	46.8502	1.35356e-98	6.52553e-95	214.822
chr6:139338089	-5.73037	-0.495427	-46.8484	1.36172e-98	6.56031e-95	214.816
chr12:54052183	-5.01098	-0.94439	-46.8471	1.3678e-98	6.58503e-95	214.811
chr14:22509116	5.90268	0.892805	46.8459	1.37342e-98	6.6075e-95	214.807
chr12:12338523	-5.26476	-0.52872	-46.842	1.39135e-98	6.68915e-95	214.794
chr13:76011813	6.40037	0.0787195	46.8418	1.39242e-98	6.68968e-95	214.794
chr1:64879295	6.7778	-0.125244	46.8404	1.39851e-98	6.71055e-95	214.789
chr4:48904895	6.60207	0.105915	46.8404	1.39869e-98	6.71055e-95	214.789
chr8:48620037	6.85305	-0.085061	46.8399	1.40107e-98	6.71735e-95	214.787
chr11:63951975	-4.53585	-1.79305	-46.8377	1.41149e-98	6.76262e-95	214.78
chr1:206232150	5.87768	-0.120793	46.8373	1.41337e-98	6.76698e-95	214.779
chr17:43457122	-5.34756	-1.12744	-46.8363	1.41795e-98	6.78425e-95	214.776
chr8:143136226	-5.82159	-0.637256	-46.832	1.43859e-98	6.87827e-95	214.761
chr15:90594510	-6.07378	-0.477134	-46.8304	1.44614e-98	6.90962e-95	214.756
chr3:177934562	6.92354	0.00615854	46.8233	1.48123e-98	7.07121e-95	214.732
chr16:70700333	-5.88561	-1.03366	-46.8231	1.48199e-98	7.07121e-95	214.732
chr14:61406799	6.15671	-0.0415244	46.8184	1.50572e-98	7.17953e-95	214.716
chr12:19624615	5.95354	-0.178963	46.8174	1.51075e-98	7.19855e-95	214.713
chr14:61535634	6.43829	0.133293	46.8168	1.51386e-98	7.20843e-95	214.711
chr17:8608067	5.97476	0.612744	46.8144	1.52577e-98	7.26022e-95	214.703
chr17:82004329	6.05402	0.148963	46.8128	1.53421e-98	7.29536e-95	214.697
chr13:41614372	5.75	-0.680732	46.8121	1.53749e-98	7.30596e-95	214.695
chr1:8384555	5.975	0.490427	46.8118	1.53903e-98	7.30832e-95	214.694
chr17:57285614	-6.05341	-0.299512	-46.811	1.54339e-98	7.324e-95	214.691
chr2:16621627	6.56073	0.0165854	46.8106	1.54544e-98	7.32875e-95	214.69
chr2:100921792	6.81305	0.175305	46.8092	1.55279e-98	7.35859e-95	214.685
chr22:40385627	-5.76585	-0.532073	-46.8084	1.55684e-98	7.37276e-95	214.683
chr17:78681304	6.17768	-0.145061	46.8082	1.55804e-98	7.37341e-95	214.682
chr9:134661834	6.80707	-0.137317	46.8069	1.56479e-98	7.40036e-95	214.678
chr7:135520791	5.79549	0.263476	46.8064	1.56707e-98	7.40611e-95	214.676
chr11:78352424	6.4089	-0.324329	46.8055	1.57192e-98	7.42397e-95	214.673
chr1:221336460	4.95817	0.773841	46.8039	1.58031e-98	7.45853e-95	214.668
chr11:16815229	-5.8361	-0.441951	-46.8026	1.58725e-98	7.48624e-95	214.664
chr3:24145999	5.91951	0.0890244	46.8007	1.59721e-98	7.52811e-95	214.657
chr8:133449382	6.18317	-0.0968293	46.8004	1.59923e-98	7.53253e-95	214.656
chr12:102182895	-6.04854	-0.353537	-46.7991	1.60597e-98	7.55521e-95	214.652
chr12:104596776	6.82049	0.174756	46.7991	1.60622e-98	7.55521e-95	214.652
chr17:15433562	6.26902	0.218049	46.7988	1.60733e-98	7.55533e-95	214.651
chr11:109552541	6.63902	0.284268	46.7979	1.6123e-98	7.5736e-95	214.648
chr1:12496614	6.30902	-0.681341	46.7976	1.61381e-98	7.57554e-95	214.647
chr18:75490084	6.4761	0.0767073	46.7971	1.61661e-98	7.58362e-95	214.645
chr5:1103819	-5.28988	-1.8686	-46.7953	1.62674e-98	7.62597e-95	214.639
chr20:19934743	-5.89756	-0.333659	-46.7947	1.62983e-98	7.6353e-95	214.637
chr11:64855370	6.13293	-0.144512	46.792	1.64484e-98	7.70044e-95	214.628
chr13:20476008	-5.27415	-1.10402	-46.7888	1.66243e-98	7.77758e-95	214.618
chr2:215418418	6.52073	0.183415	46.784	1.68947e-98	7.89877e-95	214.602
chr9:131650839	6.58866	0.34628	46.7819	1.70126e-98	7.94853e-95	214.595
chr14:96285795	6.34329	-0.632378	46.781	1.7064e-98	7.96724e-95	214.592
chr9:36144526	-5.02439	-0.70061	-46.7762	1.73369e-98	8.08921e-95	214.576
chr6:139539955	6.15549	-0.273232	46.7758	1.73644e-98	8.09661e-95	214.574
chr2:105240225	6.45415	0.0246341	46.7747	1.74291e-98	8.12136e-95	214.571
chr1:2290778	-5.6572	-1.19506	-46.7744	1.74427e-98	8.12224e-95	214.57
chr1:225445187	-5.68829	-0.990976	-46.7739	1.74715e-98	8.13024e-95	214.568
chr3:156788224	5.61207	-0.0896951	46.7729	1.75304e-98	8.15217e-95	214.565
chr17:78682065	6.27293	0.497805	46.7718	1.75965e-98	8.17535e-95	214.561
chr1:93567305	6.40524	-0.0183537	46.7717	1.76037e-98	8.17535e-95	214.561
chr4:72768170	6.19159	-0.199695	46.7695	1.77345e-98	8.22898e-95	214.553
chr22:45226975	-6.06707	-0.55939	-46.7693	1.77428e-98	8.22898e-95	214.553
chr12:1489094	-4.82146	-1.52378	-46.769	1.77609e-98	8.2319e-95	214.552
chr2:237202290	5.76707	-0.482927	46.7687	1.77827e-98	8.2365e-95	214.551
chr7:2761531	6.71646	0.0217683	46.7683	1.78046e-98	8.24116e-95	214.55
chr18:58579817	6.23085	-0.145549	46.7676	1.78443e-98	8.25405e-95	214.547
chr12:14843649	6.62951	-0.203293	46.767	1.78832e-98	8.26462e-95	214.545
chr8:8389556	5.70195	-0.0630488	46.7668	1.78909e-98	8.26462e-95	214.545
chr19:39941741	-5.51902	-1.48378	-46.7637	1.80798e-98	8.34634e-95	214.534
chr7:104982674	5.33329	-0.932988	46.7618	1.81971e-98	8.39491e-95	214.528
chr20:56988013	5.68085	-0.487012	46.7609	1.82524e-98	8.41097e-95	214.525
chr12:11607770	6.56561	-0.0260976	46.7608	1.8256e-98	8.41097e-95	214.525
chr5:171864007	6.26756	-0.170488	46.7593	1.83478e-98	8.44764e-95	214.52
chr10:8058655	5.90171	-0.0139024	46.7559	1.85561e-98	8.53789e-95	214.508
chr3:63967951	-5.43951	-0.520854	-46.7497	1.89473e-98	8.71095e-95	214.488
chr1:206575528	-5.8461	-0.612927	-46.7496	1.89572e-98	8.71095e-95	214.487
chr10:8058435	7.17659	-0.0904878	46.7486	1.90191e-98	8.73361e-95	214.484
chr1:91731955	-6.21646	-0.625915	-46.7479	1.90631e-98	8.74807e-95	214.482
chr20:56988012	6.19134	-0.544695	46.745	1.92504e-98	8.82315e-95	214.472
chr13:33937704	6.07244	0.357439	46.745	1.92521e-98	8.82315e-95	214.472
chr13:95554125	-5.42317	-0.666098	-46.7423	1.94211e-98	8.89475e-95	214.463
chr4:80434589	6.29341	0.127683	46.7421	1.94394e-98	8.89726e-95	214.462
chr14:35365329	5.01146	-0.528171	46.7418	1.94536e-98	8.89795e-95	214.462
chr3:125124107	6.61878	-0.180488	46.7401	1.95653e-98	8.94316e-95	214.456
chr1:55719020	6.53463	-0.0559756	46.7386	1.96649e-98	8.9828e-95	214.451
chr5:10594838	6.98354	0.0122561	46.7359	1.98447e-98	9.05895e-95	214.442
chr13:109157796	6.1378	0.497561	46.7333	2.00177e-98	9.12921e-95	214.433
chr3:169667262	5.06451	-0.474817	46.7332	2.00248e-98	9.12921e-95	214.433
chr9:92501804	5.7578	0.49878	46.7317	2.01272e-98	9.16987e-95	214.428
chr3:55668465	5.85415	-0.00768293	46.7291	2.03059e-98	9.24523e-95	214.419
chr6:158043842	6.48768	0.17689	46.7288	2.03208e-98	9.24557e-95	214.418
chr2:64636511	-5.40854	-0.435122	-46.7287	2.03332e-98	9.24557e-95	214.418
chr3:133506518	-5.04268	-0.582317	-46.7247	2.06044e-98	9.36276e-95	214.405
chr8:22542126	5.90488	-0.167927	46.7241	2.06435e-98	9.37443e-95	214.403
chr10:8366556	6.74817	0.153232	46.723	2.07238e-98	9.40476e-95	214.399
chr10:8064148	6.21146	0.198659	46.7216	2.08219e-98	9.44311e-95	214.394
chr4:145650551	5.52829	0.961829	46.7212	2.08467e-98	9.44823e-95	214.393
chr8:22586748	6.99963	-0.0901829	46.72	2.09297e-98	9.47966e-95	214.389
chr1:235741511	5.73012	-0.149817	46.7168	2.11572e-98	9.57647e-95	214.378
chr4:145650206	6.20659	0.0562195	46.7162	2.1201e-98	9.59008e-95	214.376
chr3:52090161	5.7722	-0.515	46.7142	2.13458e-98	9.64929e-95	214.369
chr10:8058798	6.98378	0.0954268	46.7139	2.13646e-98	9.65154e-95	214.369
chr7:55308490	5.90451	-0.176768	46.7136	2.13862e-98	9.655e-95	214.368
chr1:40044331	-4.87707	-0.647073	-46.7133	2.14045e-98	9.657e-95	214.367
chr16:1675207	6.29622	-0.0716463	46.7126	2.14586e-98	9.67514e-95	214.364
chr1:15214938	6.07573	0.364573	46.7116	2.15289e-98	9.70056e-95	214.361
chr4:156378135	6.4889	0.240915	46.7106	2.16025e-98	9.72386e-95	214.358
chr4:139282471	5.73341	0.131341	46.7105	2.16085e-98	9.72386e-95	214.357
chr3:24146038	6.23927	-0.0528049	46.7098	2.16576e-98	9.73963e-95	214.355
chr10:50860353	5.9572	0.0287195	46.7084	2.17625e-98	9.78049e-95	214.35
chr7:2761994	6.77866	0.0581098	46.7054	2.19815e-98	9.87256e-95	214.34
chr2:150539130	5.8422	0.435732	46.7047	2.20299e-98	9.8801e-95	214.338
chr18:58579818	6.51902	-0.234268	46.7047	2.20356e-98	9.8801e-95	214.338
chr7:2310297	6.87024	-0.0654878	46.7046	2.20409e-98	9.8801e-95	214.338
chr8:130067890	6.98902	0.181341	46.703	2.21566e-98	9.91831e-95	214.332
chr7:101923788	7.41963	0.312378	46.703	2.2157e-98	9.91831e-95	214.332
chr9:136531642	-5.65098	-0.950732	-46.7029	2.21689e-98	9.91831e-95	214.332
chr14:54776351	-5.79695	-0.241402	-46.7016	2.22656e-98	9.94987e-95	214.328
chr1:3543703	6.33256	0.280305	46.7015	2.2268e-98	9.94987e-95	214.327
chr8:37599053	6.16744	-0.113963	46.7013	2.22869e-98	9.95193e-95	214.327
chr8:141266190	-5.69915	-0.810549	-46.6972	2.25945e-98	1.00828e-94	214.313
chr14:73424625	-4.15915	-1.64091	-46.6967	2.2634e-98	1.0094e-94	214.311
chr8:141147099	6.70573	-0.118232	46.6921	2.29853e-98	1.02441e-94	214.296
chr7:30169283	5.86037	-0.0560366	46.6912	2.3056e-98	1.02684e-94	214.293
chr5:140595741	-4.44256	-1.66274	-46.6909	2.30759e-98	1.02684e-94	214.292
chr2:147793689	5.7139	0.0784146	46.6908	2.30841e-98	1.02684e-94	214.292
chr2:235940605	7.09341	-0.120732	46.6863	2.34355e-98	1.04167e-94	214.277
chr7:134834941	6.28463	-0.429878	46.6861	2.34475e-98	1.04167e-94	214.276
chr1:226605094	6.47622	0.165549	46.6851	2.35304e-98	1.04469e-94	214.273
chr2:236715175	-6.32012	-0.656768	-46.6849	2.35476e-98	1.04479e-94	214.272
chr21:33381026	5.45317	-0.522195	46.6837	2.36377e-98	1.04812e-94	214.268
chr14:77593530	-4.79963	-1.20335	-46.6811	2.38478e-98	1.05676e-94	214.259
chr7:151472861	-5.73756	0.366098	-46.6767	2.42055e-98	1.07193e-94	214.245
chr19:46920425	5.8811	0.268354	46.676	2.42556e-98	1.07346e-94	214.243
chr12:92075833	5.76195	0.158171	46.6725	2.45456e-98	1.08501e-94	214.231
chr8:95693553	5.12573	-1.1086	46.6725	2.45477e-98	1.08501e-94	214.231
chr16:85004956	6.55976	0.0291463	46.6711	2.46598e-98	1.08927e-94	214.226
chr4:184407093	-5.31817	-0.450671	-46.668	2.4922e-98	1.10016e-94	214.216
chr17:75011386	6.44159	0.175793	46.6661	2.50802e-98	1.10644e-94	214.209
chr4:67575504	-5.1789	-0.684573	-46.6654	2.51349e-98	1.10815e-94	214.207
chr6:163750892	-6.47341	-0.477927	-46.6648	2.51896e-98	1.10986e-94	214.205
chr8:130233074	6.06256	0.00432927	46.6632	2.53243e-98	1.11509e-94	214.2
chr7:30171980	5.78402	0.0972561	46.6614	2.5474e-98	1.12097e-94	214.194
chr15:90830330	-5.89537	-0.0592683	-46.6611	2.55023e-98	1.12135e-94	214.193
chr11:11980339	6.3189	0.216159	46.661	2.55148e-98	1.12135e-94	214.192
chr1:226664803	6.9111	-0.0812805	46.6593	2.56549e-98	1.1268e-94	214.187
chr12:11607789	6.74329	0.0751829	46.6589	2.56877e-98	1.12752e-94	214.186
chr17:847132	-6.16256	-0.822256	-46.6565	2.58958e-98	1.13594e-94	214.178
chr12:92075850	5.28098	-0.12439	46.6558	2.59619e-98	1.13812e-94	214.175
chr19:7479692	6.90378	0.0627439	46.6501	2.64651e-98	1.15945e-94	214.156
chr5:9348081	6.26317	-0.0387805	46.6488	2.6578e-98	1.16367e-94	214.152
chr8:48620315	6.11585	-0.471951	46.648	2.6651e-98	1.16613e-94	214.149
chr3:124986372	6.16451	-0.222744	46.6461	2.68174e-98	1.17267e-94	214.143
chr4:182242983	6.69244	0.324146	46.6414	2.72494e-98	1.19082e-94	214.127
chr14:76867813	-5.5322	-0.941585	-46.6405	2.73234e-98	1.1933e-94	214.124
chr8:41120668	5.59939	-0.0353049	46.64	2.73778e-98	1.19493e-94	214.122
chr16:11155594	6.4178	0.0806098	46.6393	2.74391e-98	1.19685e-94	214.12
chr16:88194757	-5.15585	-1.46939	-46.6356	2.7784e-98	1.21114e-94	214.108
chr2:160293496	6.81268	0.239634	46.6352	2.78209e-98	1.21199e-94	214.106
chr10:129757381	-5.55622	-0.784573	-46.6346	2.78702e-98	1.21338e-94	214.105
chr2:113241844	4.47329	-1.72689	46.6315	2.81641e-98	1.22541e-94	214.094
chr6:11711799	-6.0561	-0.082439	-46.6267	2.86251e-98	1.24469e-94	214.078
chr17:81323767	-4.72268	-1.26963	-46.6217	2.91127e-98	1.2651e-94	214.061
chr17:78681245	6.14585	-0.163415	46.6209	2.91873e-98	1.26755e-94	214.059
chr7:151472903	-6.1172	0.48628	-46.6196	2.93119e-98	1.27217e-94	214.055
chr8:48620407	6.2389	-0.0232317	46.6156	2.97126e-98	1.28843e-94	214.041
chr5:142432759	-4.40768	-1.98506	-46.6155	2.97237e-98	1.28843e-94	214.041
chr11:126992452	5.92159	-0.285305	46.6115	3.01235e-98	1.30495e-94	214.027
chr2:72965895	5.12476	0.974817	46.6111	3.0159e-98	1.30568e-94	214.026
chr13:111282146	-5.68024	-0.839146	-46.6101	3.02599e-98	1.30923e-94	214.023
chr18:75490068	6.2311	-0.109329	46.6079	3.0493e-98	1.31849e-94	214.015
chr17:50197279	6.17341	0.375488	46.6046	3.08249e-98	1.33202e-94	214.005
chr8:134848667	6.40098	0.183537	46.6025	3.10487e-98	1.34085e-94	213.997
chr13:76888998	7.2178	0.274268	46.5973	3.15891e-98	1.36335e-94	213.98
chr14:91124557	-6.50841	-0.0939634	-46.5944	3.19041e-98	1.37609e-94	213.97
chr20:54229036	5.69244	-0.260488	46.5923	3.21318e-98	1.38505e-94	213.963
chr5:9624520	5.23915	0.654817	46.5909	3.22775e-98	1.38998e-94	213.959
chr2:208129995	6.52915	0.320305	46.5907	3.23051e-98	1.38998e-94	213.958
chr8:104337337	6.20098	-0.0982927	46.5907	3.2306e-98	1.38998e-94	213.958
chr9:93093392	-4.47732	-1.39659	-46.5893	3.24551e-98	1.39553e-94	213.953
chr2:20514992	5.70732	-0.597927	46.588	3.25928e-98	1.40059e-94	213.949
chr13:21071132	5.7278	-0.423293	46.5877	3.26349e-98	1.40153e-94	213.948
chr7:2761875	6.22915	0.402988	46.5858	3.28367e-98	1.40933e-94	213.942
chr7:112435180	6.38073	0.251585	46.585	3.29248e-98	1.41224e-94	213.939
chr3:186986278	-5.70744	-0.862744	-46.584	3.30384e-98	1.41624e-94	213.936
chr12:106080497	6.42878	-0.179024	46.5837	3.30658e-98	1.41654e-94	213.935
chr3:138694818	5.98451	0.217988	46.5834	3.31083e-98	1.41749e-94	213.934
chr13:41614493	5.99634	-0.451098	46.581	3.33723e-98	1.42792e-94	213.926
chr4:87108320	6.81378	-0.244451	46.5795	3.35408e-98	1.43424e-94	213.921
chr15:39473120	6.70415	0.183659	46.5777	3.3742e-98	1.44196e-94	213.915
chr1:117142113	6.14195	0.463659	46.5767	3.38558e-98	1.44594e-94	213.911
chr5:122154978	6.69573	-0.0653049	46.5765	3.38808e-98	1.44612e-94	213.911
chr3:64265026	6.0111	0.237256	46.5742	3.41489e-98	1.45667e-94	213.903
chr16:88235061	6.40793	-0.245305	46.5733	3.42478e-98	1.45999e-94	213.9
chr12:46524225	5.58402	-0.589329	46.5729	3.42933e-98	1.46104e-94	213.899
chr17:78775428	-5.94244	-0.60939	-46.5678	3.48902e-98	1.48425e-94	213.882
chr5:142432783	-5.77683	-1.07329	-46.5677	3.49003e-98	1.48425e-94	213.881
chr20:19934742	-5.56744	-0.2925	-46.5677	3.4902e-98	1.48425e-94	213.881
chr10:124036436	-4.91854	-0.792683	-46.5658	3.51198e-98	1.49259e-94	213.875
chr13:34225172	5.66963	0.15689	46.5641	3.53217e-98	1.49988e-94	213.869
chr12:12979240	6.05817	-0.10811	46.5639	3.53519e-98	1.49988e-94	213.868
chr2:235044352	-6.28463	-0.220854	-46.5638	3.53559e-98	1.49988e-94	213.868
chr16:3657060	6.18268	-0.01	46.561	3.56892e-98	1.5131e-94	213.859
chr4:108890829	5.30073	-0.522805	46.5596	3.58555e-98	1.51922e-94	213.854
chr3:12253808	6.7978	0.292439	46.5587	3.59642e-98	1.5229e-94	213.851
chr1:172654721	5.70439	-0.340366	46.5564	3.6254e-98	1.53424e-94	213.843
chr5:137619450	6.75329	0.0216463	46.5559	3.63047e-98	1.53545e-94	213.842
chr12:66036361	5.80549	-0.411646	46.553	3.66678e-98	1.54987e-94	213.832
chr2:65065130	-4.53439	-1.35524	-46.5522	3.67622e-98	1.55292e-94	213.83
chr11:109552558	6.8239	0.498902	46.5517	3.68285e-98	1.55477e-94	213.828
chr3:15637095	6.72939	0.490427	46.5511	3.68973e-98	1.55674e-94	213.826
chr2:85590136	-6.15207	-6.09756e-05	-46.5484	3.72362e-98	1.57008e-94	213.817
chr5:180069893	-5.01232	-1.04262	-46.5444	3.77353e-98	1.59016e-94	213.804
chr4:147530875	5.66671	0.23311	46.5435	3.78513e-98	1.59409e-94	213.801
chr20:50346773	-5.60951	-1.0122	-46.5418	3.80787e-98	1.60269e-94	213.795
chr9:121823818	6.73463	0.0532927	46.5412	3.81465e-98	1.60458e-94	213.793
chr8:8664662	6.50622	-0.104695	46.5401	3.82937e-98	1.6098e-94	213.789
chr8:60792813	-6.05585	0.101951	-46.5382	3.85376e-98	1.61907e-94	213.783
chr14:35365361	5.27695	0.177378	46.5377	3.86066e-98	1.62099e-94	213.781
chr4:87108310	6.55659	-0.444268	46.5374	3.86403e-98	1.62143e-94	213.78
chr1:66464947	6.15646	-0.138963	46.5362	3.87912e-98	1.62678e-94	213.776
chr11:65916159	5.03963	-1.20652	46.532	3.93472e-98	1.6491e-94	213.762
chr19:4988245	7.0628	0.00152439	46.5317	3.9394e-98	1.65007e-94	213.761
chr20:38166630	6.57341	0.029878	46.5306	3.95378e-98	1.6551e-94	213.757
chr2:120177058	-5.92622	-0.383354	-46.5295	3.96848e-98	1.66026e-94	213.754
chr6:157109113	6.40915	0.102134	46.5286	3.98047e-98	1.66427e-94	213.751
chr6:72812372	6.31061	0.288476	46.528	3.98756e-98	1.66624e-94	213.749
chr3:119418442	6.57561	-0.0971951	46.5276	3.99375e-98	1.66782e-94	213.747
chr19:4988247	7.18317	0.356707	46.5255	4.02144e-98	1.67838e-94	213.741
chr7:150399984	6.78098	0.0190244	46.5242	4.03981e-98	1.68451e-94	213.736
chr21:29266249	6.16598	0.191524	46.5241	4.04097e-98	1.68451e-94	213.736
chr15:92845033	-4.81183	-1.25848	-46.5238	4.0447e-98	1.68505e-94	213.735
chr14:50985822	4.79976	1.23659	46.5201	4.09523e-98	1.70452e-94	213.722
chr6:45640413	6.525	0.224817	46.5199	4.09851e-98	1.70452e-94	213.722
chr18:43078566	5.74549	0.0645732	46.5199	4.09876e-98	1.70452e-94	213.722
chr13:77529866	6.48256	-0.0264024	46.5145	4.17296e-98	1.73434e-94	213.704
chr1:197222933	5.85744	0.270061	46.5134	4.18958e-98	1.74021e-94	213.7
chr4:24795121	5.84951	-0.730122	46.5129	4.19581e-98	1.74175e-94	213.698
chr8:28658192	-5.67902	-0.560488	-46.5088	4.25491e-98	1.76524e-94	213.684
chr4:40311875	-5.82427	0.0917683	-46.508	4.2657e-98	1.76866e-94	213.682
chr5:68434121	5.54671	-1.23567	46.5066	4.28583e-98	1.77595e-94	213.677
chr5:128536506	6.76744	0.0962805	46.5041	4.32139e-98	1.78861e-94	213.669
chr4:145197024	6.57549	0.0240854	46.5041	4.32153e-98	1.78861e-94	213.669
chr5:180213148	-5.14488	-1.2361	-46.5019	4.3547e-98	1.80127e-94	213.661
chr15:93028998	-5.97659	-0.940122	-46.5011	4.36527e-98	1.80457e-94	213.659
chr2:88690770	6.5439	0.128415	46.5002	4.37955e-98	1.80939e-94	213.656
chr15:68206119	-5.66537	-0.734634	-46.4983	4.4067e-98	1.81953e-94	213.65
chr12:54051545	-5.79256	-0.623598	-46.4967	4.43087e-98	1.82843e-94	213.644
chr1:228739770	6.39183	-0.538354	46.4962	4.43805e-98	1.8303e-94	213.643
chr7:100857241	6.12963	0.380183	46.4945	4.46416e-98	1.83947e-94	213.637
chr15:68206017	-3.835	-1.7436	-46.4944	4.46556e-98	1.83947e-94	213.637
chr20:19223792	6.56146	0.273902	46.4924	4.49583e-98	1.85084e-94	213.63
chr8:89778602	6.715	0.522012	46.4906	4.52367e-98	1.8612e-94	213.624
chr4:3385500	-6.97817	-0.261646	-46.4899	4.53331e-98	1.86407e-94	213.622
chr2:99602702	5.63012	-0.00310976	46.4892	4.54498e-98	1.86776e-94	213.619
chr22:35742309	6.1211	-0.0906707	46.4863	4.58891e-98	1.88471e-94	213.609
chr9:134663106	6.28073	-0.181341	46.4854	4.60214e-98	1.88903e-94	213.607
chr1:59151466	6.31439	0.116585	46.4851	4.60779e-98	1.88926e-94	213.605
chr16:85295435	6.66402	0.202622	46.4851	4.60815e-98	1.88926e-94	213.605
chr1:150550791	5.91902	-0.470854	46.4834	4.63329e-98	1.89845e-94	213.6
chr18:58996292	5.89524	-0.765427	46.482	4.65527e-98	1.90575e-94	213.595
chr3:64612624	5.93159	-0.165427	46.482	4.65656e-98	1.90575e-94	213.595
chr16:89581339	5.9389	0.271768	46.4805	4.67947e-98	1.914e-94	213.59
chr7:116212999	5.84683	0.0770732	46.478	4.71857e-98	1.92885e-94	213.582
chr6:53465360	6.22244	0.0839024	46.4757	4.75596e-98	1.943e-94	213.574
chr16:4516058	-5.31744	-1.02384	-46.4754	4.76106e-98	1.94394e-94	213.573
chr3:54954254	6.01744	-0.587988	46.4746	4.77336e-98	1.94782e-94	213.57
chr4:3385414	-6.2822	-1.12415	-46.4714	4.82441e-98	1.9675e-94	213.56
chr8:106539826	6.7611	0.122988	46.4686	4.87043e-98	1.9851e-94	213.55
chr14:32457730	7.0611	0.0568902	46.468	4.87991e-98	1.9878e-94	213.548
chr10:45420655	-6.33695	-0.761768	-46.4673	4.8922e-98	1.99165e-94	213.546
chr16:47392270	-5.67341	-0.77	-46.4668	4.89977e-98	1.99299e-94	213.544
chr13:95554511	-4.75476	-1.37774	-46.4667	4.90256e-98	1.99299e-94	213.544
chr11:460468	7.20695	-0.0167683	46.4666	4.90409e-98	1.99299e-94	213.543
chr15:79179052	6.70061	0.314207	46.4641	4.94572e-98	2.00873e-94	213.535
chr12:11651689	-5.66159	-0.415305	-46.4639	4.94864e-98	2.00875e-94	213.535
chr9:134591050	7.23317	-0.177195	46.4633	4.95855e-98	2.0116e-94	213.533
chr1:172452934	6.05732	-0.110854	46.4615	4.98898e-98	2.02277e-94	213.526
chr2:159092039	-5.4339	-0.312317	-46.4591	5.02858e-98	2.03764e-94	213.519
chr18:8791517	6.77073	0.26878	46.4585	5.0396e-98	2.04091e-94	213.516
chr2:67260660	6.18402	-0.127378	46.4579	5.04861e-98	2.04337e-94	213.515
chr5:9714437	5.7572	-0.475427	46.4566	5.07104e-98	2.05126e-94	213.51
chr2:134154488	-4.2878	-1.17024	-46.4561	5.08011e-98	2.05373e-94	213.508
chr1:167796907	5.6139	-0.198902	46.455	5.09822e-98	2.05986e-94	213.505
chr5:395602	6.82244	0.0813415	46.4531	5.13111e-98	2.07194e-94	213.499
chr7:50535514	7.23549	0.19128	46.4511	5.16657e-98	2.08391e-94	213.492
chr4:100649697	5.83878	0.397561	46.4511	5.16673e-98	2.08391e-94	213.492
chr7:4715776	-6.26951	-0.196098	-46.4496	5.19237e-98	2.09304e-94	213.487
chr2:232315704	-6.72293	-0.502195	-46.4485	5.21212e-98	2.09978e-94	213.483
chr8:2075237	-5.75244	-1.09378	-46.4452	5.26972e-98	2.12176e-94	213.472
chr2:208130413	6.43951	0.0396341	46.4443	5.28693e-98	2.12746e-94	213.469
chr1:8096258	6.31232	0.0121341	46.4441	5.29019e-98	2.12754e-94	213.468
chr5:33997427	-5.00024	-1.70573	-46.4427	5.31542e-98	2.13645e-94	213.464
chr2:224817290	6.28232	0.182866	46.4406	5.35261e-98	2.15016e-94	213.457
chr5:142960462	6.14305	0.179817	46.4393	5.37539e-98	2.15806e-94	213.452
chr20:38166721	5.87927	-0.549146	46.4366	5.42534e-98	2.17686e-94	213.443
chr8:128678081	5.30256	0.804573	46.4344	5.46478e-98	2.19142e-94	213.436
chr5:10702190	6.97463	0.022561	46.4341	5.4703e-98	2.19238e-94	213.435
chr1:206232131	6.0022	0.27122	46.4328	5.49454e-98	2.20083e-94	213.431
chr8:38798828	6.19378	0.0992073	46.4282	5.58036e-98	2.23391e-94	213.415
chr4:76984874	6.31451	-0.265671	46.4274	5.59615e-98	2.23895e-94	213.412
chr2:8526074	-5.45854	-0.968293	-46.4266	5.61031e-98	2.24332e-94	213.41
chr3:177934705	6.04232	-0.208963	46.4255	5.6319e-98	2.25067e-94	213.406
chr20:20521016	6.21512	0.0334146	46.424	5.66006e-98	2.26062e-94	213.401
chr5:122155192	6.41854	-0.0564634	46.4214	5.7104e-98	2.27942e-94	213.392
chr12:124385627	6.54073	0.215732	46.4207	5.72394e-98	2.28203e-94	213.39
chr4:26222047	5.98829	0.132683	46.4205	5.72671e-98	2.28203e-94	213.39
chr10:35876397	6.59878	-0.035	46.4205	5.72678e-98	2.28203e-94	213.389
chr20:38166532	6.4422	-0.0759756	46.4195	5.74653e-98	2.28859e-94	213.386
chr13:32824198	6.9122	0.281951	46.4192	5.75219e-98	2.28953e-94	213.385
chr11:8836004	6.45732	0.178659	46.4187	5.76199e-98	2.29124e-94	213.383
chr15:101711062	5.90415	-0.18878	46.4187	5.76307e-98	2.29124e-94	213.383
chr4:158020938	5.76512	-0.108049	46.4183	5.76925e-98	2.29239e-94	213.382
chr21:43598021	6.26512	0.182439	46.4178	5.77985e-98	2.29529e-94	213.38
chr9:134661844	5.88354	-0.238476	46.4167	5.80034e-98	2.30212e-94	213.377
chr7:2518023	5.18744	0.185061	46.4156	5.82381e-98	2.31012e-94	213.373
chr19:1214240	-5.39171	-0.722439	-46.4148	5.83801e-98	2.31443e-94	213.37
chr1:224212956	6.8339	-0.0835366	46.4123	5.88875e-98	2.33281e-94	213.362
chr16:84478705	5.9811	0.4325	46.4121	5.89108e-98	2.33281e-94	213.361
chr7:80478987	5.82744	-0.0553049	46.4112	5.90971e-98	2.33886e-94	213.358
chr15:31264173	-5.4361	-1.23524	-46.4098	5.93782e-98	2.34865e-94	213.354
chr13:95530400	-4.42366	-1.3939	-46.4058	6.01891e-98	2.37937e-94	213.34
chr1:24022924	7.00207	0.00993902	46.4045	6.04533e-98	2.38846e-94	213.336
chr7:29596972	6.23171	0.100122	46.404	6.05467e-98	2.39079e-94	213.334
chr22:45609041	-4.37622	-1.59311	-46.4033	6.06953e-98	2.3953e-94	213.332
chr6:132467276	6.83951	0.307439	46.4022	6.09107e-98	2.40244e-94	213.328
chr5:179794074	-5.01146	-1.3672	-46.3996	6.14576e-98	2.42264e-94	213.319
chr4:128751358	5.15439	0.698171	46.3982	6.17555e-98	2.43301e-94	213.315
chr16:17225008	-5.2389	-0.599451	-46.3978	6.18212e-98	2.43421e-94	213.314
chr4:107876320	-5.74134	-0.3375	-46.396	6.21982e-98	2.44768e-94	213.307
chr11:460412	7.11585	0.0481707	46.3955	6.23071e-98	2.45058e-94	213.306
chr1:203154053	5.69268	-0.715	46.3947	6.2479e-98	2.45525e-94	213.303
chr11:128503884	6.0022	-0.0241463	46.3946	6.24966e-98	2.45525e-94	213.303
chr6:113997323	5.47171	0.0542683	46.3944	6.25407e-98	2.4556e-94	213.302
chr16:84478704	5.83951	0.555	46.3938	6.26619e-98	2.45897e-94	213.3
chr8:106539801	6.70512	0.321098	46.3933	6.27756e-98	2.46205e-94	213.298
chr2:45008039	-4.04073	-2.125	-46.3916	6.31413e-98	2.475e-94	213.293
chr2:227871076	6.93878	0.171098	46.3914	6.31857e-98	2.47534e-94	213.292
chr2:134254049	-7.13366	-0.417805	-46.3883	6.38472e-98	2.49985e-94	213.281
chr19:3338730	-5.47878	-1.26915	-46.386	6.43379e-98	2.51765e-94	213.274
chr2:12928398	5.91378	-0.099939	46.3851	6.45405e-98	2.52416e-94	213.271
chr6:29516212	-5.22134	-1.45384	-46.3839	6.47994e-98	2.53286e-94	213.267
chr10:30058448	5.72805	-0.23378	46.3821	6.51845e-98	2.54535e-94	213.261
chr1:12496918	5.59427	0.735671	46.3821	6.51921e-98	2.54535e-94	213.261
chr12:14843593	7.26866	0.0671341	46.3802	6.56179e-98	2.56054e-94	213.254
chr17:78681333	6.99854	0.0880488	46.379	6.58761e-98	2.56917e-94	213.25
chr2:235940486	5.86939	-0.764085	46.3782	6.60433e-98	2.57425e-94	213.248
chr11:63951980	-5.22024	-0.355854	-46.378	6.60928e-98	2.57474e-94	213.247
chr10:124341070	-5.79268	-1.07268	-46.3762	6.64971e-98	2.58904e-94	213.241
chr4:3385562	-6.75366	-0.696098	-46.3754	6.66924e-98	2.59519e-94	213.238
chr3:14424909	-6.2039	-0.10122	-46.3731	6.72046e-98	2.61366e-94	213.231
chr21:38769621	6.64939	0.0355488	46.3699	6.79196e-98	2.64e-94	213.22
chr2:111161064	6.4778	-0.120976	46.368	6.83676e-98	2.65593e-94	213.214
chr2:46169643	6.32366	-0.307439	46.3614	6.99143e-98	2.7145e-94	213.191
chr13:100518009	-5.34451	-0.516646	-46.361	7.00027e-98	2.71641e-94	213.19
chr7:50535640	6.8761	0.0412195	46.36	7.02335e-98	2.72385e-94	213.187
chr6:113353665	6.28159	-0.0872561	46.359	7.0486e-98	2.73212e-94	213.183
chr7:76912077	6.28683	0.194268	46.3586	7.0573e-98	2.73397e-94	213.182
chr11:13717613	6.4639	-0.24439	46.3571	7.0928e-98	2.7462e-94	213.177
chr13:41614439	6.66427	-0.23189	46.355	7.14348e-98	2.76428e-94	213.17
chr14:91400317	-5.48439	-0.95378	-46.3545	7.15466e-98	2.76656e-94	213.168
chr12:54051476	-5.04439	-0.319756	-46.3544	7.15736e-98	2.76656e-94	213.168
chr8:95693592	5.47402	-0.826037	46.3543	7.16129e-98	2.76656e-94	213.168
chr2:98501918	6.31598	0.691768	46.3527	7.1993e-98	2.7797e-94	213.162
chr8:48620021	6.83476	-0.130427	46.3509	7.24255e-98	2.7948e-94	213.156
chr12:132507030	-5.18512	-1.16317	-46.3506	7.25041e-98	2.7948e-94	213.155
chr4:87108332	6.70329	-0.268476	46.3506	7.25044e-98	2.7948e-94	213.155
chr18:58859363	6.00232	-0.673841	46.3487	7.29732e-98	2.81131e-94	213.149
chr13:29532880	6.42463	0.326341	46.3464	7.35293e-98	2.83117e-94	213.141
chr16:14307958	6.19195	0.241951	46.3447	7.39632e-98	2.8463e-94	213.135
chr9:121823631	6.31415	0.180732	46.3443	7.40688e-98	2.84879e-94	213.134
chr10:3781804	5.71878	-0.364634	46.3441	7.41117e-98	2.84887e-94	213.133
chr21:27423301	6.64232	-0.0568902	46.3408	7.49265e-98	2.8786e-94	213.123
chr22:31602266	6.2239	0.112805	46.3407	7.49697e-98	2.87867e-94	213.122
chr8:120538620	6.49122	0.22622	46.3398	7.51845e-98	2.88533e-94	213.119
chr10:8058756	6.94183	-0.0407927	46.3391	7.53727e-98	2.89095e-94	213.117
chr11:28168841	5.02951	0.715366	46.3377	7.57152e-98	2.90249e-94	213.112
chr19:1943187	-4.32024	-2.30549	-46.337	7.59052e-98	2.90817e-94	213.11
chr16:67526341	6.71146	0.0964634	46.3333	7.68669e-98	2.9434e-94	213.097
chr2:8145157	6.51963	0.166646	46.3328	7.69802e-98	2.94612e-94	213.096
chr1:40312651	-4.3422	-1.43634	-46.3309	7.74961e-98	2.96423e-94	213.089
chr6:34363090	-4.9189	-1.03957	-46.3284	7.81326e-98	2.98694e-94	213.081
chr15:68787890	-4.68134	-0.382012	-46.328	7.82386e-98	2.98935e-94	213.08
chr2:64636510	-5.76683	-0.721463	-46.327	7.85187e-98	2.99841e-94	213.076
chr13:100517683	-5.41561	0.294634	-46.3265	7.86376e-98	3.0013e-94	213.075
chr8:48620366	6.68268	-0.111098	46.3262	7.87305e-98	3.0032e-94	213.073
chr15:63030412	5.2511	-0.768598	46.3242	7.9246e-98	3.02121e-94	213.067
chr3:43389820	-5.99305	-0.465427	-46.3229	7.96129e-98	3.03353e-94	213.062
chr5:395626	6.68378	0.0443293	46.3222	7.97896e-98	3.0386e-94	213.06
chr11:130162898	-6.25549	-1.16128	-46.3214	8.00194e-98	3.04569e-94	213.057
chr9:130893965	-5.65354	-0.580183	-46.3136	8.21357e-98	3.12453e-94	213.031
chr3:71504392	6.42427	-0.360305	46.3128	8.23618e-98	3.13142e-94	213.029
chr1:53077836	5.98585	0.539878	46.3123	8.25068e-98	3.13522e-94	213.027
chr12:14843591	6.59598	-0.433232	46.3109	8.28882e-98	3.14799e-94	213.022
chr16:1675192	6.61476	0.112134	46.3099	8.31781e-98	3.15728e-94	213.019
chr7:4715709	-6.20134	-0.658841	-46.3082	8.36536e-98	3.1736e-94	213.013
chr2:59463569	6.47341	-0.0154878	46.3071	8.39726e-98	3.18397e-94	213.009
chr20:62603413	-6.35695	-0.843598	-46.3067	8.40709e-98	3.18554e-94	213.008
chr6:83958301	6.13207	-0.21628	46.3066	8.41055e-98	3.18554e-94	213.008
chr3:190003341	5.45171	0.253902	46.3057	8.43809e-98	3.19423e-94	213.005
chr19:56119808	6.79171	-0.699878	46.3041	8.48154e-98	3.20893e-94	212.999
chr10:102658220	-5.17159	-0.933476	-46.2953	8.73916e-98	3.3014e-94	212.97
chr12:116371114	6.41476	-0.195549	46.2952	8.74027e-98	3.3014e-94	212.97
chr4:4555984	6.6278	0.0115854	46.2952	8.74267e-98	3.3014e-94	212.969
chr6:22877930	6.16427	-0.100793	46.2951	8.7449e-98	3.3014e-94	212.969
chr4:150212350	6.19817	-0.280061	46.2948	8.7528e-98	3.30211e-94	212.968
chr16:19758144	-6.87512	-0.249634	-46.2947	8.75626e-98	3.30211e-94	212.968
chr1:63918276	6.14537	-0.00987805	46.2942	8.76995e-98	3.30548e-94	212.966
chr4:15163315	5.33256	-1.03628	46.293	8.80685e-98	3.31759e-94	212.962
chr7:100857229	5.9628	0.108841	46.2924	8.82427e-98	3.32235e-94	212.96
chr7:95500883	6.32878	0.16	46.2917	8.84506e-98	3.32838e-94	212.958
chr12:132507015	-4.49951	-1.8122	-46.2897	8.90582e-98	3.34943e-94	212.951
chr7:152177973	6.15244	0.0395122	46.2894	8.91368e-98	3.35058e-94	212.95
chr9:34255095	6.57159	-0.0440854	46.2892	8.92147e-98	3.3517e-94	212.949
chr11:130162904	-6.4672	-0.939329	-46.289	8.92703e-98	3.35198e-94	212.949
chr16:72953500	6.69061	0.108354	46.2875	8.97059e-98	3.36652e-94	212.944
chr1:206557991	-5.96244	-1.01707	-46.287	8.98558e-98	3.37033e-94	212.942
chr5:59422766	5.96488	0.0886585	46.2864	9.00533e-98	3.37591e-94	212.94
chr14:100949553	5.02195	0.966951	46.2824	9.12619e-98	3.41938e-94	212.927
chr9:134661879	6.11707	-0.195122	46.2814	9.15842e-98	3.42961e-94	212.923
chr5:122155193	6.30207	0.0751829	46.2795	9.2167e-98	3.44958e-94	212.917
chr4:158020941	5.70866	-0.188354	46.2776	9.27581e-98	3.46984e-94	212.911
chr18:74498962	-5.34634	-1.06866	-46.2762	9.32035e-98	3.48463e-94	212.906
chr13:43022470	6.1511	0.523963	46.2731	9.42013e-98	3.51882e-94	212.895
chr22:28829791	-5.43171	-1.00122	-46.273	9.4219e-98	3.51882e-94	212.895
chr6:112439229	6.25146	0.114878	46.2686	9.56368e-98	3.56891e-94	212.88
chr2:36655533	5.81646	0.586159	46.2684	9.57075e-98	3.56891e-94	212.88
chr5:10702189	6.73671	-0.0732317	46.2683	9.57142e-98	3.56891e-94	212.879
chr1:147761314	6.48024	-0.100854	46.2678	9.5878e-98	3.57311e-94	212.878
chr2:36489658	5.17512	-0.0895122	46.2663	9.63713e-98	3.58957e-94	212.873
chr7:28103968	5.81732	0.286098	46.2661	9.64392e-98	3.59018e-94	212.872
chr1:235741521	5.95646	0.00152439	46.2659	9.65101e-98	3.5909e-94	212.871
chr18:74929232	5.47451	-0.265305	46.2633	9.73679e-98	3.62036e-94	212.862
chr9:129750961	6.51146	0.268659	46.2632	9.74059e-98	3.62036e-94	212.862
chr2:208130469	6.41683	-0.0114634	46.2627	9.75702e-98	3.62453e-94	212.86
chr4:87108278	6.90037	-0.126524	46.2622	9.77326e-98	3.62863e-94	212.859
chr22:40528169	6.85354	0.153841	46.2602	9.83865e-98	3.65096e-94	212.852
chr4:41160262	6.44915	0.385305	46.26	9.84537e-98	3.6515e-94	212.851
chr18:62450786	-5.89293	-0.650122	-46.2584	9.89758e-98	3.66891e-94	212.846
chr7:37259777	-5.80573	-0.680671	-46.2573	9.93544e-98	3.68099e-94	212.842
chr3:14424942	-4.86024	-1.53366	-46.2571	9.94244e-98	3.68162e-94	212.842
chr10:8058587	6.69585	-0.112439	46.2567	9.95481e-98	3.68424e-94	212.84
chr17:78775031	-6.19085	-0.993598	-46.2558	9.98519e-98	3.69352e-94	212.837
chr10:3781876	6.08061	-0.0882317	46.2544	1.00335e-97	3.7094e-94	212.833
chr10:30058446	5.78	-0.130488	46.2538	1.0053e-97	3.71464e-94	212.831
chr3:181741629	5.52378	0.739451	46.2536	1.00602e-97	3.71533e-94	212.83
chr2:33134130	-5.0161	-0.844756	-46.2534	1.00673e-97	3.71598e-94	212.829
chr19:47518246	-5.20768	-1.43079	-46.2451	1.03554e-97	3.82032e-94	212.801
chr12:8661255	6.31939	0.324817	46.2445	1.03748e-97	3.82544e-94	212.799
chr4:168483887	6.07476	0.332256	46.2418	1.04703e-97	3.85859e-94	212.79
chr5:171864046	5.73829	-0.339512	46.2397	1.05434e-97	3.88349e-94	212.783
chr7:152136803	6.61305	0.184695	46.2392	1.0561e-97	3.8879e-94	212.782
chr8:130067891	7.02549	0.143841	46.2388	1.05756e-97	3.89125e-94	212.78
chr15:79179103	6.5922	-0.285976	46.2377	1.06174e-97	3.90457e-94	212.776
chr3:54954245	5.49744	-0.907378	46.2359	1.06822e-97	3.92631e-94	212.77
chr2:216426210	5.61951	0.190366	46.2353	1.07019e-97	3.93148e-94	212.769
chr1:224635600	6.68122	-0.0491463	46.2337	1.07619e-97	3.95144e-94	212.763
chr5:171863946	6.37061	0.0154268	46.232	1.08236e-97	3.97199e-94	212.757
chr1:231636287	6.23585	-0.382927	46.2301	1.08931e-97	3.9954e-94	212.751
chr17:64231958	6.97744	-0.0835976	46.2294	1.09203e-97	4.00326e-94	212.749
chr3:150442333	6.2311	0.258232	46.2275	1.0989e-97	4.02632e-94	212.742
chr9:36306813	-5.00268	-1.46232	-46.2272	1.09984e-97	4.02763e-94	212.741
chr11:8835920	6.84354	-0.0203049	46.2245	1.11026e-97	4.06366e-94	212.732
chr10:8057974	6.30634	-0.114146	46.224	1.11194e-97	4.06767e-94	212.731
chr8:143136211	-5.58585	-0.622195	-46.2238	1.11289e-97	4.069e-94	212.73
chr7:28041923	6.34561	0.0319512	46.2235	1.11386e-97	4.0704e-94	212.729
chr2:221980947	6.95744	0.1475	46.2221	1.1192e-97	4.08779e-94	212.724
chr12:12979611	6.35183	-0.120183	46.2214	1.12198e-97	4.09581e-94	212.722
chr2:70699136	6.37902	-0.077561	46.2197	1.12827e-97	4.11659e-94	212.716
chr1:203324304	-5.67207	-0.798598	-46.219	1.13084e-97	4.12382e-94	212.714
chr1:9900662	-5.05524	-1.36384	-46.2129	1.15473e-97	4.20872e-94	212.693
chr14:54569289	6.54439	-0.0580488	46.2116	1.15964e-97	4.2242e-94	212.689
chr6:84263722	6.20378	-0.211524	46.2115	1.16019e-97	4.2242e-94	212.688
chr11:101442459	6.28573	-0.0659146	46.2068	1.17864e-97	4.28914e-94	212.673
chr13:77529867	5.65134	0.0843293	46.2063	1.18075e-97	4.29459e-94	212.671
chr5:128378361	6.75549	0.207012	46.2051	1.18539e-97	4.3092e-94	212.667
chr7:157302606	-5.51805	-1.01878	-46.2038	1.19072e-97	4.32633e-94	212.663
chr12:5033775	5.88232	-0.296037	46.2028	1.19481e-97	4.33891e-94	212.659
chr2:19801837	5.30646	-0.0220122	46.2017	1.19917e-97	4.35248e-94	212.656
chr10:110357691	6.47415	-0.183049	46.1997	1.20714e-97	4.37911e-94	212.649
chr21:38742542	6.13024	0.165488	46.1991	1.20975e-97	4.38631e-94	212.647
chr1:115168646	6.035	0.1125	46.1981	1.21365e-97	4.39815e-94	212.644
chr3:190323431	-5.43634	-0.907439	-46.1979	1.21451e-97	4.39897e-94	212.643
chr15:93028957	-5.97305	-1.11957	-46.1959	1.22277e-97	4.4266e-94	212.636
chr1:63874015	6.06195	0.14061	46.1957	1.22381e-97	4.42806e-94	212.635
chr2:227870532	6.71122	0.310122	46.1949	1.2272e-97	4.43803e-94	212.633
chr2:73020968	6.55	0.47939	46.1944	1.2292e-97	4.44293e-94	212.631
chr12:106080496	6.74927	0.0110976	46.1926	1.23658e-97	4.46729e-94	212.625
chr6:16171566	5.89646	0.325061	46.1906	1.24497e-97	4.49526e-94	212.618
chr1:64879065	6.09683	0.159024	46.1897	1.24881e-97	4.5068e-94	212.615
chr7:102045411	-5.87146	-1.01085	-46.1891	1.25116e-97	4.51293e-94	212.613
chr15:68206251	-5.50085	-0.77811	-46.1886	1.25345e-97	4.51885e-94	212.612
chr11:86559767	5.66012	0.429451	46.1883	1.25467e-97	4.52091e-94	212.611
chr8:20282507	4.95793	0.0957927	46.1875	1.25837e-97	4.5319e-94	212.608
chr2:236715224	-6.5378	-0.763049	-46.1866	1.26219e-97	4.5433e-94	212.605
chr17:62718591	5.94159	-0.195061	46.1853	1.26757e-97	4.56031e-94	212.6
chr6:3809375	5.98695	0.259329	46.1839	1.27341e-97	4.57896e-94	212.596
chr1:148942134	6.45524	0.0166463	46.182	1.28173e-97	4.60649e-94	212.589
chr16:67482186	-4.51598	-1.57872	-46.1799	1.29082e-97	4.63677e-94	212.582
chr13:75804219	6.29159	0.333232	46.1786	1.29676e-97	4.65571e-94	212.578
chr16:88194758	-4.84866	-1.17957	-46.1768	1.30464e-97	4.68034e-94	212.572
chr15:42508612	6.66561	0.250976	46.1767	1.30508e-97	4.68034e-94	212.572
chr5:180804054	-6.125	-0.554085	-46.1766	1.30564e-97	4.68034e-94	212.571
chr18:75183859	5.97476	0.12128	46.1731	1.32123e-97	4.73378e-94	212.559
chr8:25179709	5.91915	-0.0714024	46.1723	1.32458e-97	4.74336e-94	212.557
chr10:3993203	6.37659	0.47061	46.1716	1.32775e-97	4.75227e-94	212.554
chr8:22921860	6.3028	0.21628	46.1689	1.34009e-97	4.79366e-94	212.545
chr10:110500765	6.4161	-0.556341	46.1686	1.34117e-97	4.79366e-94	212.544
chr16:88234560	6.7489	-0.0772561	46.1686	1.34138e-97	4.79366e-94	212.544
chr1:2174993	-5.55549	-0.637622	-46.1671	1.3482e-97	4.81555e-94	212.539
chr6:43851211	6.63951	0.177439	46.1668	1.34966e-97	4.81828e-94	212.538
chr2:144510943	5.59305	-0.587622	46.1641	1.36211e-97	4.8592e-94	212.529
chr3:189231735	6.41732	0.353537	46.164	1.36251e-97	4.8592e-94	212.529
chr6:159953272	-5.3911	-1.51762	-46.1638	1.36342e-97	4.85993e-94	212.528
chr2:9378642	6.51232	-0.136037	46.1636	1.36428e-97	4.86054e-94	212.527
chr2:235044368	-6.21159	-0.194207	-46.1623	1.37041e-97	4.87985e-94	212.523
chr7:100857240	5.82195	0.157073	46.1621	1.37116e-97	4.88004e-94	212.522
chr5:51215174	5.44244	0.449268	46.1618	1.37262e-97	4.88274e-94	212.521
chr16:72858948	6.73561	-0.047439	46.1608	1.37723e-97	4.89467e-94	212.518
chr22:46791446	-5.98159	-0.36811	-46.1608	1.37738e-97	4.89467e-94	212.518
chr7:80850616	6.22927	0.382195	46.1597	1.38248e-97	4.91028e-94	212.514
chr4:3385480	-6.20854	-1.40744	-46.1594	1.38394e-97	4.91295e-94	212.513
chr3:55162050	5.32988	-0.281768	46.1546	1.40634e-97	4.98994e-94	212.497
chr4:7843191	6.63976	0.32122	46.1543	1.40778e-97	4.99249e-94	212.496
chr1:89943633	6.50622	0.153841	46.1527	1.41563e-97	5.01779e-94	212.491
chr7:30931746	7.08451	-0.0872561	46.1523	1.4173e-97	5.02117e-94	212.49
chr2:64943904	-6.68256	-0.097378	-46.152	1.41873e-97	5.02368e-94	212.489
chr1:8096317	6.50244	-0.0707317	46.1506	1.42553e-97	5.04518e-94	212.484
chr14:67557187	6.1939	0.191341	46.1493	1.43206e-97	5.0657e-94	212.479
chr8:140598558	-5.93866	-0.545061	-46.1481	1.43793e-97	5.08169e-94	212.475
chr1:1265046	6.76085	0.0620122	46.1479	1.43874e-97	5.08169e-94	212.475
chr21:33381032	5.1139	-0.737561	46.1479	1.43877e-97	5.08169e-94	212.475
chr2:172283018	5.68195	0.328659	46.147	1.443e-97	5.09405e-94	212.472
chr3:131350041	6.56378	0.0843293	46.1448	1.45412e-97	5.13069e-94	212.464
chr6:21711332	6.15573	0.230793	46.1433	1.46129e-97	5.15114e-94	212.459
chr16:68823116	4.94256	1.31323	46.1432	1.46177e-97	5.15114e-94	212.459
chr1:12496797	6.51646	0.33811	46.1431	1.46213e-97	5.15114e-94	212.459
chr11:460649	7.29768	-0.236768	46.1422	1.46695e-97	5.16551e-94	212.455
chr7:142312210	6.5789	-0.236159	46.1397	1.47911e-97	5.20569e-94	212.447
chr10:8064053	6.38988	0.0792073	46.1395	1.48008e-97	5.20648e-94	212.447
chr2:241269010	5.9589	0.134451	46.1391	1.4824e-97	5.21182e-94	212.445
chr16:82059767	6.19683	-0.235854	46.1389	1.4831e-97	5.21182e-94	212.445
chr1:42737337	-6.48988	-1.02848	-46.1378	1.48874e-97	5.22901e-94	212.441
chr1:15214939	6.3789	0.547256	46.1376	1.48994e-97	5.23057e-94	212.44
chr12:124385565	6.20805	0.251585	46.1363	1.49617e-97	5.24979e-94	212.436
chr8:140598546	-6.14098	-0.583293	-46.1359	1.49856e-97	5.25555e-94	212.434
chr8:27670227	5.78866	0.0104268	46.1356	1.49976e-97	5.25691e-94	212.433
chr11:69599846	-5.72061	-0.0188415	-46.1355	1.50048e-97	5.25691e-94	212.433
chr1:27138073	6.6522	0.538415	46.1353	1.50121e-97	5.25691e-94	212.432
chr8:2075187	-5.77732	-1.23256	-46.135	1.50289e-97	5.26003e-94	212.431
chr1:2290980	-4.32878	-2.19366	-46.1349	1.50362e-97	5.26003e-94	212.431
chr2:200750499	6.39988	-0.401159	46.1331	1.51281e-97	5.28952e-94	212.425
chr16:77834591	5.51378	-0.39128	46.1314	1.52125e-97	5.31638e-94	212.419
chr14:88476610	6.8972	0.302378	46.1303	1.5273e-97	5.33483e-94	212.415
chr6:125945713	6.01037	-0.0242073	46.1283	1.53746e-97	5.3652e-94	212.409
chr9:121823679	6.38695	0.170915	46.1282	1.53783e-97	5.3652e-94	212.409
chr9:5509641	6.20171	0.253902	46.1281	1.53831e-97	5.3652e-94	212.408
chr11:126992338	5.8239	-0.71439	46.125	1.55497e-97	5.42062e-94	212.398
chr1:220791545	-5.92317	-0.0371951	-46.1248	1.55603e-97	5.42159e-94	212.397
chr7:115015763	6.11585	0.15622	46.1245	1.55764e-97	5.42449e-94	212.396
[truncated: 1,046,576+ more rows]
